# Supplementary material for: GSR-DB: a manually curated and optimized taxonomical database for 16S rRNA amplicon analysis
Source: PubMed Central journal article supplement (PMC10946287; doi:10.1128/msystems.00950-23), 2024-01-08
Supplement: msystems.00950-23-s0007.pdf [file msystems.00950-23-s0007.pdf]

Supplementary Table 1: Abundance and Relative abundance of the artificial mock communities at the species level.

| Species                                         | mockname | Abundance      |
|-------------------------------------------------|----------|----------------|
| Acidaminococcus_fermentans                      | gutmock  | 57.0 (0.03%)   |
| Acidaminococcus_fermentans-intestini            | gutmock  | 330.0 (0.15%)  |
| Acidaminococcus_intestini                       | gutmock  | 930.0 (0.41%)  |
| Acutalibacter_muris                             | gutmock  | 9.0 (0.00%)    |
| Aestuariispira_insulae                          | gutmock  | 172.0 (0.08%)  |
| Akkermansia_muciniphila                         | gutmock  | 2812.0 (1.25%) |
| Alistipes_communis                              | gutmock  | 780.0 (0.35%)  |
| Alistipes_finegoldii                            | gutmock  | 1005.0 (0.45%) |
| Alistipes_ihumii                                | gutmock  | 480.0 (0.21%)  |
| Alistipes_indistinctus                          | gutmock  | 117.0 (0.05%)  |
| Alistipes_inops                                 | gutmock  | 630.0 (0.28%)  |
| Alistipes_onderdonkii                           | gutmock  | 4060.0 (1.81%) |
| Alistipes_putredinis                            | gutmock  | 630.0 (0.28%)  |
| Alistipes_shahii                                | gutmock  | 685.0 (0.30%)  |
| Allisonella_histaminiformans                    | gutmock  | 99.0 (0.04%)   |
| Alloprevotella_rava                             | gutmock  | 30.0 (0.01%)   |
| Alloscardovia_omnicolens                        | gutmock  | 54.0 (0.02%)   |
| Alteracholeplasma_parvum                        | gutmock  | 52.0 (0.02%)   |
| Alterileibacterium_massiliense                  | gutmock  | 175.0 (0.08%)  |
| Anaerobutyricum_soehngenii                      | gutmock  | 87.0 (0.04%)   |
| Anaerobutyricum_soehngenii:[Eubacterium]_hallii | gutmock  | 681.0 (0.30%)  |
| Anaerococcus_obesiensis                         | gutmock  | 8.0 (0.00%)    |
| Anaerococcus_obesiensis-vaginalis               | gutmock  | 113.0 (0.05%)  |
| Anaerococcus_prevotii                           | gutmock  | 87.0 (0.04%)   |
| Anaerococcus_provencensis                       | gutmock  | 16.0 (0.01%)   |
| Anaerococcus_vaginalis                          | gutmock  | 708.0 (0.32%)  |
| Anaeroglobus_geminatus                          | gutmock  | 37.0 (0.02%)   |
| Anaeromassilibacillus_senegalensis              | gutmock  | 400.0 (0.18%)  |
| Anaerosporobacter_mobilis                       | gutmock  | 306.0 (0.14%)  |
| Anaerostipes_caccae                             | gutmock  | 140.0 (0.06%)  |
| Anaerostipes_hadrus                             | gutmock  | 4656.0 (2.07%) |
| Anaerotignum_aminivorans                        | gutmock  | 104.0 (0.05%)  |
| Anaerotignum_faecicola                          | gutmock  | 640.0 (0.28%)  |
| Anaerotignum_lactatifermentans                  | gutmock  | 819.0 (0.36%)  |
| Bacilliculturomica_massiliensis                 | gutmock  | 18.0 (0.01%)   |
| Bacteroidales_oral                              | gutmock  | 52.0 (0.02%)   |
| Bacteroides_caccae                              | gutmock  | 2661.0 (1.18%) |
| Bacteroides_caccae-stercoris:Phocaeicola_dorei  | gutmock  | 653.0 (0.29%)  |
| Bacteroides_clarus                              | gutmock  | 240.0 (0.11%)  |
| Bacteroides_eggerthii                           | gutmock  | 398.0 (0.18%)  |
| Bacteroides_finegoldii                          | gutmock  | 145.0 (0.06%)  |
| Bacteroides_intestinalis                        | gutmock  | 142.0 (0.06%)  |
| Bacteroides_kribbi                              | gutmock  | 869.0 (0.39%)  |
| Bacteroides_kribbi-xylanisolvens                | gutmock  | 352.0 (0.16%)  |
| Bacteroides_rodentium                           | gutmock  | 905.0 (0.40%)  |
| Bacteroides_salyersiae                          | gutmock  | 332.0 (0.15%)  |
| Bacteroides_stercoris                           | gutmock  | 2073.0 (0.92%) |
| Bacteroides_xylanisolvens                       | gutmock  | 24.0 (0.01%)   |
| Barnesiella_intestinihominis                    | gutmock  | 1295.0 (0.58%) |
| Bifidobacterium_bifidum                         | gutmock  | 142.0 (0.06%)  |
| Bifidobacterium_dentium                         | gutmock  | 889.0 (0.40%)  |
| Bilophila_wadsworthia                           | gutmock  | 1295.0 (0.58%) |
| Blautia_caecimuris                              | gutmock  | 278.0 (0.12%)  |
| Blautia_caecimuris-glucerasea-producta          | gutmock  | 133.0 (0.06%)  |
| Blautia_caecimuris-producta                     | gutmock  | 146.0 (0.06%)  |
| Blautia_coccoides                               | gutmock  | 29.0 (0.01%)   |
| Blautia_coccoides-producta                      | gutmock  | 8.0 (0.00%)    |
| Blautia_faecis                                  | gutmock  | 2388.0 (1.06%) |
| Blautia_glucerasea                              | gutmock  | 72.0 (0.03%)   |
| Blautia_hydrogenotrophica                       | gutmock  | 82.0 (0.04%)   |
| Blautia_luti                                    | gutmock  | 1557.0 (0.69%) |
| Blautia_luti-obeum-wexlerae                     | gutmock  | 5109.0 (2.27%) |

Continued on next page

Supplementary Table 1: Abundance and Relative abundance of the artificial mock communities at the species level.

| Species                                                   | mockname | Abundance      |
|-----------------------------------------------------------|----------|----------------|
| Blautia_obeum                                             | gutmock  | 2173.0 (0.97%) |
| Blautia_producta                                          | gutmock  | 78.0 (0.03%)   |
| Blautia_schinkii                                          | gutmock  | 1293.0 (0.58%) |
| Blautia_wexlerae                                          | gutmock  | 4814.0 (2.14%) |
| Bulleidia_p-1630-c5                                       | gutmock  | 18.0 (0.01%)   |
| Butyricoccus_porcorum                                     | gutmock  | 64.0 (0.03%)   |
| Butyricoccus_pullicaecorum                                | gutmock  | 160.0 (0.07%)  |
| Butyricimonas_faecihominis                                | gutmock  | 150.0 (0.07%)  |
| Butyricimonas_faecihominis-paravirosa                     | gutmock  | 77.0 (0.03%)   |
| Butyricimonas_paravirosa                                  | gutmock  | 72.0 (0.03%)   |
| Butyricimonas_virosa                                      | gutmock  | 158.0 (0.07%)  |
| Butyrivibrio_crossotus                                    | gutmock  | 140.0 (0.06%)  |
| Caecibacterium_sporoformans                               | gutmock  | 48.0 (0.02%)   |
| Campylobacter_conciscus                                   | gutmock  | 29.0 (0.01%)   |
| Campylobacter_gracilis                                    | gutmock  | 20.0 (0.01%)   |
| Campylobacter_hominis                                     | gutmock  | 555.0 (0.25%)  |
| Campylobacter_ureolyticus                                 | gutmock  | 94.0 (0.04%)   |
| Caproicibacter_fermentans                                 | gutmock  | 35.0 (0.02%)   |
| Caproiciproducens_galactitolivorans                       | gutmock  | 636.0 (0.28%)  |
| Catenibacterium_mitsuokai                                 | gutmock  | 299.0 (0.13%)  |
| Cellulosilyticum_ruminicola                               | gutmock  | 15.0 (0.01%)   |
| Cloacibacillus_porcorum                                   | gutmock  | 70.0 (0.03%)   |
| Clostridium_aminobutyricum                                | gutmock  | 48.0 (0.02%)   |
| Clostridium_paraputrificum                                | gutmock  | 129.0 (0.06%)  |
| Clostridium_tarantellae                                   | gutmock  | 167.0 (0.07%)  |
| Colidextribacter_massiliensis                             | gutmock  | 105.0 (0.05%)  |
| Collinsella_aerofaciens                                   | gutmock  | 85.0 (0.04%)   |
| Conservatibacter_flavescens                               | gutmock  | 858.0 (0.38%)  |
| Coprobacillus_cateniformis                                | gutmock  | 286.0 (0.13%)  |
| Coprobacter_fastidiosus                                   | gutmock  | 318.0 (0.14%)  |
| Coprobacter_secundus                                      | gutmock  | 118.0 (0.05%)  |
| Coprococcus_catus                                         | gutmock  | 1026.0 (0.46%) |
| Coprococcus_comes                                         | gutmock  | 2191.0 (0.97%) |
| Coprococcus_eutactus                                      | gutmock  | 2173.0 (0.97%) |
| Corynebacterium_pyruviciproducens                         | gutmock  | 20.0 (0.01%)   |
| Corynebacterium_tuberculostearicum                        | gutmock  | 20.0 (0.01%)   |
| Cuneatibacter_caecimuris                                  | gutmock  | 224.0 (0.10%)  |
| Desulfovibrio_D168                                        | gutmock  | 379.0 (0.17%)  |
| Desulfovibrio_fairfieldensis                              | gutmock  | 50.0 (0.02%)   |
| Desulfovibrio_piger                                       | gutmock  | 355.0 (0.16%)  |
| Dialister_invisus                                         | gutmock  | 836.0 (0.37%)  |
| Dialister_micraerophilus                                  | gutmock  | 15.0 (0.01%)   |
| Dialister_pneumosintes                                    | gutmock  | 120.0 (0.05%)  |
| Dialister_propionicifaciens                               | gutmock  | 200.0 (0.09%)  |
| Dialister_propionicifaciens-succinatiphilus               | gutmock  | 137.0 (0.06%)  |
| Dialister_succinatiphilus                                 | gutmock  | 249.0 (0.11%)  |
| Dielma_fastidiosa                                         | gutmock  | 196.0 (0.09%)  |
| Dorea_formicigenerans                                     | gutmock  | 41.0 (0.02%)   |
| Dorea_longicatena                                         | gutmock  | 251.0 (0.11%)  |
| Dorea_longicatena:[Ruminococcus]_gnavus:human_intestinal  | gutmock  | 222.0 (0.10%)  |
| Duodenibacillus_massiliensis                              | gutmock  | 316.0 (0.14%)  |
| Dysosmobacter_welbionis                                   | gutmock  | 1700.0 (0.76%) |
| Eisenbergiella_massiliensis                               | gutmock  | 64.0 (0.03%)   |
| Eisenbergiella_massiliensis-tayi                          | gutmock  | 76.0 (0.03%)   |
| Eisenbergiella_tayi                                       | gutmock  | 218.0 (0.10%)  |
| Erysipelatoclostridium_amosum                             | gutmock  | 1896.0 (0.84%) |
| Erysipelatoclostridium_amosum:[Clostridium]_saccharogumia | gutmock  | 247.0 (0.11%)  |
| Ethanoligenens_harbinense                                 | gutmock  | 90.0 (0.04%)   |
| Eubacterium_coprostanoligenes                             | gutmock  | 2472.0 (1.10%) |
| Eubacterium_limosum                                       | gutmock  | 27.0 (0.01%)   |
| Eubacterium_ramulus                                       | gutmock  | 675.0 (0.30%)  |
| Eubacterium_ruminantium                                   | gutmock  | 490.0 (0.22%)  |
| Facklamia_hominis                                         | gutmock  | 12.0 (0.01%)   |

Continued on next page

Supplementary Table 1: Abundance and Relative abundance of the artificial mock communities at the species level.

| Species                                                                    | mockname | Abundance       |
|----------------------------------------------------------------------------|----------|-----------------|
| Faecalibacterium_prausnitzii                                               | gutmock  | 12792.0 (5.69%) |
| Faecalibacterium_prausnitzii:Gemmiger_formicilis:Subdoligranulum_variabile | gutmock  | 571.0 (0.25%)   |
| Faecalibacterium_prausnitzii:bacterium_ic1379                              | gutmock  | 19.0 (0.01%)    |
| Faecalicatena_contorta                                                     | gutmock  | 18.0 (0.01%)    |
| Faecalicoccus_acidiformans                                                 | gutmock  | 78.0 (0.03%)    |
| Faecalimonas_umbilicata                                                    | gutmock  | 469.0 (0.21%)   |
| Faecalitalea_cylindroides                                                  | gutmock  | 33.0 (0.01%)    |
| Faecalitalea_cylindroides:Longicatena_caecimuris                           | gutmock  | 93.0 (0.04%)    |
| Fastidiosipila_sanguinis                                                   | gutmock  | 25.0 (0.01%)    |
| Fenollaria_massiliensis                                                    | gutmock  | 355.0 (0.16%)   |
| Filifactor_villosus                                                        | gutmock  | 41.0 (0.02%)    |
| Fingoldia_magna                                                            | gutmock  | 458.0 (0.20%)   |
| Firmicutes_oral                                                            | gutmock  | 150.0 (0.07%)   |
| Flavonifractor_plautii                                                     | gutmock  | 1840.0 (0.82%)  |
| Flintibacter_butyricus                                                     | gutmock  | 944.0 (0.42%)   |
| Fournierella_massiliensis                                                  | gutmock  | 450.0 (0.20%)   |
| Frasingicoccus_caecimuris                                                  | gutmock  | 345.0 (0.15%)   |
| Fusicatenibacter_saccharivorans                                            | gutmock  | 2520.0 (1.12%)  |
| Fusobacterium_gonidiaformans                                               | gutmock  | 21.0 (0.01%)    |
| Fusobacterium_gonidiaformans-necrophorum                                   | gutmock  | 18.0 (0.01%)    |
| Fusobacterium_naviforme                                                    | gutmock  | 90.0 (0.04%)    |
| Fusobacterium_naviforme-simiae                                             | gutmock  | 40.0 (0.02%)    |
| Fusobacterium_necrophorum                                                  | gutmock  | 63.0 (0.03%)    |
| Fusobacterium_periodonticum                                                | gutmock  | 33.0 (0.01%)    |
| Fusobacterium_simiae                                                       | gutmock  | 12.0 (0.01%)    |
| Fusobacterium_ulcerans                                                     | gutmock  | 20.0 (0.01%)    |
| Gemmiger_formicilis                                                        | gutmock  | 1048.0 (0.47%)  |
| Gemmiger_formicilis:Subdoligranulum_variabile                              | gutmock  | 526.0 (0.23%)   |
| Harryflintia_acetispora                                                    | gutmock  | 20.0 (0.01%)    |
| Herbinix_luporum                                                           | gutmock  | 20.0 (0.01%)    |
| Holdemanella_biformis                                                      | gutmock  | 939.0 (0.42%)   |
| Holdemanella_biformis:[Eubacterium]_biforme                                | gutmock  | 258.0 (0.11%)   |
| Holdemania_filiformis                                                      | gutmock  | 104.0 (0.05%)   |
| Holdemania_massiliensis                                                    | gutmock  | 134.0 (0.06%)   |
| Howardella_ureilytica                                                      | gutmock  | 250.0 (0.11%)   |
| Hungatella_hathewayi                                                       | gutmock  | 694.0 (0.31%)   |
| Hydrogeniiclostridium_mannosilyticum                                       | gutmock  | 64.0 (0.03%)    |
| Ihubacter_massiliensis                                                     | gutmock  | 825.0 (0.37%)   |
| Intestinibacter_bartlettii                                                 | gutmock  | 1032.0 (0.46%)  |
| Intestinimonas_massiliensis                                                | gutmock  | 117.0 (0.05%)   |
| Intestinimonas_timonensis                                                  | gutmock  | 9.0 (0.00%)     |
| Lachnoclostridium_phocaeense                                               | gutmock  | 90.0 (0.04%)    |
| Lacticaseibacillus_chiayiensis                                             | gutmock  | 66.0 (0.03%)    |
| Lactobacillus_equicursoris                                                 | gutmock  | 16.0 (0.01%)    |
| Lactobacillus_gasseri                                                      | gutmock  | 54.0 (0.02%)    |
| Lactobacillus_iners                                                        | gutmock  | 9.0 (0.00%)     |
| Lawsonella_clevelandensis                                                  | gutmock  | 75.0 (0.03%)    |
| Lawsonibacter_asaccharolyticus                                             | gutmock  | 680.0 (0.30%)   |
| Ligilactobacillus_ruminis                                                  | gutmock  | 45.0 (0.02%)    |
| Limosilactobacillus_fermentum                                              | gutmock  | 39.0 (0.02%)    |
| Limosilactobacillus_fermentum-mucosae                                      | gutmock  | 40.0 (0.02%)    |
| Limosilactobacillus_mucosae                                                | gutmock  | 157.0 (0.07%)   |
| Longibaculum_muris                                                         | gutmock  | 16.0 (0.01%)    |
| Longicatena_caecimuris                                                     | gutmock  | 258.0 (0.11%)   |
| Mailhella_massiliensis                                                     | gutmock  | 25.0 (0.01%)    |
| Marseillibacter_massiliensis                                               | gutmock  | 1185.0 (0.53%)  |
| Massilimicrobiota_timonensis                                               | gutmock  | 137.0 (0.06%)   |
| Massiliprevotella_massiliensis                                             | gutmock  | 237.0 (0.11%)   |
| Mediterranea_massiliensis                                                  | gutmock  | 25.0 (0.01%)    |
| Mediterraneibacter_faecis                                                  | gutmock  | 618.0 (0.27%)   |
| Mediterraneibacter_faecis:[Ruminococcus]_torques                           | gutmock  | 331.0 (0.15%)   |
| Megamonas_funiformis                                                       | gutmock  | 195.0 (0.09%)   |
| Megasphaera_elsdenii                                                       | gutmock  | 111.0 (0.05%)   |

Continued on next page

Supplementary Table 1: Abundance and Relative abundance of the artificial mock communities at the species level.

| Species                               | mockname | Abundance        |
|---------------------------------------|----------|------------------|
| Megasphaera_massiliensis              | gutmock  | 164.0 (0.07%)    |
| Megasphaera_micronuciformis           | gutmock  | 89.0 (0.04%)     |
| Merdimonas_faecis                     | gutmock  | 177.0 (0.08%)    |
| Metaprevotella_massiliensis           | gutmock  | 44.0 (0.02%)     |
| Methanobrevibacter_smithii            | gutmock  | 159.0 (0.07%)    |
| Mitsuokella_jalaludinii               | gutmock  | 40.0 (0.02%)     |
| Mobiluncus_curtisii                   | gutmock  | 53.0 (0.02%)     |
| Monoglobus_pectinilyticus             | gutmock  | 1460.0 (0.65%)   |
| Morganella_morganii                   | gutmock  | 65.0 (0.03%)     |
| Murdochiella_asaccharolytica          | gutmock  | 90.0 (0.04%)     |
| Muribaculum_intestinale               | gutmock  | 44.0 (0.02%)     |
| Murimonas_intestini                   | gutmock  | 6.0 (0.00%)      |
| Negativibacillus_massiliensis         | gutmock  | 595.0 (0.26%)    |
| Neglectibacter_timonensis             | gutmock  | 928.0 (0.41%)    |
| Odoribacter_laneus                    | gutmock  | 132.0 (0.06%)    |
| Odoribacter_splanchnicus              | gutmock  | 721.0 (0.32%)    |
| Oscillibacter_ruminantium             | gutmock  | 860.0 (0.38%)    |
| Oxalobacter_formigenes                | gutmock  | 12.0 (0.01%)     |
| Papillibacter_cinnamivorans           | gutmock  | 264.0 (0.12%)    |
| Parabacteroides_chongii               | gutmock  | 45.0 (0.02%)     |
| Parabacteroides_distasonis            | gutmock  | 4653.0 (2.07%)   |
| Parabacteroides_goldsteinii           | gutmock  | 1199.0 (0.53%)   |
| Parabacteroides_gordonii              | gutmock  | 77.0 (0.03%)     |
| Parabacteroides_johnsonii             | gutmock  | 367.0 (0.16%)    |
| Parabacteroides_merdae                | gutmock  | 3507.0 (1.56%)   |
| Parafannyhessea_umbonata              | gutmock  | 15.0 (0.01%)     |
| Paraprevotella_clara                  | gutmock  | 1501.0 (0.67%)   |
| Paraprevotella_xylaniphila            | gutmock  | 41.0 (0.02%)     |
| Parasutterella_excrementihominis      | gutmock  | 985.0 (0.44%)    |
| Parasutterella_secunda                | gutmock  | 121.0 (0.05%)    |
| Parvimonas_micra                      | gutmock  | 25.0 (0.01%)     |
| Peptococcus_niger                     | gutmock  | 96.0 (0.04%)     |
| Peptococcus_niger-simiae              | gutmock  | 28.0 (0.01%)     |
| Peptococcus_simiae                    | gutmock  | 12.0 (0.01%)     |
| Peptoniphilus_catoniae                | gutmock  | 12.0 (0.01%)     |
| Peptoniphilus_coxii                   | gutmock  | 25.0 (0.01%)     |
| Peptoniphilus_coxii-urinimassiliensis | gutmock  | 45.0 (0.02%)     |
| Peptoniphilus_duerdenii               | gutmock  | 40.0 (0.02%)     |
| Peptoniphilus_lacrimalis              | gutmock  | 230.0 (0.10%)    |
| Peptoniphilus_obesi                   | gutmock  | 60.0 (0.03%)     |
| Peptoniphilus_urinimassiliensis       | gutmock  | 164.0 (0.07%)    |
| Peptostreptococcus_anaerobius         | gutmock  | 53.0 (0.02%)     |
| Petroclostridium_xylanilyticum        | gutmock  | 52.0 (0.02%)     |
| Phascolarctobacterium_faecium         | gutmock  | 1024.0 (0.46%)   |
| Phascolarctobacterium_succinatutens   | gutmock  | 64.0 (0.03%)     |
| Phocaeicola_coprocola                 | gutmock  | 462.0 (0.21%)    |
| Phocaeicola_coprophilus               | gutmock  | 53.0 (0.02%)     |
| Phocaeicola_dorei                     | gutmock  | 3001.0 (1.34%)   |
| Phocaeicola_dorei-vulgatus            | gutmock  | 5082.0 (2.26%)   |
| Phocaeicola_massiliensis              | gutmock  | 1008.0 (0.45%)   |
| Phocaeicola_plebeius                  | gutmock  | 1162.0 (0.52%)   |
| Phocaeicola_vulgatus                  | gutmock  | 26237.0 (11.67%) |
| Porphyromonas_asaccharolytica         | gutmock  | 162.0 (0.07%)    |
| Porphyromonas_asaccharolytica-uenonis | gutmock  | 60.0 (0.03%)     |
| Porphyromonas_bennonis                | gutmock  | 301.0 (0.13%)    |
| Porphyromonas_somerae                 | gutmock  | 24.0 (0.01%)     |
| Porphyromonas_uenonis                 | gutmock  | 18.0 (0.01%)     |
| Prevotella_bivia                      | gutmock  | 460.0 (0.20%)    |
| Prevotella_brunnea                    | gutmock  | 20.0 (0.01%)     |
| Prevotella_buccalis                   | gutmock  | 502.0 (0.22%)    |
| Prevotella_colorans                   | gutmock  | 88.0 (0.04%)     |
| Prevotella_copri                      | gutmock  | 5742.0 (2.55%)   |
| Prevotella_corporis                   | gutmock  | 1992.0 (0.89%)   |

Continued on next page

Supplementary Table 1: Abundance and Relative abundance of the artificial mock communities at the species level.

| Species                                                                                             | mockname | Abundance      |
|-----------------------------------------------------------------------------------------------------|----------|----------------|
| Prevotella_disiens                                                                                  | gutmock  | 98.0 (0.04%)   |
| Prevotella_paludivivens                                                                             | gutmock  | 34.0 (0.02%)   |
| Prevotella_rara                                                                                     | gutmock  | 304.0 (0.14%)  |
| Prevotella_stercorea                                                                                | gutmock  | 553.0 (0.25%)  |
| Prevotella_timonensis                                                                               | gutmock  | 373.0 (0.17%)  |
| Prevotellamassilia_timonensis                                                                       | gutmock  | 460.0 (0.20%)  |
| Pseudoflavonifractor_capillosus                                                                     | gutmock  | 90.0 (0.04%)   |
| Pyramidobacter_piscolens                                                                            | gutmock  | 85.0 (0.04%)   |
| Raoultibacter_massiliensis                                                                          | gutmock  | 27.0 (0.01%)   |
| Raoultibacter_massiliensis-timonensis                                                               | gutmock  | 54.0 (0.02%)   |
| Raoultibacter_timonensis                                                                            | gutmock  | 54.0 (0.02%)   |
| Rarimicrobium_hominis                                                                               | gutmock  | 44.0 (0.02%)   |
| Robinsoniella_peoriensis                                                                            | gutmock  | 48.0 (0.02%)   |
| Romboutsia_timonensis                                                                               | gutmock  | 20.0 (0.01%)   |
| Roseburia_hominis                                                                                   | gutmock  | 414.0 (0.18%)  |
| Roseburia_hominis-intestinalis                                                                      | gutmock  | 2509.0 (1.12%) |
| Roseburia_intestinalis                                                                              | gutmock  | 3537.0 (1.57%) |
| Roseburia_inulinivorans                                                                             | gutmock  | 1503.0 (0.67%) |
| Rothia_mucilaginosa                                                                                 | gutmock  | 12.0 (0.01%)   |
| Ruminococcus_bicirculans                                                                            | gutmock  | 2925.0 (1.30%) |
| Ruminococcus_bromii                                                                                 | gutmock  | 6264.0 (2.79%) |
| Ruminococcus_callidus                                                                               | gutmock  | 839.0 (0.37%)  |
| Ruminococcus_champanellensis                                                                        | gutmock  | 559.0 (0.25%)  |
| Ruminococcus_champanellensis-flavefaciens                                                           | gutmock  | 157.0 (0.07%)  |
| Ruminococcus_flavefaciens                                                                           | gutmock  | 24.0 (0.01%)   |
| Ruminococcus_lactaris                                                                               | gutmock  | 720.0 (0.32%)  |
| Ruminococcus_torques                                                                                | gutmock  | 1098.0 (0.49%) |
| Ruminococcus_torques:[Ruminococcus]_torques                                                         | gutmock  | 732.0 (0.33%)  |
| Ruthenibacterium_lactatiformans                                                                     | gutmock  | 1310.0 (0.58%) |
| Sanguibacteroides_justesenii                                                                        | gutmock  | 20.0 (0.01%)   |
| Sarcina_ventriculi                                                                                  | gutmock  | 8.0 (0.00%)    |
| Schaalia_odontolytica                                                                               | gutmock  | 39.0 (0.02%)   |
| Schaalia_turicensis                                                                                 | gutmock  | 20.0 (0.01%)   |
| Sellimonas_intestinalis                                                                             | gutmock  | 648.0 (0.29%)  |
| Senegalimassilia_anaerobia                                                                          | gutmock  | 24.0 (0.01%)   |
| Slackia_isoflavoniconvertens                                                                        | gutmock  | 86.0 (0.04%)   |
| Sporobacter_termitidis                                                                              | gutmock  | 2859.0 (1.27%) |
| Subdoligranulum_variabile                                                                           | gutmock  | 81.0 (0.04%)   |
| Succiniclasticum_ruminis                                                                            | gutmock  | 74.0 (0.03%)   |
| Sutterella_wadsworthensis                                                                           | gutmock  | 329.0 (0.15%)  |
| Turicibacter_sanguinis                                                                              | gutmock  | 168.0 (0.07%)  |
| Tyzzereella_nexilis                                                                                 | gutmock  | 546.0 (0.24%)  |
| Unknown                                                                                             | gutmock  | 6.0 (0.00%)    |
| Veillonella_denticariosi                                                                            | gutmock  | 60.0 (0.03%)   |
| Veillonella_denticariosi-rodentium                                                                  | gutmock  | 31.0 (0.01%)   |
| Veillonella_infantium                                                                               | gutmock  | 430.0 (0.19%)  |
| Veillonella_rodentium                                                                               | gutmock  | 18.0 (0.01%)   |
| Victivallis_vadensis                                                                                | gutmock  | 260.0 (0.12%)  |
| Winkia_neuui                                                                                        | gutmock  | 9.0 (0.00%)    |
| [Clostridium]_citroniae                                                                             | gutmock  | 12.0 (0.01%)   |
| [Clostridium]_colinum                                                                               | gutmock  | 150.0 (0.07%)  |
| [Clostridium]_innocuum                                                                              | gutmock  | 867.0 (0.39%)  |
| [Clostridium]_methylpentosum                                                                        | gutmock  | 40.0 (0.02%)   |
| [Clostridium]_polysaccharolyticum                                                                   | gutmock  | 12.0 (0.01%)   |
| [Clostridium]_saccharogumia                                                                         | gutmock  | 72.0 (0.03%)   |
| [Clostridium]_scindens                                                                              | gutmock  | 78.0 (0.03%)   |
| [Clostridium]_scindens:[Ruminococcus]_gnavus                                                        | gutmock  | 126.0 (0.06%)  |
| [Clostridium]_spiroforme                                                                            | gutmock  | 287.0 (0.13%)  |
| [Clostridium]_symbiosum                                                                             | gutmock  | 975.0 (0.43%)  |
| [Eubacterium]_biforme                                                                               | gutmock  | 786.0 (0.35%)  |
| [Eubacterium]_biforme:Holdemanella_biformis:Faecalitalea_cylindroides:Faecalibacterium_acidiformans | gutmock  | 508.0 (0.23%)  |
| [Eubacterium]_eligens                                                                               | gutmock  | 4064.0 (1.81%) |
| [Eubacterium]_hallii                                                                                | gutmock  | 3292.0 (1.46%) |

Continued on next page

Supplementary Table 1: Abundance and Relative abundance of the artificial mock communities at the species level.

| Species                                               | mockname    | Abundance      |
|-------------------------------------------------------|-------------|----------------|
| [Eubacterium]_rectale                                 | gutmock     | 6518.0 (2.90%) |
| [Eubacterium]_siraeum                                 | gutmock     | 984.0 (0.44%)  |
| [Ruminococcus]_gnavus                                 | gutmock     | 1868.0 (0.83%) |
| anaerobic_digester                                    | gutmock     | 575.0 (0.26%)  |
| bacterium_ic1379                                      | gutmock     | 8.0 (0.00%)    |
| human_intestinal                                      | gutmock     | 8.0 (0.00%)    |
| Acidobacterium_capsulatum                             | mockrobiota | 6.0 (0.15%)    |
| Acinetobacter_baumannii                               | mockrobiota | 27.0 (0.68%)   |
| Actinomyces_odontolyticus                             | mockrobiota | 15.0 (0.38%)   |
| Akkermansia_muciniphila                               | mockrobiota | 23.0 (0.58%)   |
| Archaeoglobus_fulgidus                                | mockrobiota | 10.0 (0.25%)   |
| Bacillus_cereus                                       | mockrobiota | 107.0 (2.68%)  |
| Bacillus_subtilis                                     | mockrobiota | 15.0 (0.38%)   |
| Bacteroides_cellulosilyticus                          | mockrobiota | 28.0 (0.70%)   |
| Bacteroides_eggerthii                                 | mockrobiota | 9.0 (0.23%)    |
| Bacteroides_fragilis                                  | mockrobiota | 6.0 (0.15%)    |
| Bacteroides_ovatus                                    | mockrobiota | 106.0 (2.65%)  |
| Bacteroides_thetaiotaomicron                          | mockrobiota | 33.0 (0.83%)   |
| Bacteroides_uniformis                                 | mockrobiota | 111.0 (2.78%)  |
| Barnesiella_intestinihominis                          | mockrobiota | 16.0 (0.40%)   |
| Bordetella_bronchiseptica                             | mockrobiota | 6.0 (0.15%)    |
| Burkholderia-Caballeronia-Paraburkholderia_xenovorans | mockrobiota | 12.0 (0.30%)   |
| Caldicellulosiruptor_bescii                           | mockrobiota | 6.0 (0.15%)    |
| Cereibacter_sphaeroides                               | mockrobiota | 71.0 (1.78%)   |
| Chloroflexus_aurantiacus                              | mockrobiota | 26.0 (0.65%)   |
| Clostridium_beijerinckii                              | mockrobiota | 150.0 (3.75%)  |
| Clostridium_beijerinckii-sensu                        | mockrobiota | 226.0 (5.65%)  |
| Clostridium_sensu_stricto_11_acetobutylicum           | mockrobiota | 21.0 (0.53%)   |
| Clostridium_sensu_stricto_1_beijerinckii              | mockrobiota | 110.0 (2.75%)  |
| Clostridium_sensu_stricto_1_celatum                   | mockrobiota | 12.0 (0.30%)   |
| Coprococcus_comes                                     | mockrobiota | 20.0 (0.50%)   |
| Cutibacterium_acnes                                   | mockrobiota | 71.0 (1.78%)   |
| Deinococcus_grandis                                   | mockrobiota | 12.0 (0.30%)   |
| Deinococcus_radiodurans                               | mockrobiota | 95.0 (2.38%)   |
| Desulfitobacterium_hafniense                          | mockrobiota | 12.0 (0.30%)   |
| Desulfovibrio_piger                                   | mockrobiota | 50.0 (1.25%)   |
| Desulfovibrio_vulgaris                                | mockrobiota | 12.0 (0.30%)   |
| Dickeya_dadantii                                      | mockrobiota | 92.0 (2.30%)   |
| Dictyoglomus_turgidum                                 | mockrobiota | 6.0 (0.15%)    |
| Enterococcus_faecalis                                 | mockrobiota | 130.0 (3.25%)  |
| Escherichia-Shigella_coli                             | mockrobiota | 44.0 (1.10%)   |
| Escherichia-Shigella_coli:Escherichia_coli            | mockrobiota | 68.0 (1.70%)   |
| Escherichia_coli                                      | mockrobiota | 105.0 (2.63%)  |
| Fusobacterium_nucleatum                               | mockrobiota | 79.0 (1.98%)   |
| Gemmatimonas_aurantiaca                               | mockrobiota | 21.0 (0.53%)   |
| Helicobacter_pylori                                   | mockrobiota | 22.0 (0.55%)   |
| Herpetosiphon_aurantiacus                             | mockrobiota | 32.0 (0.80%)   |
| Howardella_ureilytica                                 | mockrobiota | 12.0 (0.30%)   |
| Ignicoccus_hospitalis                                 | mockrobiota | 6.0 (0.15%)    |
| Lactobacillus_gasseri                                 | mockrobiota | 24.0 (0.60%)   |
| Leptothrix_cholodnii                                  | mockrobiota | 6.0 (0.15%)    |
| Listeria_monocytogenes                                | mockrobiota | 119.0 (2.98%)  |
| Methanobrevibacter_smithii                            | mockrobiota | 20.0 (0.50%)   |
| Methanocaldococcus_jannaschii                         | mockrobiota | 9.0 (0.23%)    |
| Methanococcus_maripaludis                             | mockrobiota | 14.0 (0.35%)   |
| Microlunatus_phosphovorus                             | mockrobiota | 9.0 (0.23%)    |
| Nanoarchaeum_equitans                                 | mockrobiota | 2.0 (0.05%)    |
| Neisseria_meningitidis                                | mockrobiota | 22.0 (0.55%)   |
| Nitrobacter_winogradskyi                              | mockrobiota | 9.0 (0.23%)    |
| Nitrosomonas_europaea                                 | mockrobiota | 21.0 (0.53%)   |
| Parabacteroides_distasonis                            | mockrobiota | 24.0 (0.60%)   |
| Parabacteroides_merdae                                | mockrobiota | 85.0 (2.13%)   |
| Paraprevotella_clara                                  | mockrobiota | 10.0 (0.25%)   |

Continued on next page

Supplementary Table 1: Abundance and Relative abundance of the artificial mock communities at the species level.

| Species                                           | mockname    | Abundance       |
|---------------------------------------------------|-------------|-----------------|
| Pelodictyon_phaeoclathratiforme                   | mockrobiota | 43.0 (1.08%)    |
| Pelolinea_thermophila                             | mockrobiota | 12.0 (0.30%)    |
| Persephonella_marina                              | mockrobiota | 4.0 (0.10%)     |
| Phocaeicola_massiliensis                          | mockrobiota | 12.0 (0.30%)    |
| Phocaeicola_vulgatus                              | mockrobiota | 295.0 (7.38%)   |
| Porphyromonas_gingivalis                          | mockrobiota | 90.0 (2.25%)    |
| Prevotella_buccalis                               | mockrobiota | 6.0 (0.15%)     |
| Prevotella_copri                                  | mockrobiota | 37.0 (0.93%)    |
| Pseudomonas_aeruginosa                            | mockrobiota | 76.0 (1.90%)    |
| Pseudomonas_putida                                | mockrobiota | 12.0 (0.30%)    |
| Pyrobaculum_aerophilum                            | mockrobiota | 3.0 (0.08%)     |
| Pyrobaculum_calidifontis                          | mockrobiota | 6.0 (0.15%)     |
| Pyrococcus_horikoshii                             | mockrobiota | 8.0 (0.20%)     |
| Rhodopirellula_baltica                            | mockrobiota | 8.0 (0.20%)     |
| Roseburia_inulinivorans                           | mockrobiota | 6.0 (0.15%)     |
| Ruegeria_pomeroi                                  | mockrobiota | 12.0 (0.30%)    |
| Salinispora_arenicola                             | mockrobiota | 9.0 (0.23%)     |
| Salinispora_arenicola-tropica                     | mockrobiota | 2.0 (0.05%)     |
| Salinispora_tropica                               | mockrobiota | 12.0 (0.30%)    |
| Shewanella_baltica                                | mockrobiota | 290.0 (7.25%)   |
| Staphylococcus_aureus                             | mockrobiota | 65.0 (1.63%)    |
| Staphylococcus_aureus-epidermidis                 | mockrobiota | 118.0 (2.95%)   |
| Staphylococcus_epidermidis                        | mockrobiota | 102.0 (2.55%)   |
| Streptococcus_agalactiae                          | mockrobiota | 18.0 (0.45%)    |
| Streptococcus_mutans                              | mockrobiota | 73.0 (1.83%)    |
| Streptococcus_pneumoniae                          | mockrobiota | 23.0 (0.58%)    |
| Sulfurihydrogenibium_yellowstonense               | mockrobiota | 29.0 (0.73%)    |
| Sulfurisphaera_tokodaii                           | mockrobiota | 4.0 (0.10%)     |
| Thermotoga_neapolitana                            | mockrobiota | 16.0 (0.40%)    |
| Thermotoga_neapolitana-petrophila                 | mockrobiota | 6.0 (0.15%)     |
| Thermotoga_petrophila                             | mockrobiota | 12.0 (0.30%)    |
| Thermus_thermophilus                              | mockrobiota | 6.0 (0.15%)     |
| Treponema_bryantii                                | mockrobiota | 30.0 (0.75%)    |
| Treponema_denticola                               | mockrobiota | 39.0 (0.98%)    |
| Treponema_vincentii                               | mockrobiota | 6.0 (0.15%)     |
| Zymomonas_mobilis                                 | mockrobiota | 12.0 (0.30%)    |
| [Clostridium]_cocleatum                           | mockrobiota | 6.0 (0.15%)     |
| [Clostridium]_methylpentosum                      | mockrobiota | 14.0 (0.35%)    |
| [Clostridium]_methylpentosum_group_methylpentosum | mockrobiota | 22.0 (0.55%)    |
| [Ruminococcus]_gnavus                             | mockrobiota | 16.0 (0.40%)    |
| [Ruminococcus]_gnavus_group_gnavus                | mockrobiota | 24.0 (0.60%)    |
| Aerococcus_christensenii                          | vagimock    | 74.0 (0.03%)    |
| Alloscardovia_omnicolens                          | vagimock    | 450.0 (0.19%)   |
| Anaerococcus_obesiensis                           | vagimock    | 4.0 (0.00%)     |
| Anaerococcus_prevotii                             | vagimock    | 25.0 (0.01%)    |
| Anaeroglobus_geminatus                            | vagimock    | 124.0 (0.05%)   |
| Bacteroides_uniformis                             | vagimock    | 21.0 (0.01%)    |
| Bacteroides_uniformis:Phocaeicola_vulgatus        | vagimock    | 11.0 (0.00%)    |
| Bifidobacterium_bifidum                           | vagimock    | 6.0 (0.00%)     |
| Bifidobacterium_dentium                           | vagimock    | 1276.0 (0.55%)  |
| Blautia_faecis                                    | vagimock    | 4.0 (0.00%)     |
| Blautia_obeum                                     | vagimock    | 6.0 (0.00%)     |
| Clostridium_perfringens                           | vagimock    | 33.0 (0.01%)    |
| Dialister_micraerophilus                          | vagimock    | 106.0 (0.05%)   |
| Dialister_succinatiphilus                         | vagimock    | 28.0 (0.01%)    |
| Eubacterium_coprostanoligenes                     | vagimock    | 28.0 (0.01%)    |
| Faecalibacterium_prausnitzii                      | vagimock    | 66.0 (0.03%)    |
| Fannyhessea_vaginae                               | vagimock    | 1954.0 (0.84%)  |
| Fenollaria_massiliensis                           | vagimock    | 8.0 (0.00%)     |
| Fingoldia_magna                                   | vagimock    | 46.0 (0.02%)    |
| Fusicatenibacter_saccharivorans                   | vagimock    | 14.0 (0.01%)    |
| Gardnerella_vaginalis                             | vagimock    | 13085.0 (5.60%) |
| Howardella_ureilytica                             | vagimock    | 610.0 (0.26%)   |

Continued on next page

Supplementary Table 1: Abundance and Relative abundance of the artificial mock communities at the species level.

| Species                             | mockname | Abundance         |
|-------------------------------------|----------|-------------------|
| Lactobacillus_crispatus             | vagimock | 57030.0 (24.39%)  |
| Lactobacillus_crispatus-delbrueckii | vagimock | 984.0 (0.42%)     |
| Lactobacillus_delbrueckii           | vagimock | 54.0 (0.02%)      |
| Lactobacillus_gasseri               | vagimock | 7381.0 (3.16%)    |
| Lactobacillus_iners                 | vagimock | 143924.0 (61.56%) |
| Lactobacillus_jensenii              | vagimock | 4419.0 (1.89%)    |
| Limosilactobacillus_coleohominis    | vagimock | 6.0 (0.00%)       |
| Limosilactobacillus_pontis          | vagimock | 27.0 (0.01%)      |
| Limosilactobacillus_vaginalis       | vagimock | 81.0 (0.03%)      |
| Mediterraneibacter_faecis           | vagimock | 6.0 (0.00%)       |
| Megasphaera_stantonii               | vagimock | 294.0 (0.13%)     |
| Metamycoplasma_hominis              | vagimock | 20.0 (0.01%)      |
| Monoglobus_pectinilyticus           | vagimock | 8.0 (0.00%)       |
| Parabacteroides_distasonis          | vagimock | 9.0 (0.00%)       |
| Peptoniphilus_duerdenii             | vagimock | 6.0 (0.00%)       |
| Phocaeicola_vulgatus                | vagimock | 42.0 (0.02%)      |
| Porphyromonas_uenonis               | vagimock | 16.0 (0.01%)      |
| Prevotella_amnii                    | vagimock | 9.0 (0.00%)       |
| Prevotella_bivia                    | vagimock | 606.0 (0.26%)     |
| Prevotella_buccalis                 | vagimock | 12.0 (0.01%)      |
| Prevotella_colorans                 | vagimock | 28.0 (0.01%)      |
| Prevotella_copri                    | vagimock | 242.0 (0.10%)     |
| Prevotella_timonensis               | vagimock | 334.0 (0.14%)     |
| Roseburia_faecis                    | vagimock | 6.0 (0.00%)       |
| Ruminococcus_bicirculans            | vagimock | 10.0 (0.00%)      |
| Ruminococcus_bromii                 | vagimock | 9.0 (0.00%)       |
| Sporobacter_termitidis              | vagimock | 31.0 (0.01%)      |
| Streptococcus_agalactiae            | vagimock | 80.0 (0.03%)      |
| Ureaplasma_urealyticum              | vagimock | 90.0 (0.04%)      |
| Winkia_neunii                       | vagimock | 6.0 (0.00%)       |
| [Eubacterium]_hallii                | vagimock | 12.0 (0.01%)      |
| anaerobic_digester                  | vagimock | 25.0 (0.01%)      |



Supplementary Table 2: N-gram-range and confidence threshold benchmarking at family level. F1-score, precision and recall are shown for each database, evaluated region and validation datasets. The values are the average of the five metagenomic samples. Bold represents the highest value.

| Validation Dataset | Region     | Database  | Metrics   | Conf. thres.<br>N-gram | 0.5         | 0.7         | 0.9         | 0.98        | disable |
|--------------------|------------|-----------|-----------|------------------------|-------------|-------------|-------------|-------------|---------|
| V1-V3              | GSR        | F1-score  | [6,6]     | <b>1.00</b>            | 0.99        | 0.99        | 0.99        | <b>1.00</b> |         |
|                    |            |           | [7,7]     | <b>1.00</b>            | 0.99        | 0.99        | 0.99        | <b>1.00</b> |         |
|                    |            | Precision | [6,6]     | <b>1.00</b>            | <b>1.00</b> | <b>1.00</b> | <b>1.00</b> | <b>1.00</b> |         |
|                    |            |           | [7,7]     | <b>1.00</b>            | <b>1.00</b> | <b>1.00</b> | <b>1.00</b> | <b>1.00</b> |         |
|                    |            | Recall    | [6,6]     | <b>1.00</b>            | 0.99        | 0.99        | 0.99        | <b>1.00</b> |         |
|                    |            |           | [7,7]     | <b>1.00</b>            | 0.99        | 0.99        | 0.99        | <b>1.00</b> |         |
|                    |            | GTDB      | F1-score  | [6,6]                  | 0.98        | 0.96        | 0.95        | 0.95        | 0.98    |
|                    |            |           |           | [7,7]                  | 0.98        | 0.97        | 0.96        | 0.95        | 0.98    |
|                    |            |           | Precision | [6,6]                  | 0.99        | 0.98        | 0.99        | 0.99        | 0.98    |
|                    |            |           |           | [7,7]                  | 0.99        | 0.99        | 0.99        | 0.98        | 0.98    |
|                    |            |           | Recall    | [6,6]                  | 0.98        | 0.95        | 0.93        | 0.92        | 0.98    |
|                    |            |           |           | [7,7]                  | 0.98        | 0.95        | 0.93        | 0.92        | 0.98    |
|                    | Greengenes | F1-score  | [6,6]     | 0.96                   | 0.96        | 0.95        | 0.95        | 0.96        |         |
|                    |            |           | [7,7]     | 0.96                   | 0.96        | 0.96        | 0.95        | 0.96        |         |
|                    |            | Precision | [6,6]     | 0.97                   | 0.97        | 0.96        | 0.97        | 0.97        |         |
|                    |            |           | [7,7]     | 0.97                   | 0.97        | 0.97        | 0.97        | 0.97        |         |
|                    |            | Recall    | [6,6]     | 0.95                   | 0.95        | 0.95        | 0.93        | 0.95        |         |
|                    |            |           | [7,7]     | 0.96                   | 0.95        | 0.95        | 0.95        | 0.95        |         |
|                    | ITGDB      | F1-score  | [6,6]     | 0.95                   | 0.89        | 0.83        | 0.77        | 0.98        |         |
|                    |            |           | [7,7]     | 0.95                   | 0.87        | 0.83        | 0.78        | 0.98        |         |
|                    |            | Precision | [6,6]     | 0.97                   | 0.97        | 0.97        | 0.97        | 0.98        |         |
|                    |            |           | [7,7]     | 0.97                   | 0.97        | 0.97        | 0.97        | 0.98        |         |
|                    |            | Recall    | [6,6]     | 0.95                   | 0.85        | 0.75        | 0.68        | 0.98        |         |
|                    |            |           | [7,7]     | 0.94                   | 0.81        | 0.76        | 0.69        | 0.98        |         |
| RDP                | F1-score   | [6,6]     | 0.97      | 0.97                   | 0.96        | 0.96        | 0.97        |             |         |
|                    |            | [7,7]     | 0.97      | 0.97                   | 0.97        | 0.97        | 0.97        |             |         |
|                    | Precision  | [6,6]     | 0.97      | 0.97                   | 0.97        | 0.97        | 0.97        |             |         |
|                    |            | [7,7]     | 0.97      | 0.97                   | 0.97        | 0.97        | 0.97        |             |         |
|                    | Recall     | [6,6]     | 0.97      | 0.97                   | 0.97        | 0.96        | 0.97        |             |         |
|                    |            | [7,7]     | 0.97      | 0.97                   | 0.97        | 0.97        | 0.97        |             |         |
| SILVA              | F1-score   | [6,6]     | 0.99      | 0.99                   | 0.99        | 0.99        | 0.99        |             |         |
|                    |            | [7,7]     | 0.99      | 0.99                   | 0.99        | 0.99        | 0.99        |             |         |
|                    | Precision  | [6,6]     | 0.99      | 0.99                   | 0.99        | 0.99        | 0.99        |             |         |
|                    |            | [7,7]     | 0.99      | 0.99                   | 0.99        | 0.99        | 0.99        |             |         |
|                    | Recall     | [6,6]     | 0.99      | 0.99                   | 0.99        | 0.98        | 0.99        |             |         |
|                    |            | [7,7]     | 0.99      | 0.99                   | 0.99        | 0.99        | 0.99        |             |         |
| V3-V4              | GSR        | F1-score  | [6,6]     | <b>1.00</b>            | <b>1.00</b> | <b>1.00</b> | 0.99        | <b>1.00</b> |         |
|                    |            |           | [7,7]     | <b>1.00</b>            | <b>1.00</b> | <b>1.00</b> | 0.99        | <b>1.00</b> |         |
|                    |            | Precision | [6,6]     | <b>1.00</b>            | <b>1.00</b> | <b>1.00</b> | <b>1.00</b> | <b>1.00</b> |         |
|                    |            |           | [7,7]     | <b>1.00</b>            | <b>1.00</b> | <b>1.00</b> | <b>1.00</b> | <b>1.00</b> |         |
|                    |            | Recall    | [6,6]     | 0.99                   | 0.99        | 0.99        | 0.99        | 0.99        |         |
|                    |            |           | [7,7]     | 0.99                   | 0.99        | 0.99        | 0.99        | 0.99        |         |
|                    | GTDB       | F1-score  | [6,6]     | 0.95                   | 0.93        | 0.93        | 0.89        | 0.96        |         |
|                    |            |           | [7,7]     | 0.94                   | 0.93        | 0.92        | 0.89        | 0.96        |         |
|                    |            | Precision | [6,6]     | 0.98                   | 0.98        | 0.98        | 0.97        | 0.98        |         |
|                    |            |           | [7,7]     | 0.98                   | 0.98        | 0.98        | 0.97        | 0.98        |         |
|                    |            | Recall    | [6,6]     | 0.94                   | 0.91        | 0.91        | 0.84        | 0.96        |         |
|                    |            |           | [7,7]     | 0.92                   | 0.91        | 0.90        | 0.85        | 0.96        |         |
| Greengenes         | F1-score   | [6,6]     | 0.95      | 0.94                   | 0.94        | 0.93        | 0.95        |             |         |
|                    |            | [7,7]     | 0.95      | 0.95                   | 0.94        | 0.94        | 0.95        |             |         |
|                    | Precision  | [6,6]     | 0.96      | 0.95                   | 0.95        | 0.95        | 0.96        |             |         |
|                    |            | [7,7]     | 0.96      | 0.96                   | 0.95        | 0.95        | 0.96        |             |         |
|                    | Recall     | [6,6]     | 0.95      | 0.94                   | 0.94        | 0.93        | 0.95        |             |         |
|                    |            | [7,7]     | 0.95      | 0.95                   | 0.94        | 0.94        | 0.95        |             |         |
| ITGDB              | F1-score   | [6,6]     | 0.93      | 0.80                   | 0.68        | 0.58        | 0.98        |             |         |
|                    |            | [7,7]     | 0.93      | 0.79                   | 0.68        | 0.60        | 0.98        |             |         |
|                    | Precision  | [6,6]     | 0.97      | 0.95                   | 0.96        | 0.92        | 0.99        |             |         |
|                    |            | [7,7]     | 0.98      | 0.96                   | 0.96        | 0.93        | 0.99        |             |         |
|                    | Recall     | [6,6]     | 0.90      | 0.73                   | 0.58        | 0.49        | 0.98        |             |         |
|                    |            | [7,7]     | 0.89      | 0.71                   | 0.58        | 0.50        | 0.98        |             |         |

Continued on next page

Supplementary Table 2: N-gram-range and confidence threshold benchmarking at family level. F1-score, precision and recall are shown for each database, evaluated region and validation datasets. The values are the average of the five metagenomic samples. Bold represents the highest value.

| Validation Dataset | Region    | Database    | Metrics     | Conf. thres.<br>N-gram | 0.5         | 0.7         | 0.9         | 0.98        | disable     |
|--------------------|-----------|-------------|-------------|------------------------|-------------|-------------|-------------|-------------|-------------|
| V3-V5              | V3        | RDP         | F1-score    | [6,6]                  | 0.98        | 0.98        | 0.98        | 0.98        | 0.98        |
|                    |           |             |             | [7,7]                  | 0.98        | 0.98        | 0.98        | 0.98        | 0.98        |
|                    |           |             | Precision   | [6,6]                  | 0.99        | 0.99        | 0.99        | 0.99        | 0.99        |
|                    |           |             |             | [7,7]                  | 0.99        | 0.99        | 0.99        | 0.99        | 0.99        |
|                    |           | Recall      | [6,6]       | 0.98                   | 0.98        | 0.98        | 0.98        | 0.98        |             |
|                    |           |             | [7,7]       | 0.98                   | 0.98        | 0.98        | 0.98        | 0.98        |             |
|                    |           | SILVA       | F1-score    | [6,6]                  | 0.99        | 0.98        | 0.97        | 0.95        | 0.99        |
|                    |           |             |             | [7,7]                  | 0.99        | 0.99        | 0.98        | 0.98        | 0.99        |
|                    |           |             | Precision   | [6,6]                  | <b>1.00</b> | 0.99        | 0.98        | 0.96        | <b>1.00</b> |
|                    |           |             |             | [7,7]                  | <b>1.00</b> | <b>1.00</b> | 0.99        | 0.98        | <b>1.00</b> |
|                    |           | Recall      | [6,6]       | 0.99                   | 0.98        | 0.97        | 0.96        | 0.99        |             |
|                    |           |             | [7,7]       | 0.98                   | 0.99        | 0.98        | 0.98        | 0.98        |             |
|                    | GSR       | F1-score    | [6,6]       | <b>1.00</b>            | 0.99        | 0.99        | 0.98        | <b>1.00</b> |             |
|                    |           |             | [7,7]       | <b>1.00</b>            | <b>1.00</b> | <b>1.00</b> | 0.98        | <b>1.00</b> |             |
|                    |           | Precision   | [6,6]       | <b>1.00</b>            | 0.99        | 0.99        | 0.99        | <b>1.00</b> |             |
|                    |           |             | [7,7]       | <b>1.00</b>            | <b>1.00</b> | <b>1.00</b> | 0.99        | <b>1.00</b> |             |
|                    | Recall    | [6,6]       | <b>1.00</b> | 0.99                   | 0.99        | 0.98        | <b>1.00</b> |             |             |
|                    |           | [7,7]       | <b>1.00</b> | <b>1.00</b>            | <b>1.00</b> | 0.98        | <b>1.00</b> |             |             |
|                    | GTDB      | F1-score    | [6,6]       | 0.96                   | 0.95        | 0.93        | 0.90        | 0.97        |             |
|                    |           |             | [7,7]       | 0.95                   | 0.94        | 0.93        | 0.89        | 0.96        |             |
|                    |           | Precision   | [6,6]       | 0.98                   | 0.98        | 0.98        | 0.96        | 0.98        |             |
|                    |           |             | [7,7]       | 0.98                   | 0.98        | 0.98        | 0.98        | 0.97        |             |
|                    | Recall    | [6,6]       | 0.95        | 0.93                   | 0.90        | 0.86        | 0.97        |             |             |
|                    |           | [7,7]       | 0.94        | 0.92                   | 0.90        | 0.84        | 0.96        |             |             |
| Greengenes         | F1-score  | [6,6]       | 0.95        | 0.95                   | 0.94        | 0.94        | 0.95        |             |             |
|                    |           | [7,7]       | 0.95        | 0.95                   | 0.95        | 0.94        | 0.95        |             |             |
|                    | Precision | [6,6]       | 0.95        | 0.96                   | 0.95        | 0.94        | 0.95        |             |             |
|                    |           | [7,7]       | 0.96        | 0.95                   | 0.96        | 0.95        | 0.95        |             |             |
| Recall             | [6,6]     | 0.95        | 0.95        | 0.94                   | 0.94        | 0.95        |             |             |             |
|                    | [7,7]     | 0.95        | 0.95        | 0.95                   | 0.94        | 0.94        |             |             |             |
| ITGDB              | F1-score  | [6,6]       | 0.94        | 0.85                   | 0.77        | 0.63        | 0.99        |             |             |
|                    |           | [7,7]       | 0.94        | 0.83                   | 0.77        | 0.64        | 0.99        |             |             |
|                    | Precision | [6,6]       | 0.96        | 0.97                   | 0.97        | 0.96        | 0.99        |             |             |
|                    |           | [7,7]       | 0.96        | 0.97                   | 0.97        | 0.97        | 0.99        |             |             |
| Recall             | [6,6]     | 0.93        | 0.79        | 0.68                   | 0.51        | 0.99        |             |             |             |
|                    | [7,7]     | 0.92        | 0.75        | 0.67                   | 0.52        | 0.99        |             |             |             |
| RDP                | F1-score  | [6,6]       | 0.99        | 0.99                   | 0.97        | 0.97        | 0.98        |             |             |
|                    |           | [7,7]       | 0.98        | 0.99                   | 0.99        | 0.97        | 0.98        |             |             |
|                    | Precision | [6,6]       | 0.99        | 0.99                   | 0.98        | 0.97        | 0.99        |             |             |
|                    |           | [7,7]       | 0.99        | 0.99                   | 0.99        | 0.98        | 0.99        |             |             |
| Recall             | [6,6]     | 0.98        | 0.98        | 0.98                   | 0.97        | 0.98        |             |             |             |
|                    | [7,7]     | 0.98        | 0.99        | 0.99                   | 0.97        | 0.98        |             |             |             |
| SILVA              | F1-score  | [6,6]       | 0.98        | 0.98                   | 0.97        | 0.96        | 0.98        |             |             |
|                    |           | [7,7]       | 0.98        | 0.98                   | 0.98        | 0.97        | 0.98        |             |             |
|                    | Precision | [6,6]       | 0.98        | 0.98                   | 0.97        | 0.98        | 0.98        |             |             |
|                    |           | [7,7]       | 0.98        | 0.98                   | 0.98        | 0.97        | 0.98        |             |             |
| Recall             | [6,6]     | 0.98        | 0.98        | 0.97                   | 0.97        | 0.98        |             |             |             |
|                    | [7,7]     | 0.98        | 0.98        | 0.98                   | 0.98        | 0.97        |             |             |             |
| GSR                | F1-score  | [6,6]       | <b>1.00</b> | <b>1.00</b>            | 0.99        | 0.98        | <b>1.00</b> |             |             |
|                    |           | [7,7]       | <b>1.00</b> | <b>1.00</b>            | 0.99        | 0.99        | <b>1.00</b> |             |             |
|                    | Precision | [6,6]       | <b>1.00</b> | <b>1.00</b>            | <b>1.00</b> | <b>1.00</b> | <b>1.00</b> |             |             |
|                    |           | [7,7]       | <b>1.00</b> | <b>1.00</b>            | <b>1.00</b> | <b>1.00</b> | <b>1.00</b> |             |             |
| Recall             | [6,6]     | <b>1.00</b> | <b>1.00</b> | 0.99                   | 0.97        | <b>1.00</b> |             |             |             |
|                    | [7,7]     | <b>1.00</b> | <b>1.00</b> | 0.99                   | 0.98        | <b>1.00</b> |             |             |             |
| GTDB               | F1-score  | [6,6]       | 0.92        | 0.92                   | 0.88        | 0.73        | 0.95        |             |             |
|                    |           | [7,7]       | 0.92        | 0.91                   | 0.89        | 0.77        | 0.95        |             |             |
|                    | Precision | [6,6]       | 0.98        | 0.98                   | 0.96        | 0.93        | 0.98        |             |             |
|                    |           | [7,7]       | 0.97        | 0.97                   | 0.96        | 0.94        | 0.97        |             |             |
| Recall             | [6,6]     | 0.89        | 0.88        | 0.84                   | 0.63        | 0.94        |             |             |             |
|                    | [7,7]     | 0.89        | 0.88        | 0.85                   | 0.67        | 0.93        |             |             |             |
|                    |           |             | F1-score    | [6,6]                  | 0.95        | 0.94        | 0.95        | 0.92        | 0.95        |

Continued on next page

Supplementary Table 2: N-gram-range and confidence threshold benchmarking at family level. F1-score, precision and recall are shown for each database, evaluated region and validation datasets. The values are the average of the five metagenomic samples. Bold represents the highest value.

| Validation Dataset | Region     | Database    | Metrics     | Conf. thres.<br>N-gram | 0.5         | 0.7         | 0.9         | 0.98        | disable     |
|--------------------|------------|-------------|-------------|------------------------|-------------|-------------|-------------|-------------|-------------|
| full-16S           | GSR        | ITGDB       | Precision   | [7,7]                  | 0.95        | 0.95        | 0.94        | 0.94        | 0.95        |
|                    |            |             |             | [6,6]                  | <b>0.96</b> | <b>0.96</b> | <b>0.96</b> | <b>0.95</b> | <b>0.96</b> |
|                    |            |             |             | [7,7]                  | 0.96        | 0.96        | 0.96        | 0.95        | 0.96        |
|                    |            | Recall      | [6,6]       | <b>0.95</b>            | <b>0.94</b> | <b>0.94</b> | <b>0.92</b> | <b>0.95</b> |             |
|                    |            |             | [7,7]       | 0.94                   | 0.95        | 0.94        | 0.94        | 0.95        |             |
|                    |            |             | [7,7]       | <b>0.93</b>            | <b>0.76</b> | <b>0.63</b> | <b>0.47</b> | <b>0.99</b> |             |
|                    |            | F1-score    | [6,6]       | <b>0.98</b>            | <b>0.97</b> | <b>0.94</b> | <b>0.93</b> | <b>0.99</b> |             |
|                    |            |             | [7,7]       | 0.98                   | 0.97        | 0.94        | 0.93        | 0.99        |             |
|                    |            |             | [7,7]       | <b>0.91</b>            | <b>0.67</b> | <b>0.52</b> | <b>0.35</b> | <b>0.98</b> |             |
|                    |            | RDP         | Recall      | [6,6]                  | <b>0.91</b> | <b>0.68</b> | <b>0.52</b> | <b>0.37</b> | <b>0.98</b> |
|                    |            |             |             | [7,7]                  | 0.91        | 0.68        | 0.52        | 0.37        | 0.98        |
|                    |            |             |             | [7,7]                  | <b>0.98</b> | <b>0.98</b> | <b>0.98</b> | <b>0.97</b> | <b>0.98</b> |
|                    | SILVA      | F1-score    | [6,6]       | <b>0.98</b>            | <b>0.98</b> | <b>0.98</b> | <b>0.98</b> | <b>0.98</b> |             |
|                    |            |             | [7,7]       | 0.98                   | 0.98        | 0.98        | 0.98        | 0.98        |             |
|                    |            |             | [7,7]       | <b>0.99</b>            | <b>0.99</b> | <b>0.99</b> | <b>0.99</b> | <b>0.99</b> |             |
|                    | Precision  | [6,6]       | <b>0.99</b> | <b>0.99</b>            | <b>0.99</b> | <b>0.99</b> | <b>0.99</b> |             |             |
|                    |            | [7,7]       | 0.99        | 0.99                   | 0.99        | 0.99        | 0.99        |             |             |
|                    |            | [7,7]       | <b>0.98</b> | <b>0.98</b>            | <b>0.98</b> | <b>0.96</b> | <b>0.98</b> |             |             |
|                    | Recall     | [6,6]       | <b>0.98</b> | <b>0.98</b>            | <b>0.98</b> | <b>0.98</b> | <b>0.98</b> |             |             |
|                    |            | [7,7]       | 0.98        | 0.98                   | 0.98        | 0.98        | 0.98        |             |             |
|                    |            | [7,7]       | <b>0.99</b> | <b>0.99</b>            | <b>0.98</b> | <b>0.93</b> | <b>0.99</b> |             |             |
|                    | SILVA      | Precision   | [6,6]       | <b>0.99</b>            | <b>0.99</b> | <b>0.99</b> | <b>0.98</b> | <b>1.00</b> |             |
|                    |            |             | [7,7]       | <b>1.00</b>            | <b>1.00</b> | 0.99        | 0.98        | <b>1.00</b> |             |
|                    |            |             | [7,7]       | <b>0.99</b>            | <b>0.99</b> | <b>0.98</b> | <b>0.91</b> | <b>0.99</b> |             |
|                    | Recall     | [6,6]       | <b>0.99</b> | <b>0.99</b>            | <b>0.98</b> | <b>0.91</b> | <b>0.99</b> |             |             |
|                    |            | [7,7]       | 0.99        | 0.99                   | 0.98        | 0.95        | 0.98        |             |             |
|                    |            | [7,7]       | <b>1.00</b> | <b>1.00</b>            | <b>1.00</b> | 0.99        | <b>1.00</b> |             |             |
|                    | GSR        | F1-score    | [6,6]       | <b>1.00</b>            | <b>1.00</b> | <b>1.00</b> | <b>1.00</b> | <b>1.00</b> |             |
|                    |            |             | [7,7]       | <b>1.00</b>            | <b>1.00</b> | <b>1.00</b> | <b>1.00</b> | <b>1.00</b> |             |
|                    |            |             | [7,7]       | <b>1.00</b>            | <b>1.00</b> | <b>1.00</b> | 0.99        | <b>1.00</b> |             |
|                    | Precision  | [6,6]       | <b>1.00</b> | <b>1.00</b>            | <b>1.00</b> | <b>1.00</b> | <b>1.00</b> |             |             |
|                    |            | [7,7]       | <b>1.00</b> | <b>1.00</b>            | <b>1.00</b> | <b>1.00</b> | <b>1.00</b> |             |             |
|                    |            | [7,7]       | <b>1.00</b> | <b>1.00</b>            | <b>1.00</b> | 0.98        | <b>1.00</b> |             |             |
|                    | Recall     | [6,6]       | <b>1.00</b> | <b>1.00</b>            | <b>1.00</b> | <b>1.00</b> | <b>1.00</b> |             |             |
|                    |            | [7,7]       | <b>1.00</b> | <b>1.00</b>            | <b>1.00</b> | <b>1.00</b> | <b>1.00</b> |             |             |
|                    |            | [7,7]       | <b>0.92</b> | <b>0.85</b>            | <b>0.82</b> | <b>0.78</b> | <b>0.92</b> |             |             |
|                    | GTDB       | F1-score    | [6,6]       | <b>0.93</b>            | <b>0.92</b> | <b>0.91</b> | <b>0.91</b> | <b>0.93</b> |             |
|                    |            |             | [7,7]       | 0.93                   | 0.92        | 0.91        | 0.91        | 0.93        |             |
|                    |            |             | [7,7]       | <b>0.93</b>            | <b>0.96</b> | <b>0.94</b> | <b>0.94</b> | <b>0.93</b> |             |
|                    | Precision  | [6,6]       | <b>0.95</b> | <b>0.95</b>            | <b>0.95</b> | <b>0.96</b> | <b>0.95</b> |             |             |
|                    |            | [7,7]       | 0.95        | 0.95                   | 0.95        | 0.96        | 0.95        |             |             |
|                    |            | [7,7]       | <b>0.91</b> | <b>0.81</b>            | <b>0.78</b> | <b>0.73</b> | <b>0.92</b> |             |             |
|                    | Recall     | [6,6]       | <b>0.92</b> | <b>0.91</b>            | <b>0.89</b> | <b>0.88</b> | <b>0.92</b> |             |             |
|                    |            | [7,7]       | 0.92        | 0.91                   | 0.89        | 0.88        | 0.92        |             |             |
|                    |            | [7,7]       | <b>0.94</b> | <b>0.94</b>            | <b>0.94</b> | <b>0.93</b> | <b>0.94</b> |             |             |
|                    | Greengenes | F1-score    | [6,6]       | <b>0.95</b>            | <b>0.95</b> | <b>0.94</b> | <b>0.94</b> | <b>0.95</b> |             |
|                    |            |             | [7,7]       | 0.95                   | 0.95        | 0.94        | 0.94        | 0.95        |             |
|                    |            |             | [7,7]       | <b>0.96</b>            | <b>0.95</b> | <b>0.96</b> | <b>0.96</b> | <b>0.96</b> |             |
| Precision          | [6,6]      | <b>0.96</b> | <b>0.95</b> | <b>0.96</b>            | <b>0.96</b> | <b>0.96</b> |             |             |             |
|                    | [7,7]      | 0.96        | 0.96        | 0.96                   | 0.96        | 0.96        |             |             |             |
|                    | [7,7]      | <b>0.94</b> | <b>0.93</b> | <b>0.94</b>            | <b>0.91</b> | <b>0.94</b> |             |             |             |
| Recall             | [6,6]      | <b>0.94</b> | <b>0.94</b> | <b>0.94</b>            | <b>0.94</b> | <b>0.94</b> |             |             |             |
|                    | [7,7]      | 0.94        | 0.94        | 0.94                   | 0.94        | 0.94        |             |             |             |
|                    | [7,7]      | <b>0.97</b> | <b>0.91</b> | <b>0.83</b>            | <b>0.71</b> | <b>0.99</b> |             |             |             |
| ITGDB              | F1-score   | [6,6]       | <b>0.97</b> | <b>0.92</b>            | <b>0.83</b> | <b>0.74</b> | <b>0.99</b> |             |             |
|                    |            | [7,7]       | 0.97        | 0.92                   | 0.83        | 0.74        | 0.99        |             |             |
|                    |            | [7,7]       | <b>0.98</b> | <b>0.98</b>            | <b>0.98</b> | <b>0.97</b> | <b>0.99</b> |             |             |
| Precision          | [6,6]      | <b>0.98</b> | <b>0.98</b> | <b>0.98</b>            | <b>0.98</b> | <b>0.99</b> |             |             |             |
|                    | [7,7]      | 0.98        | 0.99        | 0.99                   | 0.98        | 0.99        |             |             |             |
|                    | [7,7]      | <b>0.96</b> | <b>0.86</b> | <b>0.75</b>            | <b>0.60</b> | <b>0.99</b> |             |             |             |
| Recall             | [6,6]      | <b>0.96</b> | <b>0.86</b> | <b>0.75</b>            | <b>0.60</b> | <b>0.99</b> |             |             |             |
|                    | [7,7]      | 0.96        | 0.87        | 0.74                   | 0.63        | 0.99        |             |             |             |
|                    | [7,7]      | <b>0.99</b> | <b>0.99</b> | <b>0.99</b>            | <b>0.99</b> | <b>0.99</b> |             |             |             |
| RDP                | F1-score   | [6,6]       | <b>0.99</b> | <b>0.99</b>            | <b>0.99</b> | <b>0.99</b> | <b>0.99</b> |             |             |
|                    |            | [7,7]       | 0.99        | 0.99                   | 0.99        | 0.99        | 0.99        |             |             |
|                    |            | [7,7]       | <b>0.99</b> | <b>0.99</b>            | <b>0.99</b> | <b>0.99</b> | <b>0.99</b> |             |             |
| Precision          | [6,6]      | <b>0.99</b> | <b>0.99</b> | <b>0.99</b>            | <b>0.99</b> | <b>0.99</b> |             |             |             |
|                    | [7,7]      | 0.99        | 0.99        | 0.99                   | 0.99        | 0.99        |             |             |             |
|                    | [7,7]      | <b>0.99</b> | <b>0.99</b> | <b>0.99</b>            | <b>0.99</b> | <b>0.99</b> |             |             |             |
| Recall             | [6,6]      | <b>0.99</b> | <b>0.99</b> | <b>0.99</b>            | <b>0.99</b> | <b>0.99</b> |             |             |             |
|                    | [7,7]      | 0.99        | 0.99        | 0.99                   | 0.99        | 0.99        |             |             |             |
|                    | [7,7]      | <b>0.98</b> | <b>0.98</b> | <b>0.98</b>            | <b>0.96</b> | <b>0.99</b> |             |             |             |
| SILVA              | F1-score   | [6,6]       | <b>0.99</b> | <b>0.99</b>            | <b>0.99</b> | <b>0.99</b> | <b>0.99</b> |             |             |
|                    |            | [7,7]       | 0.99        | 0.99                   | 0.99        | 0.99        | 0.99        |             |             |
|                    |            | [7,7]       | <b>0.99</b> | <b>0.99</b>            | <b>0.99</b> | <b>0.97</b> | <b>1.00</b> |             |             |
| Precision          | [6,6]      | <b>0.99</b> | <b>0.99</b> | <b>0.99</b>            | <b>0.97</b> | <b>1.00</b> |             |             |             |
|                    | [7,7]      | <b>1.00</b> | <b>1.00</b> | <b>1.00</b>            | <b>1.00</b> | <b>1.00</b> |             |             |             |
|                    | [7,7]      | <b>0.98</b> | <b>0.98</b> | <b>0.98</b>            | <b>0.96</b> | <b>0.98</b> |             |             |             |
| Recall             | [6,6]      | <b>0.98</b> | <b>0.98</b> | <b>0.98</b>            | <b>0.96</b> | <b>0.98</b> |             |             |             |
|                    | [7,7]      | 0.99        | 0.99        | 0.99                   | 0.99        | 0.98        |             |             |             |
|                    | [7,7]      | <b>0.95</b> | <b>0.95</b> | <b>0.95</b>            | <b>0.95</b> | <b>0.97</b> |             |             |             |
| GSR                | F1-score   | [6,6]       | <b>0.95</b> | <b>0.95</b>            | <b>0.95</b> | <b>0.95</b> | <b>0.97</b> |             |             |
|                    |            | [7,7]       | 0.96        | 0.95                   | 0.95        | 0.95        | 0.96        |             |             |

Continued on next page

Supplementary Table 2: N-gram-range and confidence threshold benchmarking at family level. F1-score, precision and recall are shown for each database, evaluated region and validation datasets. The values are the average of the five metagenomic samples. Bold represents the highest value.

| Validation Dataset | Region | Database | Metrics   | Conf. thres.<br>N-gram | 0.5  | 0.7  | 0.9  | 0.98 | disable |
|--------------------|--------|----------|-----------|------------------------|------|------|------|------|---------|
|                    |        |          | Precision | [6,6]                  | 0.99 | 0.99 | 0.99 | 0.99 | 0.99    |
|                    |        |          |           | [7,7]                  | 0.99 | 0.99 | 0.99 | 0.99 | 0.99    |
|                    |        |          | Recall    | [6,6]                  | 0.93 | 0.93 | 0.93 | 0.93 | 0.95    |
|                    |        |          |           | [7,7]                  | 0.95 | 0.94 | 0.93 | 0.93 | 0.95    |
|                    |        |          | F1-score  | [6,6]                  | 0.92 | 0.91 | 0.90 | 0.90 | 0.96    |
|                    |        |          |           | [7,7]                  | 0.93 | 0.92 | 0.90 | 0.90 | 0.95    |
|                    |        |          | Precision | [6,6]                  | 0.97 | 0.96 | 0.95 | 0.96 | 0.97    |
|                    |        |          |           | [7,7]                  | 0.97 | 0.97 | 0.96 | 0.95 | 0.97    |
|                    |        |          | Recall    | [6,6]                  | 0.90 | 0.89 | 0.88 | 0.88 | 0.95    |
|                    |        |          |           | [7,7]                  | 0.91 | 0.90 | 0.88 | 0.88 | 0.94    |
|                    |        |          | F1-score  | [6,6]                  | 0.94 | 0.94 | 0.92 | 0.91 | 0.94    |
|                    |        |          |           | [7,7]                  | 0.94 | 0.94 | 0.93 | 0.92 | 0.94    |
|                    |        |          | Precision | [6,6]                  | 0.98 | 0.98 | 0.95 | 0.93 | 0.98    |
|                    |        |          |           | [7,7]                  | 0.98 | 0.98 | 0.96 | 0.95 | 0.98    |
|                    |        |          | Recall    | [6,6]                  | 0.93 | 0.92 | 0.90 | 0.90 | 0.92    |
|                    |        |          |           | [7,7]                  | 0.92 | 0.92 | 0.91 | 0.90 | 0.92    |
|                    |        |          | F1-score  | [6,6]                  | 0.91 | 0.85 | 0.74 | 0.54 | 0.97    |
|                    |        |          |           | [7,7]                  | 0.93 | 0.85 | 0.74 | 0.56 | 0.96    |
|                    |        |          | Precision | [6,6]                  | 0.95 | 0.94 | 0.90 | 0.65 | 0.99    |
|                    |        |          |           | [7,7]                  | 0.97 | 0.94 | 0.86 | 0.68 | 0.99    |
|                    |        |          | Recall    | [6,6]                  | 0.89 | 0.81 | 0.68 | 0.49 | 0.96    |
|                    |        |          |           | [7,7]                  | 0.91 | 0.81 | 0.69 | 0.51 | 0.95    |
|                    |        |          | F1-score  | [6,6]                  | 0.82 | 0.82 | 0.82 | 0.81 | 0.82    |
|                    |        |          |           | [7,7]                  | 0.85 | 0.84 | 0.82 | 0.82 | 0.84    |
| Precision          | [6,6]  | 0.83     | 0.86      | 0.86                   | 0.85 | 0.83 |      |      |         |
|                    | [7,7]  | 0.87     | 0.90      | 0.86                   | 0.86 | 0.87 |      |      |         |
| Recall             | [6,6]  | 0.81     | 0.81      | 0.81                   | 0.80 | 0.82 |      |      |         |
|                    | [7,7]  | 0.84     | 0.83      | 0.81                   | 0.81 | 0.84 |      |      |         |
| F1-score           | [6,6]  | 0.95     | 0.95      | 0.95                   | 0.93 | 0.95 |      |      |         |
|                    | [7,7]  | 0.95     | 0.95      | 0.95                   | 0.94 | 0.95 |      |      |         |
| Precision          | [6,6]  | 0.99     | 0.99      | 0.99                   | 0.99 | 0.99 |      |      |         |
|                    | [7,7]  | 0.99     | 0.99      | 0.99                   | 0.99 | 0.99 |      |      |         |
| Recall             | [6,6]  | 0.93     | 0.93      | 0.93                   | 0.91 | 0.93 |      |      |         |
|                    | [7,7]  | 0.94     | 0.94      | 0.93                   | 0.92 | 0.94 |      |      |         |
| F1-score           | [6,6]  | 0.99     | 0.99      | 0.99                   | 0.99 | 0.99 |      |      |         |
|                    | [7,7]  | 0.99     | 0.99      | 0.99                   | 0.99 | 0.99 |      |      |         |
| Precision          | [6,6]  | 0.99     | 0.99      | 0.99                   | 0.99 | 0.99 |      |      |         |
|                    | [7,7]  | 0.99     | 0.99      | 0.99                   | 0.99 | 0.99 |      |      |         |
| Recall             | [6,6]  | 0.99     | 0.99      | 0.99                   | 0.99 | 0.99 |      |      |         |
|                    | [7,7]  | 0.99     | 0.99      | 0.99                   | 0.99 | 0.99 |      |      |         |
| F1-score           | [6,6]  | 0.93     | 0.93      | 0.89                   | 0.89 | 0.98 |      |      |         |
|                    | [7,7]  | 0.93     | 0.93      | 0.89                   | 0.89 | 0.98 |      |      |         |
| Precision          | [6,6]  | 0.92     | 0.92      | 0.90                   | 0.90 | 0.98 |      |      |         |
|                    | [7,7]  | 0.92     | 0.92      | 0.90                   | 0.90 | 0.98 |      |      |         |
| Recall             | [6,6]  | 0.94     | 0.94      | 0.89                   | 0.89 | 0.99 |      |      |         |
|                    | [7,7]  | 0.94     | 0.94      | 0.89                   | 0.89 | 0.99 |      |      |         |
| F1-score           | [6,6]  | 0.98     | 0.98      | 0.94                   | 0.94 | 0.99 |      |      |         |
|                    | [7,7]  | 0.98     | 0.98      | 0.94                   | 0.94 | 0.99 |      |      |         |
| Precision          | [6,6]  | 0.98     | 0.98      | 0.94                   | 0.94 | 0.99 |      |      |         |
|                    | [7,7]  | 0.98     | 0.98      | 0.94                   | 0.94 | 0.99 |      |      |         |
| Recall             | [6,6]  | 0.99     | 0.99      | 0.94                   | 0.94 | 0.99 |      |      |         |
|                    | [7,7]  | 0.99     | 0.99      | 0.94                   | 0.94 | 0.99 |      |      |         |
| F1-score           | [6,6]  | 0.98     | 0.86      | 0.64                   | 0.59 | 0.99 |      |      |         |
|                    | [7,7]  | 0.98     | 0.86      | 0.64                   | 0.53 | 0.99 |      |      |         |
| Precision          | [6,6]  | 0.98     | 0.90      | 0.68                   | 0.62 | 0.99 |      |      |         |
|                    | [7,7]  | 0.98     | 0.90      | 0.68                   | 0.57 | 0.99 |      |      |         |
| Recall             | [6,6]  | 0.98     | 0.84      | 0.62                   | 0.56 | 0.99 |      |      |         |
|                    | [7,7]  | 0.98     | 0.84      | 0.62                   | 0.51 | 0.99 |      |      |         |
| F1-score           | [6,6]  | 0.80     | 0.80      | 0.80                   | 0.80 | 0.80 |      |      |         |
|                    | [7,7]  | 0.80     | 0.80      | 0.80                   | 0.80 | 0.80 |      |      |         |
| Precision          | [6,6]  | 0.80     | 0.80      | 0.80                   | 0.80 | 0.80 |      |      |         |

Continued on next page

Supplementary Table 2: N-gram-range and confidence threshold benchmarking at family level. F1-score, precision and recall are shown for each database, evaluated region and validation datasets. The values are the average of the five metagenomic samples. Bold represents the highest value.

| Validation Dataset | Region     | Database  | Metrics | Conf. thres.<br>N-gram | 0.5  | 0.7  | 0.9  | 0.98        | disable |
|--------------------|------------|-----------|---------|------------------------|------|------|------|-------------|---------|
| V3-V5              | SILVA      | Recall    | [6,6]   | [7,7]                  | 0.80 | 0.80 | 0.80 | 0.80        | 0.80    |
|                    |            |           | [6,6]   | [7,7]                  | 0.80 | 0.80 | 0.80 | 0.80        | 0.80    |
|                    |            |           | [6,6]   | [7,7]                  | 0.80 | 0.80 | 0.80 | 0.80        | 0.80    |
|                    |            |           | [6,6]   | [7,7]                  | 0.99 | 0.99 | 0.99 | <b>1.00</b> | 0.99    |
|                    |            |           | [6,6]   | [7,7]                  | 0.99 | 0.99 | 0.99 | 0.99        | 0.99    |
|                    |            |           | [6,6]   | [7,7]                  | 0.99 | 0.99 | 0.99 | <b>1.00</b> | 0.99    |
|                    |            | Precision | [6,6]   | [7,7]                  | 0.99 | 0.99 | 0.99 | 0.99        | 0.99    |
|                    |            |           | [6,6]   | [7,7]                  | 0.99 | 0.99 | 0.99 | <b>1.00</b> | 0.99    |
|                    |            |           | [6,6]   | [7,7]                  | 0.99 | 0.99 | 0.99 | 0.99        | 0.99    |
|                    |            |           | [6,6]   | [7,7]                  | 0.99 | 0.99 | 0.99 | <b>1.00</b> | 0.99    |
|                    |            |           | [6,6]   | [7,7]                  | 0.99 | 0.99 | 0.99 | 0.99        | 0.99    |
|                    |            |           | [6,6]   | [7,7]                  | 0.99 | 0.99 | 0.99 | 0.99        | 0.99    |
|                    | GSR        | F1-score  | [6,6]   | [7,7]                  | 0.97 | 0.97 | 0.96 | 0.96        | 0.98    |
|                    |            |           | [6,6]   | [7,7]                  | 0.97 | 0.97 | 0.96 | 0.96        | 0.98    |
|                    |            |           | [6,6]   | [7,7]                  | 0.99 | 0.99 | 0.99 | 0.98        | 0.99    |
|                    |            | Precision | [6,6]   | [7,7]                  | 0.99 | 0.99 | 0.99 | 0.98        | 0.99    |
|                    |            |           | [6,6]   | [7,7]                  | 0.99 | 0.99 | 0.99 | 0.98        | 0.99    |
|                    |            |           | [6,6]   | [7,7]                  | 0.99 | 0.99 | 0.99 | 0.98        | 0.99    |
|                    | Recall     | [6,6]     | [7,7]   | 0.96                   | 0.96 | 0.95 | 0.94 | 0.97        |         |
|                    |            | [6,6]     | [7,7]   | 0.96                   | 0.96 | 0.95 | 0.94 | 0.98        |         |
|                    |            | [6,6]     | [7,7]   | 0.96                   | 0.96 | 0.95 | 0.94 | 0.98        |         |
|                    |            | [6,6]     | [7,7]   | 0.97                   | 0.97 | 0.96 | 0.96 | 0.98        |         |
|                    |            | [6,6]     | [7,7]   | 0.97                   | 0.97 | 0.96 | 0.96 | 0.98        |         |
|                    |            | [6,6]     | [7,7]   | 0.97                   | 0.97 | 0.96 | 0.96 | 0.98        |         |
|                    | GTDB       | F1-score  | [6,6]   | [7,7]                  | 0.94 | 0.91 | 0.91 | 0.89        | 0.97    |
|                    |            |           | [6,6]   | [7,7]                  | 0.93 | 0.92 | 0.91 | 0.90        | 0.96    |
|                    |            |           | [6,6]   | [7,7]                  | 0.97 | 0.96 | 0.96 | 0.95        | 0.97    |
|                    |            | Precision | [6,6]   | [7,7]                  | 0.97 | 0.96 | 0.95 | 0.95        | 0.97    |
|                    |            |           | [6,6]   | [7,7]                  | 0.97 | 0.96 | 0.95 | 0.95        | 0.97    |
|                    |            |           | [6,6]   | [7,7]                  | 0.93 | 0.90 | 0.90 | 0.88        | 0.97    |
|                    | Recall     | [6,6]     | [7,7]   | 0.92                   | 0.91 | 0.90 | 0.89 | 0.95        |         |
|                    |            | [6,6]     | [7,7]   | 0.92                   | 0.91 | 0.90 | 0.89 | 0.95        |         |
|                    |            | [6,6]     | [7,7]   | 0.92                   | 0.91 | 0.90 | 0.89 | 0.95        |         |
|                    |            | [6,6]     | [7,7]   | 0.96                   | 0.95 | 0.93 | 0.89 | 0.95        |         |
|                    |            | [6,6]     | [7,7]   | 0.96                   | 0.95 | 0.93 | 0.89 | 0.95        |         |
|                    |            | [6,6]     | [7,7]   | 0.96                   | 0.95 | 0.93 | 0.89 | 0.95        |         |
|                    | Greengenes | F1-score  | [6,6]   | [7,7]                  | 0.96 | 0.95 | 0.93 | 0.88        | 0.96    |
|                    |            |           | [6,6]   | [7,7]                  | 0.97 | 0.96 | 0.94 | 0.90        | 0.96    |
|                    |            |           | [6,6]   | [7,7]                  | 0.97 | 0.97 | 0.95 | 0.89        | 0.98    |
|                    |            | Precision | [6,6]   | [7,7]                  | 0.98 | 0.97 | 0.96 | 0.93        | 0.98    |
|                    |            |           | [6,6]   | [7,7]                  | 0.98 | 0.97 | 0.96 | 0.93        | 0.98    |
|                    |            |           | [6,6]   | [7,7]                  | 0.95 | 0.93 | 0.92 | 0.87        | 0.94    |
|                    | Recall     | [6,6]     | [7,7]   | 0.96                   | 0.95 | 0.93 | 0.89 | 0.95        |         |
|                    |            | [6,6]     | [7,7]   | 0.96                   | 0.95 | 0.93 | 0.89 | 0.95        |         |
|                    |            | [6,6]     | [7,7]   | 0.96                   | 0.95 | 0.93 | 0.89 | 0.95        |         |
|                    |            | [6,6]     | [7,7]   | 0.93                   | 0.82 | 0.58 | 0.48 | 0.98        |         |
|                    |            | [6,6]     | [7,7]   | 0.93                   | 0.80 | 0.59 | 0.48 | 0.99        |         |
|                    |            | [6,6]     | [7,7]   | 0.93                   | 0.80 | 0.59 | 0.48 | 0.99        |         |
| ITGDB              | Precision  | [6,6]     | [7,7]   | 0.96                   | 0.90 | 0.66 | 0.54 | 0.99        |         |
|                    |            | [6,6]     | [7,7]   | 0.96                   | 0.88 | 0.66 | 0.55 | 0.99        |         |
|                    |            | [6,6]     | [7,7]   | 0.96                   | 0.88 | 0.66 | 0.55 | 0.99        |         |
|                    | Recall     | [6,6]     | [7,7]   | 0.92                   | 0.77 | 0.55 | 0.45 | 0.97        |         |
|                    |            | [6,6]     | [7,7]   | 0.91                   | 0.76 | 0.55 | 0.46 | 0.99        |         |
|                    |            | [6,6]     | [7,7]   | 0.91                   | 0.76 | 0.55 | 0.46 | 0.99        |         |
| RDP                | F1-score   | [6,6]     | [7,7]   | 0.85                   | 0.85 | 0.85 | 0.85 | 0.87        |         |
|                    |            | [6,6]     | [7,7]   | 0.86                   | 0.85 | 0.85 | 0.85 | 0.88        |         |
|                    |            | [6,6]     | [7,7]   | 0.87                   | 0.87 | 0.87 | 0.87 | 0.94        |         |
|                    | Precision  | [6,6]     | [7,7]   | 0.87                   | 0.87 | 0.87 | 0.87 | 0.95        |         |
|                    |            | [6,6]     | [7,7]   | 0.87                   | 0.87 | 0.87 | 0.87 | 0.95        |         |
|                    |            | [6,6]     | [7,7]   | 0.87                   | 0.87 | 0.87 | 0.87 | 0.95        |         |
| Recall             | [6,6]      | [7,7]     | 0.84    | 0.84                   | 0.83 | 0.83 | 0.86 |             |         |
|                    | [6,6]      | [7,7]     | 0.85    | 0.84                   | 0.84 | 0.83 | 0.87 |             |         |
|                    | [6,6]      | [7,7]     | 0.85    | 0.84                   | 0.84 | 0.83 | 0.87 |             |         |
|                    | [6,6]      | [7,7]     | 0.97    | 0.96                   | 0.96 | 0.96 | 0.97 |             |         |
|                    | [6,6]      | [7,7]     | 0.98    | 0.97                   | 0.96 | 0.96 | 0.98 |             |         |
|                    | [6,6]      | [7,7]     | 0.98    | 0.97                   | 0.96 | 0.96 | 0.98 |             |         |
| SILVA              | Precision  | [6,6]     | [7,7]   | 0.99                   | 0.99 | 0.99 | 0.99 | 0.99        |         |
|                    |            | [6,6]     | [7,7]   | 0.99                   | 0.99 | 0.99 | 0.99 | 0.99        |         |
|                    |            | [6,6]     | [7,7]   | 0.99                   | 0.99 | 0.99 | 0.99 | 0.99        |         |
|                    | Recall     | [6,6]     | [7,7]   | 0.95                   | 0.95 | 0.95 | 0.95 | 0.95        |         |
|                    |            | [6,6]     | [7,7]   | 0.95                   | 0.95 | 0.95 | 0.95 | 0.95        |         |
|                    |            | [6,6]     | [7,7]   | 0.98                   | 0.96 | 0.95 | 0.95 | 0.97        |         |
| GSR                | F1-score   | [6,6]     | [7,7]   | 0.99                   | 0.99 | 0.99 | 0.98 | 0.99        |         |
|                    |            | [6,6]     | [7,7]   | 0.99                   | 0.99 | 0.99 | 0.98 | 0.99        |         |
|                    |            | [6,6]     | [7,7]   | 0.99                   | 0.99 | 0.99 | 0.98 | 0.99        |         |
|                    | Precision  | [6,6]     | [7,7]   | 0.99                   | 0.99 | 0.99 | 0.98 | 0.99        |         |
|                    |            | [6,6]     | [7,7]   | 0.99                   | 0.99 | 0.99 | 0.98 | 0.99        |         |
|                    |            | [6,6]     | [7,7]   | 0.99                   | 0.99 | 0.99 | 0.98 | 0.99        |         |
| Recall             | [6,6]      | [7,7]     | 0.99    | 0.99                   | 0.99 | 0.98 | 0.99 |             |         |
|                    | [6,6]      | [7,7]     | 0.99    | 0.99                   | 0.99 | 0.98 | 0.99 |             |         |
|                    | [6,6]      | [7,7]     | 0.99    | 0.99                   | 0.99 | 0.98 | 0.99 |             |         |
|                    | [6,6]      | [7,7]     | 0.99    | 0.99                   | 0.99 | 0.98 | 0.99 |             |         |
|                    | [6,6]      | [7,7]     | 0.99    | 0.99                   | 0.99 | 0.98 | 0.99 |             |         |
|                    | [6,6]      | [7,7]     | 0.99    | 0.99                   | 0.99 | 0.98 | 0.99 |             |         |
| GTDB               | F1-score   | [6,6]     | [7,7]   | 0.88                   | 0.87 | 0.83 | 0.75 | 0.90        |         |
|                    |            | [6,6]     | [7,7]   | 0.88                   | 0.87 | 0.83 | 0.73 | 0.90        |         |
|                    |            | [6,6]     | [7,7]   | 0.90                   | 0.89 | 0.84 | 0.79 | 0.92        |         |
|                    | Precision  | [6,6]     | [7,7]   | 0.90                   | 0.89 | 0.84 | 0.79 | 0.92        |         |
|                    |            | [6,6]     | [7,7]   | 0.90                   | 0.89 | 0.84 | 0.79 | 0.92        |         |
|                    |            | [6,6]     | [7,7]   | 0.87                   | 0.86 | 0.83 | 0.74 | 0.90        |         |
| Recall             | [6,6]      | [7,7]     | 0.87    | 0.86                   | 0.83 | 0.72 | 0.90 |             |         |
|                    | [6,6]      | [7,7]     | 0.87    | 0.86                   | 0.83 | 0.72 | 0.90 |             |         |
|                    | [6,6]      | [7,7]     | 0.87    | 0.86                   | 0.83 | 0.72 | 0.90 |             |         |
|                    | [6,6]      | [7,7]     | 0.96    | 0.94                   | 0.89 | 0.86 | 0.98 |             |         |
|                    | [6,6]      | [7,7]     | 0.96    | 0.94                   | 0.89 | 0.86 | 0.98 |             |         |
|                    | [6,6]      | [7,7]     | 0.96    | 0.94                   | 0.89 | 0.86 | 0.98 |             |         |
| Greengenes         | Precision  | [6,6]     | [7,7]   | 0.96                   | 0.93 | 0.88 | 0.86 | 0.98        |         |
|                    |            | [6,6]     | [7,7]   | 0.96                   | 0.93 | 0.88 | 0.86 | 0.98        |         |

Continued on next page

Supplementary Table 2: N-gram-range and confidence threshold benchmarking at family level. F1-score, precision and recall are shown for each database, evaluated region and validation datasets. The values are the average of the five metagenomic samples. Bold represents the highest value.

| Validation Dataset | Region     | Database    | Metrics     | Conf. thres.<br>N-gram | <b>0.5</b>  | <b>0.7</b>  | <b>0.9</b>  | <b>0.98</b> | <b>disable</b> |
|--------------------|------------|-------------|-------------|------------------------|-------------|-------------|-------------|-------------|----------------|
| full-16S           | ITGDB      | Recall      | [6,6]       | 0.97                   | 0.96        | 0.90        | 0.88        | 0.98        |                |
|                    |            |             | [7,7]       | 0.97                   | 0.96        | 0.90        | 0.88        | 0.98        |                |
|                    |            | F1-score    | [6,6]       | 0.99                   | 0.83        | 0.55        | 0.39        | 0.99        |                |
|                    |            |             | [7,7]       | 0.99                   | 0.83        | 0.55        | 0.39        | 0.99        |                |
|                    |            | Precision   | [6,6]       | 0.99                   | 0.85        | 0.60        | 0.39        | 0.99        |                |
|                    |            |             | [7,7]       | 0.99                   | 0.83        | 0.60        | 0.39        | 0.99        |                |
|                    |            | Recall      | [6,6]       | 0.99                   | 0.82        | 0.53        | 0.39        | 0.99        |                |
|                    |            |             | [7,7]       | 0.99                   | 0.83        | 0.53        | 0.39        | 0.99        |                |
|                    |            | RDP         | F1-score    | [6,6]                  | 0.84        | 0.84        | 0.84        | 0.80        | 0.84           |
|                    |            |             |             | [7,7]                  | 0.84        | 0.84        | 0.84        | 0.84        | 0.84           |
|                    |            |             | Precision   | [6,6]                  | 0.84        | 0.84        | 0.84        | 0.80        | 0.84           |
|                    |            |             |             | [7,7]                  | 0.84        | 0.84        | 0.84        | 0.84        | 0.84           |
|                    | Recall     | [6,6]       | 0.84        | 0.84                   | 0.84        | 0.80        | 0.84        |             |                |
|                    |            | [7,7]       | 0.84        | 0.84                   | 0.84        | 0.84        | 0.84        |             |                |
|                    | SILVA      | F1-score    | [6,6]       | <b>1.00</b>            | <b>1.00</b> | <b>1.00</b> | 0.95        | 0.99        |                |
|                    |            |             | [7,7]       | <b>1.00</b>            | <b>1.00</b> | <b>1.00</b> | 0.95        | 0.99        |                |
|                    |            | Precision   | [6,6]       | <b>1.00</b>            | <b>1.00</b> | <b>1.00</b> | 0.95        | 0.99        |                |
|                    |            |             | [7,7]       | <b>1.00</b>            | <b>1.00</b> | <b>1.00</b> | 0.95        | 0.99        |                |
|                    | Recall     | [6,6]       | <b>1.00</b> | <b>1.00</b>            | <b>1.00</b> | 0.95        | 0.99        |             |                |
|                    |            | [7,7]       | <b>1.00</b> | <b>1.00</b>            | <b>1.00</b> | 0.95        | 0.99        |             |                |
|                    | GSR        | F1-score    | [6,6]       | 0.97                   | 0.97        | 0.97        | 0.97        | 0.97        |                |
|                    |            |             | [7,7]       | 0.97                   | 0.97        | 0.97        | 0.97        | 0.98        |                |
|                    |            | Precision   | [6,6]       | 0.99                   | 0.99        | 0.99        | 0.99        | 0.99        |                |
|                    |            |             | [7,7]       | 0.99                   | 0.99        | 0.99        | 0.99        | 0.99        |                |
|                    |            | Recall      | [6,6]       | 0.95                   | 0.95        | 0.95        | 0.95        | 0.96        |                |
|                    |            |             | [7,7]       | 0.96                   | 0.96        | 0.95        | 0.95        | 0.98        |                |
|                    |            | GTDB        | F1-score    | [6,6]                  | 0.93        | 0.92        | 0.90        | 0.86        | 0.96           |
|                    |            |             |             | [7,7]                  | 0.93        | 0.93        | 0.92        | 0.90        | 0.96           |
|                    |            |             | Precision   | [6,6]                  | 0.96        | 0.93        | 0.92        | 0.86        | 0.97           |
|                    |            |             |             | [7,7]                  | 0.93        | 0.93        | 0.93        | 0.92        | 0.96           |
|                    |            | Recall      | [6,6]       | 0.93                   | 0.91        | 0.90        | 0.87        | 0.96        |                |
|                    |            |             | [7,7]       | 0.94                   | 0.93        | 0.91        | 0.90        | 0.97        |                |
|                    | Greengenes | F1-score    | [6,6]       | 0.96                   | 0.96        | 0.95        | 0.91        | 0.96        |                |
|                    |            |             | [7,7]       | 0.96                   | 0.96        | 0.96        | 0.95        | 0.96        |                |
|                    |            | Precision   | [6,6]       | 0.98                   | 0.98        | 0.97        | 0.92        | 0.98        |                |
|                    |            |             | [7,7]       | 0.98                   | 0.98        | 0.98        | 0.97        | 0.98        |                |
| Recall             | [6,6]      | 0.94        | 0.94        | 0.94                   | 0.91        | 0.94        |             |             |                |
|                    | [7,7]      | 0.94        | 0.94        | 0.94                   | 0.93        | 0.94        |             |             |                |
| ITGDB              | F1-score   | [6,6]       | 0.97        | 0.89                   | 0.69        | 0.51        | 0.98        |             |                |
|                    |            | [7,7]       | 0.97        | 0.91                   | 0.74        | 0.59        | <b>1.00</b> |             |                |
|                    | Precision  | [6,6]       | 0.99        | 0.96                   | 0.79        | 0.64        | <b>1.00</b> |             |                |
|                    |            | [7,7]       | 0.99        | 0.97                   | 0.90        | 0.69        | <b>1.00</b> |             |                |
|                    | Recall     | [6,6]       | 0.95        | 0.85                   | 0.65        | 0.47        | 0.97        |             |                |
|                    |            | [7,7]       | 0.96        | 0.87                   | 0.68        | 0.55        | 0.99        |             |                |
|                    | RDP        | F1-score    | [6,6]       | 0.85                   | 0.85        | 0.85        | 0.85        | 0.85        |                |
|                    |            |             | [7,7]       | 0.86                   | 0.85        | 0.85        | 0.85        | 0.86        |                |
| Precision          |            | [6,6]       | 0.88        | 0.87                   | 0.88        | 0.88        | 0.88        |             |                |
|                    |            | [7,7]       | 0.88        | 0.88                   | 0.88        | 0.87        | 0.87        |             |                |
| Recall             | [6,6]      | 0.84        | 0.84        | 0.84                   | 0.84        | 0.84        |             |             |                |
|                    | [7,7]      | 0.85        | 0.84        | 0.84                   | 0.84        | 0.86        |             |             |                |
| SILVA              | F1-score   | [6,6]       | 0.97        | 0.97                   | 0.96        | 0.96        | 0.97        |             |                |
|                    |            | [7,7]       | 0.97        | 0.97                   | 0.97        | 0.97        | 0.97        |             |                |
|                    | Precision  | [6,6]       | 0.99        | 0.99                   | 0.99        | 0.98        | 0.99        |             |                |
|                    |            | [7,7]       | 0.99        | 0.99                   | 0.99        | 0.99        | 0.99        |             |                |
| Recall             | [6,6]      | 0.95        | 0.95        | 0.95                   | 0.95        | 0.95        |             |             |                |
|                    | [7,7]      | 0.96        | 0.96        | 0.96                   | 0.95        | 0.96        |             |             |                |
| GSR                | F1-score   | [6,6]       | <b>1.00</b> | <b>1.00</b>            | <b>1.00</b> | <b>1.00</b> | <b>1.00</b> |             |                |
|                    |            | [7,7]       | <b>1.00</b> | <b>1.00</b>            | <b>1.00</b> | <b>1.00</b> | <b>1.00</b> |             |                |
|                    | Precision  | [6,6]       | <b>1.00</b> | <b>1.00</b>            | <b>1.00</b> | <b>1.00</b> | <b>1.00</b> |             |                |
|                    |            | [7,7]       | <b>1.00</b> | <b>1.00</b>            | <b>1.00</b> | <b>1.00</b> | <b>1.00</b> |             |                |
| Recall             | [6,6]      | <b>1.00</b> | <b>1.00</b> | <b>1.00</b>            | <b>1.00</b> | <b>1.00</b> |             |             |                |
|                    | [7,7]      | <b>1.00</b> | <b>1.00</b> | <b>1.00</b>            | <b>1.00</b> | <b>1.00</b> |             |             |                |

Continued on next page

Supplementary Table 2: N-gram-range and confidence threshold benchmarking at family level. F1-score, precision and recall are shown for each database, evaluated region and validation datasets. The values are the average of the five metagenomic samples. Bold represents the highest value.

| Validation Dataset | Region     | Database    | Metrics     | Conf. thres.<br>N-gram | 0.5         | 0.7         | 0.9         | 0.98        | disable     |
|--------------------|------------|-------------|-------------|------------------------|-------------|-------------|-------------|-------------|-------------|
|                    | V3-V4      | GTDB        | F1-score    | [7,7]                  | <b>1.00</b> | <b>1.00</b> | <b>1.00</b> | <b>1.00</b> | <b>1.00</b> |
|                    |            |             |             | [6,6]                  | <b>1.00</b> | <b>1.00</b> | <b>1.00</b> | <b>1.00</b> | <b>1.00</b> |
|                    |            |             | [7,7]       | <b>1.00</b>            | <b>1.00</b> | <b>1.00</b> | <b>1.00</b> | <b>1.00</b> |             |
|                    |            |             | [6,6]       | <b>1.00</b>            | <b>1.00</b> | <b>1.00</b> | <b>1.00</b> | <b>1.00</b> |             |
|                    |            | Precision   | [7,7]       | <b>1.00</b>            | <b>1.00</b> | <b>1.00</b> | <b>1.00</b> | <b>1.00</b> | <b>1.00</b> |
|                    |            |             | [6,6]       | <b>1.00</b>            | <b>1.00</b> | <b>1.00</b> | <b>1.00</b> | <b>1.00</b> |             |
|                    |            |             | [7,7]       | <b>1.00</b>            | <b>1.00</b> | <b>1.00</b> | <b>1.00</b> | <b>1.00</b> |             |
|                    |            |             | [6,6]       | <b>1.00</b>            | <b>1.00</b> | <b>1.00</b> | <b>1.00</b> | <b>1.00</b> |             |
|                    |            | Recall      | [7,7]       | <b>1.00</b>            | <b>1.00</b> | <b>1.00</b> | <b>1.00</b> | <b>1.00</b> | <b>1.00</b> |
|                    |            |             | [6,6]       | <b>1.00</b>            | <b>1.00</b> | <b>1.00</b> | <b>1.00</b> | <b>1.00</b> |             |
|                    |            |             | [7,7]       | <b>1.00</b>            | <b>1.00</b> | <b>1.00</b> | <b>1.00</b> | <b>1.00</b> |             |
|                    |            |             | [6,6]       | <b>1.00</b>            | <b>1.00</b> | <b>1.00</b> | <b>1.00</b> | <b>1.00</b> |             |
|                    | Greengenes | F1-score    | [6,6]       | <b>1.00</b>            | <b>1.00</b> | <b>1.00</b> | <b>1.00</b> | <b>1.00</b> | <b>1.00</b> |
|                    |            |             | [7,7]       | <b>1.00</b>            | <b>1.00</b> | <b>1.00</b> | <b>1.00</b> | <b>1.00</b> |             |
|                    |            | Precision   | [6,6]       | <b>1.00</b>            | <b>1.00</b> | <b>1.00</b> | <b>1.00</b> | <b>1.00</b> |             |
|                    |            |             | [7,7]       | <b>1.00</b>            | <b>1.00</b> | <b>1.00</b> | <b>1.00</b> | <b>1.00</b> |             |
|                    | Recall     | [6,6]       | <b>1.00</b> | <b>1.00</b>            | <b>1.00</b> | <b>1.00</b> | <b>1.00</b> |             |             |
|                    |            | [7,7]       | <b>1.00</b> | <b>1.00</b>            | <b>1.00</b> | <b>1.00</b> | <b>1.00</b> |             |             |
|                    | ITGDB      | F1-score    | [6,6]       | <b>1.00</b>            | 0.99        | 0.98        | 0.98        | <b>1.00</b> |             |
|                    |            |             | [7,7]       | <b>1.00</b>            | <b>1.00</b> | 0.98        | 0.98        | <b>1.00</b> |             |
|                    |            | Precision   | [6,6]       | <b>1.00</b>            | <b>1.00</b> | <b>1.00</b> | <b>1.00</b> | <b>1.00</b> |             |
|                    |            |             | [7,7]       | <b>1.00</b>            | <b>1.00</b> | <b>1.00</b> | <b>1.00</b> | <b>1.00</b> |             |
|                    | Recall     | [6,6]       | <b>1.00</b> | 0.98                   | 0.98        | 0.98        | <b>1.00</b> |             |             |
|                    |            | [7,7]       | <b>1.00</b> | <b>1.00</b>            | 0.98        | 0.98        | <b>1.00</b> |             |             |
| RDP                | F1-score   | [6,6]       | 0.99        | 0.99                   | 0.99        | 0.99        | 0.99        |             |             |
|                    |            | [7,7]       | 0.99        | 0.99                   | 0.99        | 0.99        | 0.99        |             |             |
|                    | Precision  | [6,6]       | 0.99        | 0.99                   | 0.99        | 0.99        | 0.99        |             |             |
|                    |            | [7,7]       | 0.99        | 0.99                   | 0.99        | 0.99        | 0.99        |             |             |
| Recall             | [6,6]      | 0.99        | 0.99        | 0.99                   | 0.99        | 0.99        |             |             |             |
|                    | [7,7]      | 0.99        | 0.99        | 0.99                   | 0.99        | 0.99        |             |             |             |
| SILVA              | F1-score   | [6,6]       | <b>1.00</b> | <b>1.00</b>            | <b>1.00</b> | <b>1.00</b> | <b>1.00</b> |             |             |
|                    |            | [7,7]       | <b>1.00</b> | <b>1.00</b>            | <b>1.00</b> | <b>1.00</b> | <b>1.00</b> |             |             |
|                    | Precision  | [6,6]       | <b>1.00</b> | <b>1.00</b>            | <b>1.00</b> | <b>1.00</b> | <b>1.00</b> |             |             |
|                    |            | [7,7]       | <b>1.00</b> | <b>1.00</b>            | <b>1.00</b> | <b>1.00</b> | <b>1.00</b> |             |             |
| Recall             | [6,6]      | <b>1.00</b> | <b>1.00</b> | <b>1.00</b>            | <b>1.00</b> | <b>1.00</b> |             |             |             |
|                    | [7,7]      | <b>1.00</b> | <b>1.00</b> | <b>1.00</b>            | <b>1.00</b> | <b>1.00</b> |             |             |             |
| V3-V4              | GSR        | F1-score    | [6,6]       | <b>1.00</b>            | <b>1.00</b> | <b>1.00</b> | <b>1.00</b> | <b>1.00</b> |             |
|                    |            |             | [7,7]       | <b>1.00</b>            | <b>1.00</b> | <b>1.00</b> | <b>1.00</b> |             |             |
|                    |            | Precision   | [6,6]       | <b>1.00</b>            | <b>1.00</b> | <b>1.00</b> | <b>1.00</b> | <b>1.00</b> |             |
|                    |            |             | [7,7]       | <b>1.00</b>            | <b>1.00</b> | <b>1.00</b> | <b>1.00</b> |             |             |
|                    | Recall     | [6,6]       | <b>1.00</b> | <b>1.00</b>            | <b>1.00</b> | <b>1.00</b> | <b>1.00</b> |             |             |
|                    |            | [7,7]       | <b>1.00</b> | <b>1.00</b>            | <b>1.00</b> | <b>1.00</b> |             |             |             |
|                    | GTDB       | F1-score    | [6,6]       | <b>1.00</b>            | <b>1.00</b> | 0.97        | 0.93        | <b>1.00</b> |             |
|                    |            |             | [7,7]       | <b>1.00</b>            | <b>1.00</b> | <b>1.00</b> | <b>1.00</b> |             |             |
|                    |            | Precision   | [6,6]       | <b>1.00</b>            | <b>1.00</b> | <b>1.00</b> | <b>1.00</b> | <b>1.00</b> |             |
|                    |            |             | [7,7]       | <b>1.00</b>            | <b>1.00</b> | <b>1.00</b> | <b>1.00</b> |             |             |
|                    | Recall     | [6,6]       | <b>1.00</b> | <b>1.00</b>            | 0.94        | 0.88        | <b>1.00</b> |             |             |
|                    |            | [7,7]       | <b>1.00</b> | <b>1.00</b>            | <b>1.00</b> | <b>1.00</b> |             |             |             |
| Greengenes         | F1-score   | [6,6]       | <b>1.00</b> | <b>1.00</b>            | <b>1.00</b> | <b>1.00</b> | <b>1.00</b> |             |             |
|                    |            | [7,7]       | <b>1.00</b> | <b>1.00</b>            | <b>1.00</b> | <b>1.00</b> |             |             |             |
|                    | Precision  | [6,6]       | <b>1.00</b> | <b>1.00</b>            | <b>1.00</b> | <b>1.00</b> | <b>1.00</b> |             |             |
|                    |            | [7,7]       | <b>1.00</b> | <b>1.00</b>            | <b>1.00</b> | <b>1.00</b> |             |             |             |
| Recall             | [6,6]      | <b>1.00</b> | <b>1.00</b> | <b>1.00</b>            | <b>1.00</b> | <b>1.00</b> |             |             |             |
|                    | [7,7]      | <b>1.00</b> | <b>1.00</b> | <b>1.00</b>            | <b>1.00</b> |             |             |             |             |
| ITGDB              | F1-score   | [6,6]       | 0.99        | 0.99                   | 0.99        | 0.98        | <b>1.00</b> |             |             |
|                    |            | [7,7]       | 0.99        | 0.99                   | 0.99        | 0.99        | <b>1.00</b> |             |             |
|                    | Precision  | [6,6]       | <b>1.00</b> | <b>1.00</b>            | 0.99        | 0.99        | <b>1.00</b> |             |             |
|                    |            | [7,7]       | <b>1.00</b> | <b>1.00</b>            | 0.99        | 0.99        | <b>1.00</b> |             |             |
| Recall             | [6,6]      | 0.99        | 0.99        | 0.99                   | 0.97        | <b>1.00</b> |             |             |             |
|                    | [7,7]      | 0.99        | 0.99        | 0.99                   | 0.99        | <b>1.00</b> |             |             |             |
| RDP                | F1-score   | [6,6]       | <b>1.00</b> | <b>1.00</b>            | <b>1.00</b> | <b>1.00</b> | <b>1.00</b> |             |             |
|                    |            | [7,7]       | <b>1.00</b> | <b>1.00</b>            | <b>1.00</b> | <b>1.00</b> |             |             |             |
|                    | Precision  | [6,6]       | <b>1.00</b> | <b>1.00</b>            | <b>1.00</b> | <b>1.00</b> | <b>1.00</b> |             |             |
|                    |            | [7,7]       | <b>1.00</b> | <b>1.00</b>            | <b>1.00</b> | <b>1.00</b> |             |             |             |
| Recall             | [6,6]      | <b>1.00</b> | <b>1.00</b> | <b>1.00</b>            | <b>1.00</b> | <b>1.00</b> |             |             |             |
|                    | [7,7]      | <b>1.00</b> | <b>1.00</b> | <b>1.00</b>            | <b>1.00</b> |             |             |             |             |

Continued on next page

Supplementary Table 2: N-gram-range and confidence threshold benchmarking at family level. F1-score, precision and recall are shown for each database, evaluated region and validation datasets. The values are the average of the five metagenomic samples. Bold represents the highest value.

| Validation Dataset | Region      | Database    | Metrics     | Conf. thres.<br>N-gram | 0.5         | 0.7         | 0.9         | 0.98        | disable     |             |
|--------------------|-------------|-------------|-------------|------------------------|-------------|-------------|-------------|-------------|-------------|-------------|
| V3-V5              | V3          | SILVA       | F1-score    | [6,6]                  | <b>1.00</b> | 0.99        | 0.99        | 0.99        | <b>1.00</b> |             |
|                    |             |             |             | [7,7]                  | <b>1.00</b> | <b>1.00</b> | 0.99        | 0.99        | <b>1.00</b> |             |
|                    |             |             | Precision   | [6,6]                  | <b>1.00</b> | 0.99        | 0.99        | 0.99        | <b>1.00</b> |             |
|                    |             |             |             | [7,7]                  | <b>1.00</b> | <b>1.00</b> | 0.99        | 0.99        | <b>1.00</b> |             |
|                    |             | Recall      | [6,6]       | <b>1.00</b>            | 0.99        | 0.99        | 0.99        | <b>1.00</b> |             |             |
|                    |             |             | [7,7]       | <b>1.00</b>            | <b>1.00</b> | 0.99        | 0.99        | <b>1.00</b> |             |             |
|                    |             | GSR         | F1-score    | [6,6]                  | <b>1.00</b> | <b>1.00</b> | <b>1.00</b> | <b>1.00</b> | <b>1.00</b> |             |
|                    |             |             |             | [7,7]                  | <b>1.00</b> | <b>1.00</b> | <b>1.00</b> | <b>1.00</b> | <b>1.00</b> |             |
|                    |             |             | Precision   | [6,6]                  | <b>1.00</b> | <b>1.00</b> | <b>1.00</b> | <b>1.00</b> | <b>1.00</b> |             |
|                    |             |             |             | [7,7]                  | <b>1.00</b> | <b>1.00</b> | <b>1.00</b> | <b>1.00</b> | <b>1.00</b> |             |
|                    |             | Recall      | [6,6]       | <b>1.00</b>            | <b>1.00</b> | <b>1.00</b> | <b>1.00</b> | <b>1.00</b> |             |             |
|                    |             |             | [7,7]       | <b>1.00</b>            | <b>1.00</b> | <b>1.00</b> | <b>1.00</b> | <b>1.00</b> |             |             |
|                    | GTDB        | F1-score    | [6,6]       | <b>1.00</b>            | <b>1.00</b> | <b>1.00</b> | <b>1.00</b> | 0.97        | <b>1.00</b> |             |
|                    |             |             | [7,7]       | <b>1.00</b>            | <b>1.00</b> | <b>1.00</b> | <b>1.00</b> | <b>1.00</b> |             |             |
|                    |             | Precision   | [6,6]       | <b>1.00</b>            | <b>1.00</b> | <b>1.00</b> | <b>1.00</b> | <b>1.00</b> |             |             |
|                    |             |             | [7,7]       | <b>1.00</b>            | <b>1.00</b> | <b>1.00</b> | <b>1.00</b> | <b>1.00</b> |             |             |
|                    | Recall      | [6,6]       | <b>1.00</b> | <b>1.00</b>            | <b>1.00</b> | 0.95        | <b>1.00</b> |             |             |             |
|                    |             | [7,7]       | <b>1.00</b> | <b>1.00</b>            | <b>1.00</b> | <b>1.00</b> | <b>1.00</b> |             |             |             |
|                    | V4          | V3          | Greengenes  | F1-score               | [6,6]       | <b>1.00</b> | <b>1.00</b> | <b>1.00</b> | <b>1.00</b> | <b>1.00</b> |
|                    |             |             |             |                        | [7,7]       | <b>1.00</b> | <b>1.00</b> | <b>1.00</b> | <b>1.00</b> | <b>1.00</b> |
|                    |             |             |             | Precision              | [6,6]       | <b>1.00</b> | <b>1.00</b> | <b>1.00</b> | <b>1.00</b> | <b>1.00</b> |
|                    |             |             | [7,7]       |                        | <b>1.00</b> | <b>1.00</b> | <b>1.00</b> | <b>1.00</b> | <b>1.00</b> |             |
|                    |             |             | Recall      | [6,6]                  | <b>1.00</b> | <b>1.00</b> | <b>1.00</b> | <b>1.00</b> | <b>1.00</b> |             |
|                    |             |             |             | [7,7]                  | <b>1.00</b> | <b>1.00</b> | <b>1.00</b> | <b>1.00</b> | <b>1.00</b> |             |
| ITGDB              |             | F1-score    | [6,6]       | 0.99                   | 0.99        | 0.97        | 0.97        | <b>1.00</b> |             |             |
|                    |             |             | [7,7]       | 0.99                   | 0.99        | 0.97        | 0.97        | <b>1.00</b> |             |             |
|                    |             | Precision   | [6,6]       | <b>1.00</b>            | <b>1.00</b> | <b>1.00</b> | <b>1.00</b> | <b>1.00</b> |             |             |
| [7,7]              |             |             | <b>1.00</b> | <b>1.00</b>            | <b>1.00</b> | <b>1.00</b> | <b>1.00</b> |             |             |             |
| Recall             |             | [6,6]       | 0.99        | 0.98                   | 0.96        | 0.96        | <b>1.00</b> |             |             |             |
|                    |             | [7,7]       | 0.99        | 0.99                   | 0.96        | 0.96        | <b>1.00</b> |             |             |             |
| V4                 | RDP         | F1-score    | [6,6]       | <b>1.00</b>            | <b>1.00</b> | <b>1.00</b> | <b>1.00</b> | <b>1.00</b> |             |             |
|                    |             |             | [7,7]       | <b>1.00</b>            | <b>1.00</b> | <b>1.00</b> | <b>1.00</b> | <b>1.00</b> |             |             |
|                    |             | Precision   | [6,6]       | <b>1.00</b>            | <b>1.00</b> | <b>1.00</b> | <b>1.00</b> | <b>1.00</b> |             |             |
| [7,7]              | <b>1.00</b> |             | <b>1.00</b> | <b>1.00</b>            | <b>1.00</b> | <b>1.00</b> |             |             |             |             |
| Recall             | [6,6]       | <b>1.00</b> | <b>1.00</b> | <b>1.00</b>            | <b>1.00</b> | <b>1.00</b> |             |             |             |             |
|                    | [7,7]       | <b>1.00</b> | <b>1.00</b> | <b>1.00</b>            | <b>1.00</b> | <b>1.00</b> |             |             |             |             |
| V5                 | SILVA       | F1-score    | [6,6]       | <b>1.00</b>            | <b>1.00</b> | 0.99        | 0.99        | <b>1.00</b> |             |             |
|                    |             |             | [7,7]       | <b>1.00</b>            | <b>1.00</b> | <b>1.00</b> | 0.99        | <b>1.00</b> |             |             |
|                    |             | Precision   | [6,6]       | <b>1.00</b>            | <b>1.00</b> | 0.99        | 0.99        | <b>1.00</b> |             |             |
|                    | [7,7]       |             | <b>1.00</b> | <b>1.00</b>            | <b>1.00</b> | 0.99        | <b>1.00</b> |             |             |             |
|                    | Recall      | [6,6]       | <b>1.00</b> | 0.99                   | 0.99        | 0.99        | <b>1.00</b> |             |             |             |
|                    |             | [7,7]       | <b>1.00</b> | <b>1.00</b>            | 0.99        | 0.99        | <b>1.00</b> |             |             |             |
| V5                 | GSR         | F1-score    | [6,6]       | <b>1.00</b>            | <b>1.00</b> | <b>1.00</b> | 0.99        | <b>1.00</b> |             |             |
|                    |             |             | [7,7]       | <b>1.00</b>            | <b>1.00</b> | <b>1.00</b> | 0.99        | <b>1.00</b> |             |             |
|                    |             | Precision   | [6,6]       | <b>1.00</b>            | <b>1.00</b> | <b>1.00</b> | <b>1.00</b> | <b>1.00</b> |             |             |
|                    | [7,7]       |             | <b>1.00</b> | <b>1.00</b>            | <b>1.00</b> | <b>1.00</b> | <b>1.00</b> |             |             |             |
|                    | Recall      | [6,6]       | <b>1.00</b> | <b>1.00</b>            | <b>1.00</b> | 0.99        | <b>1.00</b> |             |             |             |
|                    |             | [7,7]       | <b>1.00</b> | <b>1.00</b>            | <b>1.00</b> | 0.99        | <b>1.00</b> |             |             |             |
| V5                 | GTDB        | F1-score    | [6,6]       | 0.94                   | 0.94        | 0.91        | 0.91        | 0.94        |             |             |
|                    |             |             | [7,7]       | <b>1.00</b>            | <b>1.00</b> | 0.94        | 0.91        | <b>1.00</b> |             |             |
|                    |             | Precision   | [6,6]       | <b>1.00</b>            | <b>1.00</b> | <b>1.00</b> | <b>1.00</b> | <b>1.00</b> |             |             |
|                    | [7,7]       |             | <b>1.00</b> | <b>1.00</b>            | <b>1.00</b> | <b>1.00</b> | <b>1.00</b> |             |             |             |
|                    | Recall      | [6,6]       | 0.90        | 0.90                   | 0.85        | 0.85        | 0.90        |             |             |             |
|                    |             | [7,7]       | <b>1.00</b> | <b>1.00</b>            | 0.90        | 0.85        | <b>1.00</b> |             |             |             |
| V5                 | Greengenes  | F1-score    | [6,6]       | <b>1.00</b>            | <b>1.00</b> | 0.99        | 0.95        | <b>1.00</b> |             |             |
|                    |             |             | [7,7]       | <b>1.00</b>            | <b>1.00</b> | <b>1.00</b> | 0.96        | <b>1.00</b> |             |             |
|                    |             | Precision   | [6,6]       | <b>1.00</b>            | <b>1.00</b> | <b>1.00</b> | <b>1.00</b> | <b>1.00</b> |             |             |
|                    | [7,7]       |             | <b>1.00</b> | <b>1.00</b>            | <b>1.00</b> | <b>1.00</b> | <b>1.00</b> |             |             |             |
|                    | Recall      | [6,6]       | <b>1.00</b> | <b>1.00</b>            | 0.97        | 0.91        | <b>1.00</b> |             |             |             |
|                    |             | [7,7]       | <b>1.00</b> | <b>1.00</b>            | <b>1.00</b> | 0.92        | <b>1.00</b> |             |             |             |
| V5                 | V5          | F1-score    | [6,6]       | <b>1.00</b>            | 0.96        | 0.96        | 0.95        | <b>1.00</b> |             |             |

Continued on next page



Supplementary Table 2: N-gram-range and confidence threshold benchmarking at family level. F1-score, precision and recall are shown for each database, evaluated region and validation datasets. The values are the average of the five metagenomic samples. Bold represents the highest value.

| Validation Dataset | Region    | Database  | Metrics     | Conf. thres.<br>N-gram | 0.5         | 0.7         | 0.9         | 0.98        | disable     |
|--------------------|-----------|-----------|-------------|------------------------|-------------|-------------|-------------|-------------|-------------|
| full-16S           | RDP       | Precision | [6,6]       | [7,7]                  | <b>1.00</b> | 0.96        | 0.96        | 0.96        | <b>1.00</b> |
|                    |           |           | [6,6]       | [7,7]                  | <b>1.00</b> | 0.99        | 0.99        | 0.99        | <b>1.00</b> |
|                    |           |           | [6,6]       | [7,7]                  | <b>1.00</b> | 0.99        | 0.99        | 0.99        | <b>1.00</b> |
|                    |           |           | [6,6]       | [7,7]                  | 0.99        | 0.95        | 0.94        | 0.94        | <b>1.00</b> |
|                    |           |           | [6,6]       | [7,7]                  | 0.99        | 0.95        | 0.94        | 0.94        | <b>1.00</b> |
|                    |           |           | [6,6]       | [7,7]                  | <b>1.00</b> | <b>1.00</b> | 0.97        | 0.95        | <b>1.00</b> |
|                    |           | [6,6]     | [7,7]       | <b>1.00</b>            | <b>1.00</b> | <b>1.00</b> | 0.95        | <b>1.00</b> |             |
|                    |           | [6,6]     | [7,7]       | <b>1.00</b>            | <b>1.00</b> | <b>1.00</b> | <b>1.00</b> | <b>1.00</b> |             |
|                    |           | [6,6]     | [7,7]       | <b>1.00</b>            | <b>1.00</b> | <b>1.00</b> | <b>1.00</b> | <b>1.00</b> |             |
|                    |           | [6,6]     | [7,7]       | <b>1.00</b>            | <b>1.00</b> | 0.95        | 0.90        | <b>1.00</b> |             |
|                    |           | [6,6]     | [7,7]       | <b>1.00</b>            | <b>1.00</b> | <b>1.00</b> | 0.90        | <b>1.00</b> |             |
|                    |           | [6,6]     | [7,7]       | <b>1.00</b>            | <b>1.00</b> | <b>1.00</b> | 0.90        | <b>1.00</b> |             |
|                    | SILVA     | F1-score  | [6,6]       | [7,7]                  | 0.99        | 0.99        | 0.99        | 0.96        | <b>1.00</b> |
|                    |           |           | [6,6]       | [7,7]                  | 0.99        | 0.99        | 0.99        | 0.94        | <b>1.00</b> |
|                    |           |           | [6,6]       | [7,7]                  | 0.99        | 0.99        | 0.99        | 0.99        | <b>1.00</b> |
|                    |           | Precision | [6,6]       | [7,7]                  | 0.99        | 0.99        | 0.99        | 0.99        | <b>1.00</b> |
|                    |           |           | [6,6]       | [7,7]                  | 0.99        | 0.99        | 0.99        | 0.99        | <b>1.00</b> |
|                    |           |           | [6,6]       | [7,7]                  | 0.99        | 0.99        | 0.99        | 0.99        | <b>1.00</b> |
|                    | Recall    | [6,6]     | [7,7]       | 0.99                   | 0.99        | 0.99        | 0.94        | <b>1.00</b> |             |
|                    |           | [6,6]     | [7,7]       | 0.99                   | 0.99        | 0.99        | 0.89        | <b>1.00</b> |             |
|                    |           | [6,6]     | [7,7]       | 0.99                   | 0.99        | 0.99        | 0.89        | <b>1.00</b> |             |
|                    | GSR       | F1-score  | [6,6]       | [7,7]                  | <b>1.00</b> | <b>1.00</b> | <b>1.00</b> | <b>1.00</b> | <b>1.00</b> |
|                    |           |           | [6,6]       | [7,7]                  | <b>1.00</b> | <b>1.00</b> | <b>1.00</b> | <b>1.00</b> | <b>1.00</b> |
|                    |           |           | [6,6]       | [7,7]                  | <b>1.00</b> | <b>1.00</b> | <b>1.00</b> | <b>1.00</b> | <b>1.00</b> |
| Precision          |           | [6,6]     | [7,7]       | <b>1.00</b>            | <b>1.00</b> | <b>1.00</b> | <b>1.00</b> | <b>1.00</b> |             |
|                    |           | [6,6]     | [7,7]       | <b>1.00</b>            | <b>1.00</b> | <b>1.00</b> | <b>1.00</b> | <b>1.00</b> |             |
|                    |           | [6,6]     | [7,7]       | <b>1.00</b>            | <b>1.00</b> | <b>1.00</b> | <b>1.00</b> | <b>1.00</b> |             |
| Recall             | [6,6]     | [7,7]     | <b>1.00</b> | <b>1.00</b>            | <b>1.00</b> | <b>1.00</b> | <b>1.00</b> |             |             |
|                    | [6,6]     | [7,7]     | <b>1.00</b> | <b>1.00</b>            | <b>1.00</b> | <b>1.00</b> | <b>1.00</b> |             |             |
|                    | [6,6]     | [7,7]     | <b>1.00</b> | <b>1.00</b>            | <b>1.00</b> | <b>1.00</b> | <b>1.00</b> |             |             |
| GTDB               | F1-score  | [6,6]     | [7,7]       | 0.97                   | 0.97        | 0.95        | 0.95        | 0.97        |             |
|                    |           | [6,6]     | [7,7]       | 0.99                   | 0.99        | 0.99        | 0.99        | 0.99        |             |
|                    |           | [6,6]     | [7,7]       | 0.99                   | 0.99        | 0.99        | 0.99        | 0.99        |             |
|                    | Precision | [6,6]     | [7,7]       | 0.99                   | 0.99        | 0.99        | 0.99        | 0.99        |             |
|                    |           | [6,6]     | [7,7]       | 0.99                   | 0.99        | 0.99        | 0.99        | 0.99        |             |
|                    |           | [6,6]     | [7,7]       | 0.99                   | 0.99        | 0.99        | 0.99        | 0.99        |             |
| Recall             | [6,6]     | [7,7]     | 0.95        | 0.95                   | 0.92        | 0.92        | 0.95        |             |             |
|                    | [6,6]     | [7,7]     | 0.99        | 0.99                   | 0.99        | 0.99        | 0.99        |             |             |
|                    | [6,6]     | [7,7]     | 0.99        | 0.99                   | 0.99        | 0.99        | 0.99        |             |             |
| Greengenes         | F1-score  | [6,6]     | [7,7]       | 0.99                   | 0.99        | 0.99        | 0.98        | 0.99        |             |
|                    |           | [6,6]     | [7,7]       | <b>1.00</b>            | <b>1.00</b> | <b>1.00</b> | <b>1.00</b> | <b>1.00</b> |             |
|                    |           | [6,6]     | [7,7]       | <b>1.00</b>            | <b>1.00</b> | <b>1.00</b> | <b>1.00</b> | <b>1.00</b> |             |
|                    | Precision | [6,6]     | [7,7]       | <b>1.00</b>            | <b>1.00</b> | <b>1.00</b> | <b>1.00</b> | <b>1.00</b> |             |
|                    |           | [6,6]     | [7,7]       | <b>1.00</b>            | <b>1.00</b> | <b>1.00</b> | <b>1.00</b> | <b>1.00</b> |             |
|                    |           | [6,6]     | [7,7]       | 0.98                   | 0.98        | 0.98        | 0.96        | 0.98        |             |
| Recall             | [6,6]     | [7,7]     | <b>1.00</b> | <b>1.00</b>            | <b>1.00</b> | <b>1.00</b> | <b>1.00</b> |             |             |
|                    | [6,6]     | [7,7]     | <b>1.00</b> | <b>1.00</b>            | <b>1.00</b> | <b>1.00</b> | <b>1.00</b> |             |             |
|                    | [6,6]     | [7,7]     | <b>1.00</b> | <b>1.00</b>            | <b>1.00</b> | <b>1.00</b> | <b>1.00</b> |             |             |
| ITGDB              | F1-score  | [6,6]     | [7,7]       | <b>1.00</b>            | 0.99        | 0.98        | 0.97        | <b>1.00</b> |             |
|                    |           | [6,6]     | [7,7]       | <b>1.00</b>            | 0.99        | 0.98        | 0.98        | <b>1.00</b> |             |
|                    |           | [6,6]     | [7,7]       | <b>1.00</b>            | <b>1.00</b> | <b>1.00</b> | <b>1.00</b> | <b>1.00</b> |             |
|                    | Precision | [6,6]     | [7,7]       | <b>1.00</b>            | <b>1.00</b> | <b>1.00</b> | <b>1.00</b> | <b>1.00</b> |             |
|                    |           | [6,6]     | [7,7]       | <b>1.00</b>            | <b>1.00</b> | <b>1.00</b> | <b>1.00</b> | <b>1.00</b> |             |
|                    |           | [6,6]     | [7,7]       | <b>1.00</b>            | 0.99        | 0.97        | 0.96        | <b>1.00</b> |             |
| Recall             | [6,6]     | [7,7]     | <b>1.00</b> | 0.99                   | 0.97        | 0.97        | <b>1.00</b> |             |             |
|                    | [6,6]     | [7,7]     | <b>1.00</b> | 0.99                   | 0.97        | 0.97        | <b>1.00</b> |             |             |
|                    | [6,6]     | [7,7]     | <b>1.00</b> | 0.99                   | 0.97        | 0.97        | <b>1.00</b> |             |             |
| RDP                | F1-score  | [6,6]     | [7,7]       | <b>1.00</b>            | <b>1.00</b> | <b>1.00</b> | <b>1.00</b> | <b>1.00</b> |             |
|                    |           | [6,6]     | [7,7]       | <b>1.00</b>            | <b>1.00</b> | <b>1.00</b> | <b>1.00</b> | <b>1.00</b> |             |
|                    |           | [6,6]     | [7,7]       | <b>1.00</b>            | <b>1.00</b> | <b>1.00</b> | <b>1.00</b> | <b>1.00</b> |             |
|                    | Precision | [6,6]     | [7,7]       | <b>1.00</b>            | <b>1.00</b> | <b>1.00</b> | <b>1.00</b> | <b>1.00</b> |             |
|                    |           | [6,6]     | [7,7]       | <b>1.00</b>            | <b>1.00</b> | <b>1.00</b> | <b>1.00</b> | <b>1.00</b> |             |
|                    |           | [6,6]     | [7,7]       | <b>1.00</b>            | <b>1.00</b> | <b>1.00</b> | <b>1.00</b> | <b>1.00</b> |             |
| Recall             | [6,6]     | [7,7]     | <b>1.00</b> | <b>1.00</b>            | <b>1.00</b> | <b>1.00</b> | <b>1.00</b> |             |             |
|                    | [6,6]     | [7,7]     | <b>1.00</b> | <b>1.00</b>            | <b>1.00</b> | <b>1.00</b> | <b>1.00</b> |             |             |
|                    | [6,6]     | [7,7]     | <b>1.00</b> | <b>1.00</b>            | <b>1.00</b> | <b>1.00</b> | <b>1.00</b> |             |             |
| SILVA              | F1-score  | [6,6]     | [7,7]       | <b>1.00</b>            | <b>1.00</b> | <b>1.00</b> | <b>1.00</b> | <b>1.00</b> |             |
|                    |           | [6,6]     | [7,7]       | <b>1.00</b>            | <b>1.00</b> | <b>1.00</b> | <b>1.00</b> | <b>1.00</b> |             |
|                    |           | [6,6]     | [7,7]       | <b>1.00</b>            | <b>1.00</b> | <b>1.00</b> | <b>1.00</b> | <b>1.00</b> |             |
|                    | Precision | [6,6]     | [7,7]       | <b>1.00</b>            | <b>1.00</b> | <b>1.00</b> | <b>1.00</b> | <b>1.00</b> |             |
|                    |           | [6,6]     | [7,7]       | <b>1.00</b>            | <b>1.00</b> | <b>1.00</b> | <b>1.00</b> | <b>1.00</b> |             |
|                    |           | [6,6]     | [7,7]       | <b>1.00</b>            | <b>1.00</b> | <b>1.00</b> | <b>1.00</b> | <b>1.00</b> |             |
| Recall             | [6,6]     | [7,7]     | <b>1.00</b> | <b>1.00</b>            | <b>1.00</b> | <b>1.00</b> | <b>1.00</b> |             |             |
|                    | [6,6]     | [7,7]     | <b>1.00</b> | <b>1.00</b>            | <b>1.00</b> | <b>1.00</b> | <b>1.00</b> |             |             |
|                    | [6,6]     | [7,7]     | <b>1.00</b> | <b>1.00</b>            | <b>1.00</b> | <b>1.00</b> | <b>1.00</b> |             |             |

Supplementary Table 3: N-gram-range and confidence threshold benchmarking at genus level. F1-score, precision and recall are shown for each database, evaluated region and validation datasets. The values are the average of the five metagenomic samples. Bold represents the highest value.

| Validation Dataset | Region     | Database  | Metrics   | Conf. thres.<br>N-gram | 0.5  | 0.7  | 0.9  | 0.98        | disable |
|--------------------|------------|-----------|-----------|------------------------|------|------|------|-------------|---------|
| V1-V3              | GSR        | F1-score  | [6,6]     | 0.98                   | 0.98 | 0.97 | 0.96 | 0.98        |         |
|                    |            |           | [7,7]     | 0.98                   | 0.98 | 0.97 | 0.97 | 0.98        |         |
|                    |            | Precision | [6,6]     | 0.99                   | 0.99 | 0.98 | 0.98 | 0.99        |         |
|                    |            |           | [7,7]     | 0.99                   | 0.99 | 0.98 | 0.98 | 0.99        |         |
|                    |            | Recall    | [6,6]     | 0.98                   | 0.98 | 0.97 | 0.96 | 0.98        |         |
|                    |            |           | [7,7]     | 0.98                   | 0.98 | 0.97 | 0.96 | 0.98        |         |
|                    |            | GTDB      | F1-score  | [6,6]                  | 0.85 | 0.82 | 0.81 | 0.79        | 0.85    |
|                    |            |           |           | [7,7]                  | 0.84 | 0.83 | 0.81 | 0.78        | 0.84    |
|                    |            |           | Precision | [6,6]                  | 0.87 | 0.86 | 0.85 | 0.85        | 0.87    |
|                    |            |           |           | [7,7]                  | 0.87 | 0.86 | 0.85 | 0.85        | 0.87    |
|                    |            |           | Recall    | [6,6]                  | 0.85 | 0.80 | 0.79 | 0.76        | 0.85    |
|                    |            |           |           | [7,7]                  | 0.83 | 0.81 | 0.79 | 0.76        | 0.83    |
|                    | Greengenes | F1-score  | [6,6]     | 0.67                   | 0.68 | 0.68 | 0.65 | 0.67        |         |
|                    |            |           | [7,7]     | 0.67                   | 0.68 | 0.68 | 0.68 | 0.67        |         |
|                    |            | Precision | [6,6]     | 0.76                   | 0.77 | 0.77 | 0.78 | 0.76        |         |
|                    |            |           | [7,7]     | 0.77                   | 0.78 | 0.78 | 0.77 | 0.77        |         |
|                    |            | Recall    | [6,6]     | 0.68                   | 0.70 | 0.69 | 0.66 | 0.69        |         |
|                    |            |           | [7,7]     | 0.69                   | 0.70 | 0.70 | 0.69 | 0.69        |         |
|                    | ITGDB      | F1-score  | [6,6]     | 0.85                   | 0.80 | 0.73 | 0.67 | 0.89        |         |
|                    |            |           | [7,7]     | 0.85                   | 0.78 | 0.74 | 0.68 | 0.89        |         |
|                    |            | Precision | [6,6]     | 0.86                   | 0.86 | 0.84 | 0.80 | 0.90        |         |
|                    |            |           | [7,7]     | 0.86                   | 0.85 | 0.84 | 0.86 | 0.90        |         |
|                    |            | Recall    | [6,6]     | 0.86                   | 0.77 | 0.69 | 0.62 | 0.90        |         |
|                    |            |           | [7,7]     | 0.85                   | 0.74 | 0.69 | 0.63 | 0.90        |         |
| RDP                | F1-score   | [6,6]     | 0.72      | 0.70                   | 0.70 | 0.69 | 0.73 |             |         |
|                    |            | [7,7]     | 0.71      | 0.71                   | 0.70 | 0.70 | 0.71 |             |         |
|                    | Precision  | [6,6]     | 0.75      | 0.74                   | 0.74 | 0.74 | 0.76 |             |         |
|                    |            | [7,7]     | 0.75      | 0.76                   | 0.74 | 0.74 | 0.75 |             |         |
|                    | Recall     | [6,6]     | 0.72      | 0.70                   | 0.70 | 0.70 | 0.73 |             |         |
|                    |            | [7,7]     | 0.71      | 0.71                   | 0.70 | 0.70 | 0.71 |             |         |
| SILVA              | F1-score   | [6,6]     | 0.90      | 0.89                   | 0.82 | 0.77 | 0.91 |             |         |
|                    |            | [7,7]     | 0.92      | 0.92                   | 0.87 | 0.85 | 0.93 |             |         |
|                    | Precision  | [6,6]     | 0.93      | 0.92                   | 0.89 | 0.87 | 0.94 |             |         |
|                    |            | [7,7]     | 0.93      | 0.93                   | 0.89 | 0.89 | 0.94 |             |         |
|                    | Recall     | [6,6]     | 0.90      | 0.88                   | 0.80 | 0.75 | 0.91 |             |         |
|                    |            | [7,7]     | 0.92      | 0.92                   | 0.87 | 0.84 | 0.92 |             |         |
| V3-V4              | GSR        | F1-score  | [6,6]     | 0.96                   | 0.98 | 0.97 | 0.94 | 0.96        |         |
|                    |            |           | [7,7]     | 0.99                   | 0.99 | 0.99 | 0.95 | 0.99        |         |
|                    |            | Precision | [6,6]     | 0.96                   | 0.99 | 0.99 | 0.95 | 0.97        |         |
|                    |            |           | [7,7]     | <b>1.00</b>            | 0.99 | 0.99 | 0.97 | <b>1.00</b> |         |
|                    |            | Recall    | [6,6]     | 0.97                   | 0.98 | 0.96 | 0.93 | 0.97        |         |
|                    |            |           | [7,7]     | 0.99                   | 0.99 | 0.98 | 0.94 | 0.99        |         |
|                    |            | GTDB      | F1-score  | [6,6]                  | 0.83 | 0.80 | 0.75 | 0.62        | 0.86    |
|                    |            |           |           | [7,7]                  | 0.82 | 0.81 | 0.75 | 0.62        | 0.86    |
|                    |            |           | Precision | [6,6]                  | 0.87 | 0.87 | 0.83 | 0.73        | 0.87    |
|                    |            |           |           | [7,7]                  | 0.87 | 0.87 | 0.84 | 0.73        | 0.87    |
|                    |            |           | Recall    | [6,6]                  | 0.82 | 0.78 | 0.72 | 0.57        | 0.86    |
|                    |            |           |           | [7,7]                  | 0.81 | 0.79 | 0.72 | 0.57        | 0.86    |
|                    | Greengenes | F1-score  | [6,6]     | 0.69                   | 0.67 | 0.66 | 0.63 | 0.69        |         |
|                    |            |           | [7,7]     | 0.70                   | 0.70 | 0.69 | 0.65 | 0.70        |         |
|                    |            | Precision | [6,6]     | 0.76                   | 0.75 | 0.73 | 0.71 | 0.76        |         |
|                    |            |           | [7,7]     | 0.77                   | 0.76 | 0.75 | 0.72 | 0.77        |         |
|                    |            | Recall    | [6,6]     | 0.71                   | 0.69 | 0.68 | 0.63 | 0.71        |         |
|                    |            |           | [7,7]     | 0.71                   | 0.71 | 0.70 | 0.66 | 0.72        |         |
|                    | ITGDB      | F1-score  | [6,6]     | 0.78                   | 0.72 | 0.58 | 0.49 | 0.90        |         |
|                    |            |           | [7,7]     | 0.82                   | 0.70 | 0.59 | 0.52 | 0.92        |         |
|                    |            | Precision | [6,6]     | 0.80                   | 0.82 | 0.79 | 0.70 | 0.91        |         |
|                    |            |           | [7,7]     | 0.84                   | 0.83 | 0.79 | 0.72 | 0.93        |         |
|                    |            | Recall    | [6,6]     | 0.77                   | 0.68 | 0.53 | 0.46 | 0.90        |         |
|                    |            |           | [7,7]     | 0.80                   | 0.66 | 0.54 | 0.47 | 0.92        |         |

Continued on next page

Supplementary Table 3: N-gram-range and confidence threshold benchmarking at genus level. F1-score, precision and recall are shown for each database, evaluated region and validation datasets. The values are the average of the five metagenomic samples. Bold represents the highest value.

| Validation Dataset | Region    | Database  | Metrics | Conf. thres.<br>N-gram | <b>0.5</b> | <b>0.7</b> | <b>0.9</b> | <b>0.98</b> | <b>disable</b> |
|--------------------|-----------|-----------|---------|------------------------|------------|------------|------------|-------------|----------------|
| V3-V5              | RDP       | F1-score  | [6,6]   | 0.91                   | 0.84       | 0.75       | 0.73       | 0.91        |                |
|                    |           |           | [7,7]   | 0.89                   | 0.84       | 0.81       | 0.74       | 0.91        |                |
|                    |           | Precision | [6,6]   | 0.92                   | 0.92       | 0.92       | 0.89       | 0.92        |                |
|                    |           |           | [7,7]   | 0.92                   | 0.92       | 0.92       | 0.91       | 0.92        |                |
|                    |           | Recall    | [6,6]   | 0.90                   | 0.81       | 0.73       | 0.70       | 0.90        |                |
|                    |           |           | [7,7]   | 0.88                   | 0.81       | 0.79       | 0.72       | 0.90        |                |
|                    | SILVA     | F1-score  | [6,6]   | 0.89                   | 0.86       | 0.83       | 0.70       | 0.89        |                |
|                    |           |           | [7,7]   | 0.88                   | 0.87       | 0.87       | 0.86       | 0.89        |                |
|                    |           | Precision | [6,6]   | 0.91                   | 0.89       | 0.87       | 0.82       | 0.91        |                |
|                    |           |           | [7,7]   | 0.91                   | 0.90       | 0.90       | 0.90       | 0.92        |                |
|                    |           | Recall    | [6,6]   | 0.87                   | 0.85       | 0.81       | 0.66       | 0.88        |                |
|                    |           |           | [7,7]   | 0.87                   | 0.86       | 0.85       | 0.84       | 0.88        |                |
|                    | GSR       | F1-score  | [6,6]   | 0.98                   | 0.97       | 0.95       | 0.92       | 0.98        |                |
|                    |           |           | [7,7]   | 0.98                   | 0.98       | 0.97       | 0.94       | 0.98        |                |
|                    |           | Precision | [6,6]   | 0.99                   | 0.97       | 0.95       | 0.94       | 0.99        |                |
|                    |           |           | [7,7]   | 0.99                   | 0.99       | 0.98       | 0.95       | 0.99        |                |
|                    |           | Recall    | [6,6]   | 0.98                   | 0.97       | 0.95       | 0.92       | 0.98        |                |
|                    |           |           | [7,7]   | 0.98                   | 0.98       | 0.97       | 0.94       | 0.98        |                |
|                    | GTDB      | F1-score  | [6,6]   | 0.85                   | 0.77       | 0.70       | 0.63       | 0.87        |                |
|                    |           |           | [7,7]   | 0.84                   | 0.78       | 0.71       | 0.64       | 0.85        |                |
|                    |           | Precision | [6,6]   | 0.88                   | 0.87       | 0.84       | 0.80       | 0.88        |                |
|                    |           |           | [7,7]   | 0.87                   | 0.87       | 0.86       | 0.84       | 0.87        |                |
|                    |           | Recall    | [6,6]   | 0.84                   | 0.75       | 0.68       | 0.61       | 0.87        |                |
|                    |           |           | [7,7]   | 0.82                   | 0.75       | 0.69       | 0.60       | 0.85        |                |
| Greengenes         | F1-score  | [6,6]     | 0.68    | 0.68                   | 0.67       | 0.66       | 0.68       |             |                |
|                    |           | [7,7]     | 0.70    | 0.69                   | 0.69       | 0.69       | 0.70       |             |                |
|                    | Precision | [6,6]     | 0.77    | 0.76                   | 0.76       | 0.76       | 0.77       |             |                |
|                    |           | [7,7]     | 0.78    | 0.77                   | 0.77       | 0.78       | 0.77       |             |                |
|                    | Recall    | [6,6]     | 0.71    | 0.70                   | 0.69       | 0.67       | 0.71       |             |                |
|                    |           | [7,7]     | 0.72    | 0.72                   | 0.71       | 0.71       | 0.72       |             |                |
| ITGDB              | F1-score  | [6,6]     | 0.82    | 0.75                   | 0.67       | 0.53       | 0.91       |             |                |
|                    |           | [7,7]     | 0.82    | 0.74                   | 0.67       | 0.55       | 0.91       |             |                |
|                    | Precision | [6,6]     | 0.84    | 0.83                   | 0.82       | 0.80       | 0.92       |             |                |
|                    |           | [7,7]     | 0.84    | 0.85                   | 0.84       | 0.83       | 0.92       |             |                |
|                    | Recall    | [6,6]     | 0.83    | 0.72                   | 0.61       | 0.47       | 0.91       |             |                |
|                    |           | [7,7]     | 0.82    | 0.69                   | 0.61       | 0.48       | 0.91       |             |                |
| RDP                | F1-score  | [6,6]     | 0.87    | 0.86                   | 0.75       | 0.72       | 0.89       |             |                |
|                    |           | [7,7]     | 0.88    | 0.86                   | 0.77       | 0.75       | 0.90       |             |                |
|                    | Precision | [6,6]     | 0.91    | 0.92                   | 0.90       | 0.88       | 0.92       |             |                |
|                    |           | [7,7]     | 0.91    | 0.91                   | 0.91       | 0.90       | 0.92       |             |                |
|                    | Recall    | [6,6]     | 0.85    | 0.83                   | 0.73       | 0.71       | 0.89       |             |                |
|                    |           | [7,7]     | 0.86    | 0.84                   | 0.76       | 0.74       | 0.90       |             |                |
| SILVA              | F1-score  | [6,6]     | 0.89    | 0.86                   | 0.82       | 0.72       | 0.91       |             |                |
|                    |           | [7,7]     | 0.91    | 0.90                   | 0.86       | 0.83       | 0.91       |             |                |
|                    | Precision | [6,6]     | 0.92    | 0.87                   | 0.86       | 0.84       | 0.93       |             |                |
|                    |           | [7,7]     | 0.93    | 0.93                   | 0.89       | 0.87       | 0.93       |             |                |
|                    | Recall    | [6,6]     | 0.89    | 0.86                   | 0.80       | 0.69       | 0.91       |             |                |
|                    |           | [7,7]     | 0.91    | 0.90                   | 0.85       | 0.82       | 0.91       |             |                |
| GSR                | F1-score  | [6,6]     | 0.95    | 0.94                   | 0.92       | 0.86       | 0.96       |             |                |
|                    |           | [7,7]     | 0.96    | 0.97                   | 0.94       | 0.88       | 0.96       |             |                |
|                    | Precision | [6,6]     | 0.95    | 0.94                   | 0.94       | 0.93       | 0.96       |             |                |
|                    |           | [7,7]     | 0.96    | 0.97                   | 0.96       | 0.94       | 0.96       |             |                |
|                    | Recall    | [6,6]     | 0.96    | 0.94                   | 0.91       | 0.83       | 0.97       |             |                |
|                    |           | [7,7]     | 0.97    | 0.96                   | 0.93       | 0.86       | 0.97       |             |                |
| GTDB               | F1-score  | [6,6]     | 0.78    | 0.72                   | 0.63       | 0.45       | 0.84       |             |                |
|                    |           | [7,7]     | 0.75    | 0.72                   | 0.64       | 0.48       | 0.82       |             |                |
|                    | Precision | [6,6]     | 0.85    | 0.81                   | 0.78       | 0.67       | 0.87       |             |                |
|                    |           | [7,7]     | 0.82    | 0.80                   | 0.81       | 0.72       | 0.84       |             |                |
|                    | Recall    | [6,6]     | 0.76    | 0.69                   | 0.60       | 0.39       | 0.83       |             |                |
|                    |           | [7,7]     | 0.73    | 0.69                   | 0.61       | 0.42       | 0.81       |             |                |
| F1-score           | [6,6]     | 0.71      | 0.70    | 0.65                   | 0.63       | 0.72       |            |             |                |

Continued on next page

Supplementary Table 3: N-gram-range and confidence threshold benchmarking at genus level. F1-score, precision and recall are shown for each database, evaluated region and validation datasets. The values are the average of the five metagenomic samples. Bold represents the highest value.

| Validation Dataset | Region     | Database               | Metrics     | Conf. thres.<br>N-gram | 0.5         | 0.7         | 0.9         | 0.98        | disable     |
|--------------------|------------|------------------------|-------------|------------------------|-------------|-------------|-------------|-------------|-------------|
| full-16S           | GSR        | ITGDB                  | Precision   | [7,7]                  | 0.71        | 0.71        | 0.67        | 0.66        | 0.72        |
|                    |            |                        |             | [6,6]                  | <b>0.79</b> | <b>0.79</b> | <b>0.76</b> | <b>0.76</b> | <b>0.80</b> |
|                    |            |                        | [7,7]       | 0.80                   | 0.79        | 0.77        | 0.77        | 0.80        |             |
|                    |            |                        | [6,6]       | <b>0.72</b>            | <b>0.71</b> | <b>0.66</b> | <b>0.63</b> | <b>0.73</b> |             |
|                    |            | Recall                 | [7,7]       | 0.72                   | 0.72        | 0.68        | 0.66        | 0.73        |             |
|                    |            |                        | [6,6]       | <b>0.78</b>            | <b>0.64</b> | <b>0.53</b> | <b>0.35</b> | <b>0.90</b> |             |
|                    |            | F1-score               | [7,7]       | 0.78                   | 0.67        | 0.53        | 0.43        | 0.89        |             |
|                    |            |                        | [6,6]       | <b>0.80</b>            | <b>0.78</b> | <b>0.76</b> | <b>0.72</b> | <b>0.91</b> |             |
|                    |            | Precision              | [7,7]       | 0.81                   | 0.81        | 0.76        | 0.75        | 0.91        |             |
|                    |            |                        | [6,6]       | <b>0.77</b>            | <b>0.60</b> | <b>0.48</b> | <b>0.30</b> | <b>0.90</b> |             |
|                    |            | Recall                 | [7,7]       | 0.76                   | 0.63        | 0.48        | 0.35        | 0.90        |             |
|                    |            |                        | [6,6]       | <b>0.89</b>            | <b>0.89</b> | <b>0.71</b> | <b>0.69</b> | <b>0.90</b> |             |
|                    | F1-score   | [7,7]                  | 0.89        | 0.89                   | 0.74        | 0.71        | 0.91        |             |             |
|                    |            | [6,6]                  | <b>0.90</b> | <b>0.90</b>            | <b>0.89</b> | <b>0.88</b> | <b>0.91</b> |             |             |
|                    | Precision  | [7,7]                  | 0.91        | 0.90                   | 0.89        | 0.89        | 0.92        |             |             |
|                    |            | [6,6]                  | <b>0.88</b> | <b>0.88</b>            | <b>0.69</b> | <b>0.67</b> | <b>0.90</b> |             |             |
|                    | Recall     | [7,7]                  | 0.89        | 0.88                   | 0.72        | 0.69        | 0.90        |             |             |
|                    |            | [6,6]                  | <b>0.87</b> | <b>0.85</b>            | <b>0.71</b> | <b>0.58</b> | <b>0.88</b> |             |             |
|                    | F1-score   | [7,7]                  | 0.87        | 0.87                   | 0.83        | 0.59        | 0.88        |             |             |
|                    |            | [6,6]                  | <b>0.90</b> | <b>0.89</b>            | <b>0.87</b> | <b>0.81</b> | <b>0.90</b> |             |             |
|                    | Precision  | [7,7]                  | 0.90        | 0.90                   | 0.89        | 0.86        | 0.91        |             |             |
|                    |            | [6,6]                  | <b>0.86</b> | <b>0.84</b>            | <b>0.68</b> | <b>0.56</b> | <b>0.87</b> |             |             |
|                    | Recall     | [7,7]                  | 0.86        | 0.85                   | 0.80        | 0.57        | 0.86        |             |             |
|                    |            | [6,6]                  | <b>1.00</b> | 0.99                   | 0.98        | 0.95        | <b>1.00</b> |             |             |
|                    | F1-score   | [7,7]                  | <b>1.00</b> | <b>1.00</b>            | 0.99        | 0.98        | <b>1.00</b> |             |             |
|                    |            | [6,6]                  | <b>1.00</b> | 0.99                   | 0.99        | 0.96        | <b>1.00</b> |             |             |
|                    | Precision  | [7,7]                  | <b>1.00</b> | <b>1.00</b>            | 0.99        | 0.99        | <b>1.00</b> |             |             |
|                    |            | [6,6]                  | <b>1.00</b> | 0.99                   | 0.98        | 0.95        | <b>1.00</b> |             |             |
|                    | Recall     | [7,7]                  | <b>1.00</b> | <b>1.00</b>            | 0.99        | 0.98        | <b>1.00</b> |             |             |
|                    |            | [6,6]                  | <b>1.00</b> | <b>1.00</b>            | 0.99        | 0.98        | <b>1.00</b> |             |             |
|                    | GTDB       | F1-score               | [7,7]       | 0.75                   | 0.61        | 0.54        | 0.49        | 0.80        |             |
|                    |            |                        | [6,6]       | <b>0.83</b>            | <b>0.81</b> | <b>0.79</b> | <b>0.75</b> | <b>0.84</b> |             |
|                    |            | Precision              | [7,7]       | 0.79                   | 0.79        | 0.75        | 0.76        | 0.79        |             |
|                    |            |                        | [6,6]       | <b>0.72</b>            | <b>0.60</b> | <b>0.54</b> | <b>0.48</b> | <b>0.78</b> |             |
|                    | Recall     | [7,7]                  | 0.75        | 0.70                   | 0.62        | 0.59        | 0.75        |             |             |
|                    |            | [6,6]                  | <b>0.71</b> | <b>0.70</b>            | <b>0.69</b> | <b>0.66</b> | <b>0.71</b> |             |             |
|                    | Greengenes | F1-score               | [7,7]       | 0.72                   | 0.72        | 0.71        | 0.70        | 0.72        |             |
|                    |            |                        | [6,6]       | <b>0.79</b>            | <b>0.79</b> | <b>0.78</b> | <b>0.79</b> | <b>0.80</b> |             |
|                    |            | Precision              | [7,7]       | 0.80                   | 0.80        | 0.79        | 0.79        | 0.80        |             |
|                    |            |                        | [6,6]       | <b>0.73</b>            | <b>0.72</b> | <b>0.70</b> | <b>0.66</b> | <b>0.73</b> |             |
|                    | Recall     | [7,7]                  | 0.74        | 0.73                   | 0.73        | 0.72        | 0.74        |             |             |
|                    |            | [6,6]                  | <b>0.87</b> | <b>0.83</b>            | <b>0.75</b> | <b>0.61</b> | <b>0.92</b> |             |             |
|                    | F1-score   | [7,7]                  | 0.87        | 0.84                   | 0.75        | 0.66        | 0.93        |             |             |
|                    |            | [6,6]                  | <b>0.87</b> | <b>0.89</b>            | <b>0.88</b> | <b>0.80</b> | <b>0.93</b> |             |             |
|                    | Precision  | [7,7]                  | 0.88        | 0.89                   | 0.89        | 0.84        | 0.94        |             |             |
|                    |            | [6,6]                  | <b>0.88</b> | <b>0.80</b>            | <b>0.70</b> | <b>0.55</b> | <b>0.92</b> |             |             |
|                    | Recall     | [7,7]                  | 0.88        | 0.81                   | 0.69        | 0.59        | 0.93        |             |             |
|                    |            | [6,6]                  | <b>0.91</b> | <b>0.91</b>            | <b>0.89</b> | <b>0.88</b> | <b>0.91</b> |             |             |
| F1-score           | [7,7]      | 0.91                   | 0.91        | 0.91                   | 0.89        | 0.91        |             |             |             |
|                    | [6,6]      | <b>0.92</b>            | <b>0.92</b> | <b>0.92</b>            | <b>0.91</b> | <b>0.93</b> |             |             |             |
| Precision          | [7,7]      | 0.92                   | 0.93        | 0.92                   | 0.92        | 0.92        |             |             |             |
|                    | [6,6]      | <b>0.90</b>            | <b>0.90</b> | <b>0.88</b>            | <b>0.86</b> | <b>0.90</b> |             |             |             |
| Recall             | [7,7]      | 0.91                   | 0.90        | 0.90                   | 0.89        | 0.91        |             |             |             |
|                    | [6,6]      | <b>0.92</b>            | <b>0.92</b> | <b>0.89</b>            | <b>0.82</b> | <b>0.93</b> |             |             |             |
| F1-score           | [7,7]      | 0.94                   | 0.94        | 0.93                   | 0.92        | 0.94        |             |             |             |
|                    | [6,6]      | <b>0.94</b>            | <b>0.93</b> | <b>0.91</b>            | <b>0.87</b> | <b>0.95</b> |             |             |             |
| Precision          | [7,7]      | 0.96                   | 0.95        | 0.94                   | 0.94        | 0.95        |             |             |             |
|                    | [6,6]      | <b>0.92</b>            | <b>0.92</b> | <b>0.88</b>            | <b>0.79</b> | <b>0.93</b> |             |             |             |
| Recall             | [7,7]      | 0.94                   | 0.94        | 0.93                   | 0.92        | 0.94        |             |             |             |
|                    | [6,6]      | <b>0.89</b>            | <b>0.88</b> | <b>0.86</b>            | <b>0.86</b> | <b>0.91</b> |             |             |             |
| F1-score           | [7,7]      | 0.89                   | 0.88        | 0.88                   | 0.87        | 0.90        |             |             |             |
|                    | [6,6]      | <b>0.89</b>            | <b>0.88</b> | <b>0.86</b>            | <b>0.86</b> | <b>0.91</b> |             |             |             |
| GSR                |            | Continued on next page |             |                        |             |             |             |             |             |

Supplementary Table 3: N-gram-range and confidence threshold benchmarking at genus level. F1-score, precision and recall are shown for each database, evaluated region and validation datasets. The values are the average of the five metagenomic samples. Bold represents the highest value.

| Validation Dataset | Region    | Database  | Metrics    | Conf. thres.<br>N-gram | <b>0.5</b> | <b>0.7</b> | <b>0.9</b> | <b>0.98</b> | <b>disable</b> |      |
|--------------------|-----------|-----------|------------|------------------------|------------|------------|------------|-------------|----------------|------|
|                    |           |           | Precision  | [6,6]                  | 0.91       | 0.88       | 0.87       | 0.87        | 0.94           |      |
|                    |           |           |            | [7,7]                  | 0.91       | 0.88       | 0.88       | 0.87        | 0.93           |      |
|                    |           |           | Recall     | [6,6]                  | 0.89       | 0.88       | 0.86       | 0.86        | 0.90           |      |
|                    |           |           |            | [7,7]                  | 0.89       | 0.88       | 0.87       | 0.86        | 0.90           |      |
|                    |           |           | GTDB       | F1-score               | [6,6]      | 0.85       | 0.83       | 0.82        | 0.81           | 0.85 |
|                    |           |           |            |                        | [7,7]      | 0.84       | 0.84       | 0.82        | 0.82           | 0.85 |
|                    |           |           |            | Precision              | [6,6]      | 0.90       | 0.89       | 0.86        | 0.85           | 0.90 |
|                    |           |           |            |                        | [7,7]      | 0.90       | 0.90       | 0.87        | 0.86           | 0.89 |
|                    |           |           |            | Recall                 | [6,6]      | 0.83       | 0.82       | 0.81        | 0.79           | 0.84 |
|                    |           |           |            |                        | [7,7]      | 0.82       | 0.82       | 0.81        | 0.80           | 0.84 |
|                    |           |           | Greengenes | F1-score               | [6,6]      | 0.81       | 0.81       | 0.77        | 0.70           | 0.81 |
|                    |           |           |            |                        | [7,7]      | 0.82       | 0.81       | 0.79        | 0.76           | 0.82 |
|                    |           |           |            | Precision              | [6,6]      | 0.84       | 0.84       | 0.79        | 0.73           | 0.84 |
|                    |           |           |            |                        | [7,7]      | 0.85       | 0.85       | 0.83        | 0.78           | 0.85 |
|                    |           |           |            | Recall                 | [6,6]      | 0.81       | 0.81       | 0.77        | 0.70           | 0.81 |
|                    |           |           |            |                        | [7,7]      | 0.82       | 0.81       | 0.79        | 0.76           | 0.82 |
|                    |           |           | ITGDB      | F1-score               | [6,6]      | 0.78       | 0.73       | 0.62        | 0.42           | 0.83 |
|                    |           |           |            |                        | [7,7]      | 0.79       | 0.73       | 0.63        | 0.44           | 0.83 |
|                    |           |           |            | Precision              | [6,6]      | 0.83       | 0.81       | 0.77        | 0.52           | 0.86 |
|                    |           |           |            |                        | [7,7]      | 0.83       | 0.81       | 0.73        | 0.54           | 0.86 |
|                    |           |           |            | Recall                 | [6,6]      | 0.77       | 0.69       | 0.58        | 0.39           | 0.83 |
|                    |           |           |            |                        | [7,7]      | 0.78       | 0.70       | 0.59        | 0.41           | 0.83 |
|                    |           |           | RDP        | F1-score               | [6,6]      | 0.79       | 0.79       | 0.77        | 0.77           | 0.80 |
|                    |           |           |            |                        | [7,7]      | 0.79       | 0.79       | 0.79        | 0.77           | 0.80 |
| Precision          | [6,6]     | 0.83      |            | 0.83                   | 0.82       | 0.81       | 0.83       |             |                |      |
|                    | [7,7]     | 0.83      |            | 0.83                   | 0.83       | 0.81       | 0.83       |             |                |      |
| Recall             | [6,6]     | 0.78      |            | 0.78                   | 0.76       | 0.76       | 0.79       |             |                |      |
|                    | [7,7]     | 0.78      |            | 0.78                   | 0.78       | 0.76       | 0.79       |             |                |      |
| SILVA              | F1-score  | [6,6]     | 0.92       | 0.92                   | 0.83       | 0.78       | 0.91       |             |                |      |
|                    |           | [7,7]     | 0.92       | 0.92                   | 0.89       | 0.83       | 0.92       |             |                |      |
|                    | Precision | [6,6]     | 0.96       | 0.96                   | 0.88       | 0.84       | 0.95       |             |                |      |
|                    |           | [7,7]     | 0.96       | 0.96                   | 0.95       | 0.88       | 0.96       |             |                |      |
|                    | Recall    | [6,6]     | 0.91       | 0.91                   | 0.83       | 0.76       | 0.90       |             |                |      |
|                    |           | [7,7]     | 0.92       | 0.92                   | 0.87       | 0.81       | 0.92       |             |                |      |
| V3-V4              | GSR       | F1-score  | [6,6]      | 0.93                   | 0.93       | 0.91       | 0.91       | 0.99        |                |      |
|                    |           |           | [7,7]      | 0.96                   | 0.93       | 0.93       | 0.91       | 0.99        |                |      |
|                    |           | Precision | [6,6]      | 0.93                   | 0.93       | 0.91       | 0.91       | 0.99        |                |      |
|                    |           |           | [7,7]      | 0.96                   | 0.93       | 0.93       | 0.91       | 0.99        |                |      |
|                    |           | Recall    | [6,6]      | 0.93                   | 0.93       | 0.91       | 0.91       | 0.99        |                |      |
|                    |           |           | [7,7]      | 0.96                   | 0.93       | 0.93       | 0.91       | 0.99        |                |      |
|                    | GTDB      | F1-score  | [6,6]      | 0.89                   | 0.89       | 0.84       | 0.79       | 0.98        |                |      |
|                    |           |           | [7,7]      | 0.89                   | 0.89       | 0.82       | 0.79       | 0.98        |                |      |
|                    |           | Precision | [6,6]      | 0.89                   | 0.89       | 0.84       | 0.79       | 0.98        |                |      |
|                    |           |           | [7,7]      | 0.89                   | 0.89       | 0.82       | 0.79       | 0.98        |                |      |
|                    |           | Recall    | [6,6]      | 0.89                   | 0.89       | 0.84       | 0.79       | 0.98        |                |      |
|                    |           |           | [7,7]      | 0.89                   | 0.89       | 0.82       | 0.79       | 0.98        |                |      |
| Greengenes         | F1-score  | [6,6]     | 0.92       | 0.88                   | 0.77       | 0.64       | 0.92       |             |                |      |
|                    |           | [7,7]     | 0.92       | 0.88                   | 0.83       | 0.75       | 0.92       |             |                |      |
|                    | Precision | [6,6]     | 0.92       | 0.87                   | 0.77       | 0.64       | 0.92       |             |                |      |
|                    |           | [7,7]     | 0.92       | 0.87                   | 0.82       | 0.74       | 0.92       |             |                |      |
|                    | Recall    | [6,6]     | 0.93       | 0.89                   | 0.78       | 0.66       | 0.93       |             |                |      |
|                    |           | [7,7]     | 0.93       | 0.89                   | 0.84       | 0.76       | 0.93       |             |                |      |
| ITGDB              | F1-score  | [6,6]     | 0.96       | 0.82                   | 0.60       | 0.54       | 0.99       |             |                |      |
|                    |           | [7,7]     | 0.96       | 0.82                   | 0.60       | 0.49       | 0.99       |             |                |      |
|                    | Precision | [6,6]     | 0.96       | 0.82                   | 0.60       | 0.54       | 0.99       |             |                |      |
|                    |           | [7,7]     | 0.96       | 0.82                   | 0.60       | 0.49       | 0.99       |             |                |      |
|                    | Recall    | [6,6]     | 0.96       | 0.82                   | 0.60       | 0.54       | 0.99       |             |                |      |
|                    |           | [7,7]     | 0.96       | 0.82                   | 0.60       | 0.49       | 0.99       |             |                |      |
| RDP                | F1-score  | [6,6]     | 0.80       | 0.71                   | 0.64       | 0.64       | 0.80       |             |                |      |
|                    |           | [7,7]     | 0.71       | 0.71                   | 0.65       | 0.64       | 0.80       |             |                |      |
|                    | Precision | [6,6]     | 0.80       | 0.71                   | 0.64       | 0.64       | 0.80       |             |                |      |

Continued on next page

Supplementary Table 3: N-gram-range and confidence threshold benchmarking at genus level. F1-score, precision and recall are shown for each database, evaluated region and validation datasets. The values are the average of the five metagenomic samples. Bold represents the highest value.

| Validation Dataset | Region     | Database  | Metrics     | Conf. thres.<br>N-gram | 0.5         | 0.7         | 0.9         | 0.98        | disable     |             |
|--------------------|------------|-----------|-------------|------------------------|-------------|-------------|-------------|-------------|-------------|-------------|
| V3-V5              | V3         | SILVA     | Recall      | [7,7]                  | 0.71        | 0.71        | 0.65        | 0.64        | 0.80        |             |
|                    |            |           |             | [6,6]                  | <b>0.80</b> | 0.71        | 0.64        | 0.64        | 0.80        |             |
|                    |            |           |             | [7,7]                  | 0.71        | 0.71        | 0.65        | 0.64        | 0.80        |             |
|                    |            |           | F1-score    | [6,6]                  | <b>0.99</b> | <b>0.97</b> | <b>0.96</b> | <b>0.85</b> | <b>0.99</b> |             |
|                    |            |           |             | [7,7]                  | 0.99        | 0.99        | 0.97        | 0.96        | 0.99        |             |
|                    |            |           |             | [6,6]                  | <b>0.99</b> | <b>0.97</b> | <b>0.96</b> | <b>0.84</b> | <b>0.99</b> |             |
|                    |            |           | Precision   | [7,7]                  | 0.99        | 0.99        | 0.97        | 0.96        | 0.99        |             |
|                    |            |           |             | [6,6]                  | <b>0.99</b> | <b>0.97</b> | <b>0.96</b> | <b>0.88</b> | <b>0.99</b> |             |
|                    |            |           |             | [7,7]                  | 0.99        | 0.99        | 0.97        | 0.96        | 0.99        |             |
|                    |            |           | Recall      | [6,6]                  | <b>0.99</b> | <b>0.97</b> | <b>0.96</b> | <b>0.88</b> | <b>0.99</b> |             |
|                    |            |           |             | [7,7]                  | 0.99        | 0.99        | 0.97        | 0.96        | 0.99        |             |
|                    |            |           |             | [6,6]                  | <b>0.84</b> | <b>0.82</b> | <b>0.80</b> | <b>0.78</b> | <b>0.86</b> |             |
|                    |            | GSR       | F1-score    | [7,7]                  | 0.84        | 0.83        | 0.81        | 0.79        | 0.86        |             |
|                    |            |           |             | [6,6]                  | <b>0.83</b> | <b>0.82</b> | <b>0.80</b> | <b>0.78</b> | <b>0.88</b> |             |
|                    |            |           |             | [7,7]                  | 0.85        | 0.82        | 0.81        | 0.78        | 0.88        |             |
|                    |            |           | Precision   | [6,6]                  | <b>0.86</b> | <b>0.84</b> | <b>0.82</b> | <b>0.80</b> | <b>0.88</b> |             |
|                    |            |           |             | [7,7]                  | 0.86        | 0.84        | 0.82        | 0.80        | 0.88        |             |
|                    |            |           |             | [6,6]                  | <b>0.79</b> | <b>0.79</b> | <b>0.76</b> | <b>0.71</b> | <b>0.83</b> |             |
|                    |            |           | Recall      | [7,7]                  | 0.79        | 0.79        | 0.75        | 0.71        | 0.83        |             |
|                    |            |           |             | [6,6]                  | <b>0.84</b> | <b>0.84</b> | <b>0.81</b> | <b>0.76</b> | <b>0.85</b> |             |
|                    |            |           |             | [7,7]                  | 0.84        | 0.84        | 0.80        | 0.77        | 0.85        |             |
|                    |            |           | GTDB        | F1-score               | [6,6]       | <b>0.80</b> | <b>0.80</b> | <b>0.77</b> | <b>0.71</b> | <b>0.84</b> |
|                    |            |           |             |                        | [7,7]       | 0.80        | 0.80        | 0.75        | 0.72        | 0.84        |
|                    |            |           |             |                        | [6,6]       | <b>0.77</b> | <b>0.75</b> | <b>0.69</b> | <b>0.60</b> | <b>0.77</b> |
|                    | Precision  | [7,7]     |             | 0.77                   | 0.75        | 0.72        | 0.64        | 0.77        |             |             |
|                    |            | [6,6]     |             | <b>0.78</b>            | <b>0.75</b> | <b>0.70</b> | <b>0.61</b> | <b>0.78</b> |             |             |
|                    |            | [7,7]     |             | 0.79                   | 0.75        | 0.73        | 0.67        | 0.78        |             |             |
|                    | Recall     | [6,6]     |             | <b>0.79</b>            | <b>0.77</b> | <b>0.71</b> | <b>0.62</b> | <b>0.79</b> |             |             |
|                    |            | [7,7]     |             | 0.80                   | 0.77        | 0.74        | 0.66        | 0.80        |             |             |
|                    |            | [6,6]     |             | <b>0.83</b>            | <b>0.70</b> | <b>0.45</b> | <b>0.36</b> | <b>0.89</b> |             |             |
|                    | Greengenes | F1-score  |             | [7,7]                  | 0.83        | 0.69        | 0.46        | 0.37        | 0.89        |             |
|                    |            |           |             | [6,6]                  | <b>0.85</b> | <b>0.78</b> | <b>0.50</b> | <b>0.37</b> | <b>0.90</b> |             |
|                    |            |           |             | [7,7]                  | 0.86        | 0.77        | 0.53        | 0.38        | 0.90        |             |
|                    |            | Precision | [6,6]       | <b>0.84</b>            | <b>0.68</b> | <b>0.46</b> | <b>0.37</b> | <b>0.90</b> |             |             |
|                    |            |           | [7,7]       | 0.84                   | 0.68        | 0.46        | 0.38        | 0.90        |             |             |
|                    |            |           | [6,6]       | <b>0.80</b>            | <b>0.79</b> | <b>0.70</b> | <b>0.70</b> | <b>0.83</b> |             |             |
|                    |            | Recall    | [7,7]       | 0.80                   | 0.79        | 0.72        | 0.70        | 0.83        |             |             |
|                    |            |           | [6,6]       | <b>0.85</b>            | <b>0.84</b> | <b>0.71</b> | <b>0.71</b> | <b>0.85</b> |             |             |
|                    |            |           | [7,7]       | 0.85                   | 0.85        | 0.72        | 0.71        | 0.85        |             |             |
|                    |            | ITGDB     | F1-score    | [6,6]                  | <b>0.79</b> | <b>0.77</b> | <b>0.70</b> | <b>0.69</b> | <b>0.82</b> |             |
|                    |            |           |             | [7,7]                  | 0.79        | 0.78        | 0.71        | 0.70        | 0.82        |             |
|                    |            |           |             | [6,6]                  | <b>0.86</b> | <b>0.85</b> | <b>0.83</b> | <b>0.80</b> | <b>0.86</b> |             |
|                    | Precision  |           | [7,7]       | 0.87                   | 0.87        | 0.86        | 0.84        | 0.86        |             |             |
|                    |            |           | [6,6]       | <b>0.92</b>            | <b>0.89</b> | <b>0.85</b> | <b>0.83</b> | <b>0.92</b> |             |             |
|                    |            |           | [7,7]       | 0.92                   | 0.93        | 0.92        | 0.86        | 0.92        |             |             |
|                    | Recall     |           | [6,6]       | <b>0.87</b>            | <b>0.85</b> | <b>0.84</b> | <b>0.80</b> | <b>0.87</b> |             |             |
|                    |            |           | [7,7]       | 0.87                   | 0.88        | 0.87        | 0.85        | 0.87        |             |             |
|                    |            |           | [6,6]       | <b>0.96</b>            | <b>0.90</b> | <b>0.86</b> | <b>0.81</b> | <b>0.96</b> |             |             |
| RDP                | F1-score   |           | [7,7]       | 0.96                   | 0.91        | 0.88        | 0.81        | 0.96        |             |             |
|                    |            |           | [6,6]       | <b>0.96</b>            | <b>0.90</b> | <b>0.86</b> | <b>0.81</b> | <b>0.96</b> |             |             |
|                    |            |           | [7,7]       | 0.96                   | 0.91        | 0.88        | 0.81        | 0.96        |             |             |
|                    | Precision  | [6,6]     | <b>0.96</b> | <b>0.90</b>            | <b>0.86</b> | <b>0.81</b> | <b>0.96</b> |             |             |             |
|                    |            | [7,7]     | 0.96        | 0.91                   | 0.88        | 0.81        | 0.96        |             |             |             |
|                    |            | [6,6]     | <b>0.80</b> | <b>0.80</b>            | <b>0.72</b> | <b>0.58</b> | <b>0.88</b> |             |             |             |
|                    | Recall     | [7,7]     | 0.80        | 0.77                   | 0.72        | 0.58        | 0.88        |             |             |             |
|                    |            | [6,6]     | <b>0.81</b> | <b>0.81</b>            | <b>0.72</b> | <b>0.59</b> | <b>0.89</b> |             |             |             |
|                    |            | [7,7]     | 0.81        | 0.78                   | 0.72        | 0.59        | 0.89        |             |             |             |
|                    | SILVA      | F1-score  | [6,6]       | <b>0.79</b>            | <b>0.79</b> | <b>0.71</b> | <b>0.58</b> | <b>0.88</b> |             |             |
|                    |            |           | [7,7]       | 0.79                   | 0.77        | 0.71        | 0.58        | 0.88        |             |             |
|                    |            |           | [6,6]       | <b>0.85</b>            | <b>0.80</b> | <b>0.66</b> | <b>0.66</b> | <b>0.89</b> |             |             |
| Precision          |            | [7,7]     | 0.85        | 0.81                   | 0.71        | 0.67        | 0.89        |             |             |             |
|                    |            | [6,6]     | <b>0.85</b> | <b>0.80</b>            | <b>0.65</b> | <b>0.65</b> | <b>0.88</b> |             |             |             |
|                    |            | [7,7]     | 0.85        | 0.81                   | 0.70        | 0.66        | 0.88        |             |             |             |

Continued on next page

Supplementary Table 3: N-gram-range and confidence threshold benchmarking at genus level. F1-score, precision and recall are shown for each database, evaluated region and validation datasets. The values are the average of the five metagenomic samples. Bold represents the highest value.

| Validation Dataset | Region     | Database  | Metrics     | Conf. thres.<br>N-gram | <b>0.5</b>  | <b>0.7</b>  | <b>0.9</b>  | <b>0.98</b> | <b>disable</b> |
|--------------------|------------|-----------|-------------|------------------------|-------------|-------------|-------------|-------------|----------------|
| full-16S           | ITGDB      | Recall    | [6,6]       | 0.86                   | 0.81        | 0.67        | 0.67        | 0.90        |                |
|                    |            |           | [7,7]       | 0.86                   | 0.83        | 0.72        | 0.68        | 0.90        |                |
|                    |            | F1-score  | [6,6]       | 0.96                   | 0.76        | 0.50        | 0.22        | 0.97        |                |
|                    |            |           | [7,7]       | 0.95                   | 0.76        | 0.50        | 0.37        | 0.99        |                |
|                    |            | Precision | [6,6]       | 0.96                   | 0.77        | 0.50        | 0.22        | 0.97        |                |
|                    |            |           | [7,7]       | 0.95                   | 0.76        | 0.50        | 0.37        | 0.99        |                |
|                    |            | Recall    | [6,6]       | 0.96                   | 0.75        | 0.50        | 0.22        | 0.97        |                |
|                    |            |           | [7,7]       | 0.95                   | 0.76        | 0.50        | 0.37        | 0.99        |                |
|                    |            | RDP       | F1-score    | [6,6]                  | 0.75        | 0.72        | 0.63        | 0.60        | 0.79           |
|                    |            |           |             | [7,7]                  | 0.75        | 0.72        | 0.62        | 0.62        | 0.79           |
|                    |            |           | Precision   | [6,6]                  | 0.75        | 0.72        | 0.63        | 0.60        | 0.79           |
|                    |            |           |             | [7,7]                  | 0.75        | 0.72        | 0.62        | 0.62        | 0.79           |
|                    | Recall     | [6,6]     | 0.75        | 0.72                   | 0.63        | 0.60        | 0.79        |             |                |
|                    |            | [7,7]     | 0.75        | 0.72                   | 0.62        | 0.62        | 0.79        |             |                |
|                    | SILVA      | F1-score  | [6,6]       | 0.95                   | 0.92        | 0.80        | 0.78        | 0.98        |                |
|                    |            |           | [7,7]       | 0.95                   | 0.92        | 0.83        | 0.78        | 0.98        |                |
|                    |            | Precision | [6,6]       | 0.95                   | 0.92        | 0.79        | 0.77        | 0.98        |                |
|                    |            |           | [7,7]       | 0.95                   | 0.92        | 0.82        | 0.77        | 0.98        |                |
|                    | Recall     | [6,6]     | 0.95        | 0.92                   | 0.83        | 0.81        | 0.98        |             |                |
|                    |            | [7,7]     | 0.95        | 0.92                   | 0.85        | 0.81        | 0.98        |             |                |
|                    | GSR        | F1-score  | [6,6]       | 0.84                   | 0.83        | 0.83        | 0.81        | 0.85        |                |
|                    |            |           | [7,7]       | 0.84                   | 0.83        | 0.83        | 0.82        | 0.86        |                |
|                    |            | Precision | [6,6]       | 0.85                   | 0.82        | 0.82        | 0.81        | 0.87        |                |
|                    |            |           | [7,7]       | 0.84                   | 0.82        | 0.82        | 0.82        | 0.87        |                |
|                    |            | Recall    | [6,6]       | 0.85                   | 0.84        | 0.84        | 0.83        | 0.87        |                |
|                    |            |           | [7,7]       | 0.86                   | 0.84        | 0.84        | 0.84        | 0.87        |                |
|                    |            | GTDB      | F1-score    | [6,6]                  | 0.75        | 0.73        | 0.69        | 0.62        | 0.79           |
|                    |            |           |             | [7,7]                  | 0.76        | 0.73        | 0.73        | 0.68        | 0.79           |
|                    | Precision  |           | [6,6]       | 0.80                   | 0.76        | 0.72        | 0.63        | 0.82        |                |
|                    |            |           | [7,7]       | 0.78                   | 0.76        | 0.76        | 0.72        | 0.82        |                |
|                    | Recall     | [6,6]     | 0.76        | 0.74                   | 0.70        | 0.63        | 0.80        |             |                |
|                    |            | [7,7]     | 0.77        | 0.74                   | 0.74        | 0.69        | 0.80        |             |                |
|                    | Greengenes | F1-score  | [6,6]       | 0.77                   | 0.75        | 0.73        | 0.66        | 0.77        |                |
|                    |            |           | [7,7]       | 0.79                   | 0.78        | 0.76        | 0.75        | 0.79        |                |
|                    |            | Precision | [6,6]       | 0.79                   | 0.76        | 0.74        | 0.68        | 0.78        |                |
|                    |            |           | [7,7]       | 0.80                   | 0.80        | 0.76        | 0.76        | 0.80        |                |
|                    | Recall     | [6,6]     | 0.79        | 0.78                   | 0.74        | 0.66        | 0.79        |             |                |
|                    |            | [7,7]     | 0.81        | 0.80                   | 0.78        | 0.77        | 0.81        |             |                |
|                    | ITGDB      | F1-score  | [6,6]       | 0.88                   | 0.80        | 0.58        | 0.40        | 0.89        |                |
|                    |            |           | [7,7]       | 0.87                   | 0.82        | 0.62        | 0.48        | 0.89        |                |
| Precision          |            | [6,6]     | 0.90        | 0.87                   | 0.68        | 0.48        | 0.91        |             |                |
|                    |            | [7,7]     | 0.90        | 0.87                   | 0.76        | 0.58        | 0.90        |             |                |
| Recall             | [6,6]      | 0.89      | 0.79        | 0.57                   | 0.39        | 0.90        |             |             |                |
|                    | [7,7]      | 0.88      | 0.80        | 0.59                   | 0.47        | 0.90        |             |             |                |
| RDP                | F1-score   | [6,6]     | 0.83        | 0.82                   | 0.79        | 0.76        | 0.83        |             |                |
|                    |            | [7,7]     | 0.83        | 0.83                   | 0.82        | 0.79        | 0.83        |             |                |
|                    | Precision  | [6,6]     | 0.86        | 0.85                   | 0.82        | 0.78        | 0.86        |             |                |
|                    |            | [7,7]     | 0.86        | 0.86                   | 0.86        | 0.80        | 0.85        |             |                |
| Recall             | [6,6]      | 0.82      | 0.81        | 0.78                   | 0.75        | 0.82        |             |             |                |
|                    | [7,7]      | 0.82      | 0.82        | 0.80                   | 0.78        | 0.83        |             |             |                |
| SILVA              | F1-score   | [6,6]     | 0.87        | 0.90                   | 0.88        | 0.84        | 0.86        |             |                |
|                    |            | [7,7]     | 0.87        | 0.87                   | 0.93        | 0.89        | 0.87        |             |                |
|                    | Precision  | [6,6]     | 0.93        | 0.95                   | 0.89        | 0.86        | 0.92        |             |                |
|                    |            | [7,7]     | 0.93        | 0.93                   | 0.95        | 0.93        | 0.92        |             |                |
| Recall             | [6,6]      | 0.88      | 0.90        | 0.89                   | 0.85        | 0.87        |             |             |                |
|                    | [7,7]      | 0.88      | 0.88        | 0.92                   | 0.89        | 0.88        |             |             |                |
| GSR                | F1-score   | [6,6]     | 0.98        | 0.98                   | 0.98        | 0.98        | 0.98        |             |                |
|                    |            | [7,7]     | 0.98        | 0.98                   | 0.98        | 0.98        | 0.98        |             |                |
|                    | Precision  | [6,6]     | <b>1.00</b> | <b>1.00</b>            | <b>1.00</b> | <b>1.00</b> | <b>1.00</b> |             |                |
|                    |            | [7,7]     | <b>1.00</b> | <b>1.00</b>            | <b>1.00</b> | <b>1.00</b> | <b>1.00</b> |             |                |
| Recall             | [6,6]      | 0.95      | 0.95        | 0.95                   | 0.95        | 0.95        |             |             |                |
|                    | [7,7]      | 0.95      | 0.95        | 0.95                   | 0.95        | 0.95        |             |             |                |

Continued on next page

Supplementary Table 3: N-gram-range and confidence threshold benchmarking at genus level. F1-score, precision and recall are shown for each database, evaluated region and validation datasets. The values are the average of the five metagenomic samples. Bold represents the highest value.

| Validation Dataset | Region    | Database  | Metrics     | Conf. thres.<br>N-gram | 0.5         | 0.7         | 0.9         | 0.98        | disable |
|--------------------|-----------|-----------|-------------|------------------------|-------------|-------------|-------------|-------------|---------|
| V3-V4              | GTDB      | F1-score  | [6,6]       | [7,7]                  | 0.95        | 0.95        | 0.95        | 0.95        | 0.95    |
|                    |           |           | [6,6]       | 0.89                   | 0.89        | 0.89        | 0.89        | 0.89        |         |
|                    |           |           | [7,7]       | 0.89                   | 0.89        | 0.89        | 0.89        | 0.89        |         |
|                    |           |           | [6,6]       | 0.93                   | 0.93        | 0.93        | 0.93        | 0.93        |         |
|                    |           |           | [7,7]       | 0.93                   | 0.93        | 0.93        | 0.93        | 0.93        |         |
|                    |           |           | [6,6]       | 0.85                   | 0.85        | 0.85        | 0.85        | 0.85        |         |
|                    |           | Precision | [6,6]       | 0.94                   | 0.94        | 0.94        | 0.94        | 0.94        |         |
|                    |           |           | [7,7]       | 0.95                   | 0.94        | 0.94        | 0.94        | 0.95        |         |
|                    |           |           | [6,6]       | 0.97                   | 0.97        | 0.97        | 0.97        | 0.97        |         |
|                    |           |           | [7,7]       | <b>1.00</b>            | 0.97        | 0.97        | 0.97        | <b>1.00</b> |         |
|                    |           |           | [6,6]       | 0.92                   | 0.92        | 0.92        | 0.92        | 0.92        |         |
|                    |           |           | [7,7]       | 0.93                   | 0.92        | 0.92        | 0.92        | 0.93        |         |
|                    | Recall    | [6,6]     | 0.95        | 0.94                   | 0.93        | 0.93        | 0.95        |             |         |
|                    |           | [7,7]     | 0.95        | 0.95                   | 0.93        | 0.93        | 0.95        |             |         |
|                    |           | [6,6]     | <b>1.00</b> | <b>1.00</b>            | <b>1.00</b> | <b>1.00</b> | <b>1.00</b> |             |         |
|                    |           | [7,7]     | <b>1.00</b> | <b>1.00</b>            | <b>1.00</b> | <b>1.00</b> | <b>1.00</b> |             |         |
|                    |           | [6,6]     | 0.90        | 0.89                   | 0.88        | 0.88        | 0.91        |             |         |
|                    |           | [7,7]     | 0.90        | 0.90                   | 0.88        | 0.88        | 0.91        |             |         |
|                    | ITGDB     | F1-score  | [6,6]       | 0.94                   | 0.94        | 0.94        | 0.94        | 0.94        |         |
|                    |           |           | [7,7]       | 0.94                   | 0.94        | 0.94        | 0.94        | 0.94        |         |
|                    |           |           | [6,6]       | 0.99                   | 0.99        | 0.99        | 0.99        | 0.99        |         |
|                    |           | Precision | [6,6]       | 0.99                   | 0.99        | 0.99        | 0.99        | 0.99        |         |
|                    |           |           | [7,7]       | 0.99                   | 0.99        | 0.99        | 0.99        | 0.99        |         |
|                    |           |           | [6,6]       | 0.90                   | 0.90        | 0.90        | 0.90        | 0.90        |         |
| RDP                | Recall    | [6,6]     | 0.95        | 0.95                   | 0.95        | <b>1.00</b> | 0.95        |             |         |
|                    |           | [7,7]     | 0.95        | 0.95                   | 0.95        | 0.95        | 0.95        |             |         |
|                    |           | [6,6]     | <b>1.00</b> | <b>1.00</b>            | <b>1.00</b> | <b>1.00</b> | <b>1.00</b> |             |         |
|                    | Precision | [6,6]     | <b>1.00</b> | <b>1.00</b>            | <b>1.00</b> | <b>1.00</b> | <b>1.00</b> |             |         |
|                    |           | [7,7]     | <b>1.00</b> | <b>1.00</b>            | <b>1.00</b> | <b>1.00</b> | <b>1.00</b> |             |         |
|                    |           | [6,6]     | 0.90        | 0.90                   | 0.90        | 0.99        | 0.90        |             |         |
| SILVA              | Recall    | [6,6]     | 0.90        | 0.90                   | 0.90        | 0.90        | 0.90        |             |         |
|                    |           | [7,7]     | 0.90        | 0.90                   | 0.90        | 0.90        | 0.90        |             |         |
|                    |           | [6,6]     | 0.97        | 0.97                   | 0.97        | 0.97        | 0.97        |             |         |
|                    | Precision | [6,6]     | 0.99        | 0.99                   | 0.97        | 0.97        | 0.99        |             |         |
|                    |           | [7,7]     | <b>1.00</b> | <b>1.00</b>            | <b>1.00</b> | <b>1.00</b> | <b>1.00</b> |             |         |
|                    |           | [6,6]     | <b>1.00</b> | <b>1.00</b>            | <b>1.00</b> | <b>1.00</b> | <b>1.00</b> |             |         |
| GSR                | Recall    | [6,6]     | 0.94        | 0.94                   | 0.94        | 0.94        | 0.94        |             |         |
|                    |           | [7,7]     | 0.97        | 0.97                   | 0.94        | 0.94        | 0.97        |             |         |
|                    |           | [6,6]     | 0.92        | 0.89                   | 0.89        | 0.84        | 0.92        |             |         |
|                    | Precision | [6,6]     | 0.92        | 0.92                   | 0.92        | 0.89        | 0.92        |             |         |
|                    |           | [7,7]     | 0.95        | 0.95                   | 0.95        | 0.95        | 0.95        |             |         |
|                    |           | [6,6]     | 0.95        | 0.95                   | 0.95        | 0.95        | 0.95        |             |         |
| GTDB               | Recall    | [6,6]     | 0.90        | 0.84                   | 0.84        | 0.76        | 0.90        |             |         |
|                    |           | [7,7]     | 0.90        | 0.90                   | 0.90        | 0.84        | 0.90        |             |         |
|                    |           | [6,6]     | 0.96        | 0.96                   | 0.94        | 0.94        | 0.96        |             |         |
|                    | Precision | [6,6]     | 0.96        | 0.96                   | 0.96        | 0.96        | 0.96        |             |         |
|                    |           | [7,7]     | 0.97        | 0.97                   | 0.97        | 0.97        | 0.97        |             |         |
|                    |           | [6,6]     | 0.97        | 0.97                   | 0.97        | 0.97        | 0.97        |             |         |
| Greengenes         | Recall    | [6,6]     | 0.95        | 0.95                   | 0.92        | 0.92        | 0.95        |             |         |
|                    |           | [7,7]     | 0.95        | 0.95                   | 0.95        | 0.95        | 0.95        |             |         |
|                    |           | [6,6]     | 0.96        | 0.96                   | 0.96        | 0.95        | 0.97        |             |         |
|                    | Precision | [6,6]     | 0.96        | 0.96                   | 0.96        | 0.96        | 0.97        |             |         |
|                    |           | [7,7]     | <b>1.00</b> | 0.99                   | 0.99        | 0.98        | <b>1.00</b> |             |         |
|                    |           | [6,6]     | <b>1.00</b> | 0.99                   | 0.99        | 0.99        | <b>1.00</b> |             |         |
| ITGDB              | Recall    | [6,6]     | 0.93        | 0.93                   | 0.93        | 0.91        | 0.94        |             |         |
|                    |           | [7,7]     | 0.93        | 0.93                   | 0.93        | 0.93        | 0.94        |             |         |
|                    |           | [6,6]     | 0.97        | 0.97                   | 0.97        | 0.97        | 0.97        |             |         |
|                    | Precision | [6,6]     | 0.97        | 0.97                   | 0.97        | 0.97        | 0.97        |             |         |
|                    |           | [7,7]     | <b>1.00</b> | <b>1.00</b>            | <b>1.00</b> | <b>1.00</b> | <b>1.00</b> |             |         |
|                    |           | [6,6]     | 0.94        | 0.94                   | 0.94        | 0.94        | 0.94        |             |         |
| RDP                | Recall    | [6,6]     | 0.94        | 0.94                   | 0.94        | 0.94        | 0.94        |             |         |
|                    |           | [7,7]     | 0.94        | 0.94                   | 0.94        | 0.94        | 0.94        |             |         |

Continued on next page



Supplementary Table 3: N-gram-range and confidence threshold benchmarking at genus level. F1-score, precision and recall are shown for each database, evaluated region and validation datasets. The values are the average of the five metagenomic samples. Bold represents the highest value.

| Validation Dataset | Region     | Database  | Metrics   | Conf. thres.<br>N-gram | 0.5         | 0.7         | 0.9         | 0.98        | disable     |
|--------------------|------------|-----------|-----------|------------------------|-------------|-------------|-------------|-------------|-------------|
| V3-V5              | V3         | SILVA     | F1-score  | [6,6]                  | <b>1.00</b> | 0.99        | 0.99        | 0.99        | 0.97        |
|                    |            |           |           | [7,7]                  | 0.97        | <b>1.00</b> | 0.99        | 0.99        | 0.97        |
|                    |            |           | Precision | [6,6]                  | <b>1.00</b> | 0.99        | 0.99        | 0.99        | <b>1.00</b> |
|                    |            |           |           | [7,7]                  | <b>1.00</b> | <b>1.00</b> | 0.99        | 0.99        | <b>1.00</b> |
|                    |            |           | Recall    | [6,6]                  | <b>1.00</b> | 0.99        | 0.99        | 0.99        | 0.94        |
|                    |            |           |           | [7,7]                  | 0.94        | <b>1.00</b> | 0.99        | 0.99        | 0.94        |
|                    |            | GSR       | F1-score  | [6,6]                  | 0.99        | 0.98        | 0.98        | 0.98        | 0.99        |
|                    |            |           |           | [7,7]                  | 0.99        | 0.99        | 0.98        | 0.98        | 0.99        |
|                    |            |           | Precision | [6,6]                  | <b>1.00</b> | <b>1.00</b> | <b>1.00</b> | <b>1.00</b> | <b>1.00</b> |
|                    |            |           |           | [7,7]                  | <b>1.00</b> | <b>1.00</b> | <b>1.00</b> | <b>1.00</b> | <b>1.00</b> |
|                    |            |           | Recall    | [6,6]                  | 0.98        | 0.96        | 0.96        | 0.96        | 0.98        |
|                    |            |           |           | [7,7]                  | 0.98        | 0.98        | 0.96        | 0.96        | 0.98        |
|                    | GTDB       | F1-score  | [6,6]     | 0.91                   | 0.91        | 0.88        | 0.86        | 0.91        |             |
|                    |            |           | [7,7]     | 0.91                   | 0.91        | 0.91        | 0.91        | 0.91        |             |
|                    |            | Precision | [6,6]     | 0.93                   | 0.93        | 0.93        | 0.93        | 0.93        |             |
|                    |            |           | [7,7]     | 0.93                   | 0.93        | 0.93        | 0.93        | 0.93        |             |
|                    |            | Recall    | [6,6]     | 0.88                   | 0.88        | 0.84        | 0.79        | 0.88        |             |
|                    |            |           | [7,7]     | 0.88                   | 0.88        | 0.88        | 0.88        | 0.88        |             |
|                    | Greengenes | F1-score  | [6,6]     | 0.95                   | 0.95        | 0.95        | 0.94        | 0.95        |             |
|                    |            |           | [7,7]     | 0.95                   | 0.95        | 0.95        | 0.95        | 0.95        |             |
|                    |            | Precision | [6,6]     | 0.97                   | 0.97        | 0.97        | 0.97        | 0.97        |             |
|                    |            |           | [7,7]     | 0.97                   | 0.97        | 0.97        | 0.97        | 0.97        |             |
|                    |            | Recall    | [6,6]     | 0.94                   | 0.94        | 0.94        | 0.92        | 0.94        |             |
|                    |            |           | [7,7]     | 0.94                   | 0.94        | 0.94        | 0.94        | 0.94        |             |
| V4                 | V4         | ITGDB     | F1-score  | [6,6]                  | 0.97        | 0.96        | 0.95        | 0.94        | 0.98        |
|                    |            |           |           | [7,7]                  | 0.97        | 0.97        | 0.95        | 0.94        | 0.98        |
|                    |            |           | Precision | [6,6]                  | <b>1.00</b> | <b>1.00</b> | <b>1.00</b> | <b>1.00</b> | <b>1.00</b> |
|                    |            | [7,7]     |           | <b>1.00</b>            | <b>1.00</b> | <b>1.00</b> | <b>1.00</b> | <b>1.00</b> |             |
|                    |            | RDP       | Recall    | [6,6]                  | 0.95        | 0.94        | 0.91        | 0.91        | 0.96        |
|                    |            |           |           | [7,7]                  | 0.94        | 0.94        | 0.91        | 0.91        | 0.96        |
| F1-score           | [6,6]      |           | 0.97      | 0.97                   | 0.97        | 0.97        | 0.97        |             |             |
|                    | [7,7]      | 0.97      | 0.97      | 0.97                   | 0.97        | 0.97        |             |             |             |
| V5                 | V5         | SILVA     | F1-score  | [6,6]                  | <b>1.00</b> | 0.99        | 0.99        | 0.99        | <b>1.00</b> |
|                    |            |           |           | [7,7]                  | 0.98        | <b>1.00</b> | 0.99        | 0.99        | 0.98        |
|                    |            |           | Precision | [6,6]                  | <b>1.00</b> | <b>1.00</b> | 0.99        | 0.99        | <b>1.00</b> |
|                    |            | [7,7]     |           | <b>1.00</b>            | <b>1.00</b> | <b>1.00</b> | 0.99        | <b>1.00</b> |             |
|                    |            | GSR       | Recall    | [6,6]                  | <b>1.00</b> | 0.99        | 0.99        | 0.99        | <b>1.00</b> |
|                    |            |           |           | [7,7]                  | 0.95        | <b>1.00</b> | 0.99        | 0.99        | 0.95        |
| F1-score           | [6,6]      |           | 0.96      | 0.96                   | 0.96        | 0.96        | 0.96        |             |             |
|                    | [7,7]      | 0.98      | 0.96      | 0.96                   | 0.96        | 0.98        |             |             |             |
| V6                 | V6         | GSR       | Precision | [6,6]                  | <b>1.00</b> | <b>1.00</b> | <b>1.00</b> | <b>1.00</b> | <b>1.00</b> |
|                    |            |           |           | [7,7]                  | <b>1.00</b> | <b>1.00</b> | <b>1.00</b> | <b>1.00</b> | <b>1.00</b> |
|                    |            |           | Recall    | [6,6]                  | 0.93        | 0.93        | 0.93        | 0.93        | 0.93        |
|                    |            | [7,7]     |           | 0.95                   | 0.93        | 0.93        | 0.93        | 0.95        |             |
|                    |            | GTDB      | F1-score  | [6,6]                  | 0.84        | 0.80        | 0.80        | 0.79        | 0.84        |
|                    |            |           |           | [7,7]                  | 0.87        | 0.84        | 0.79        | 0.79        | 0.90        |
| Precision          | [6,6]      |           | 0.93      | 0.93                   | 0.93        | 0.93        | 0.93        |             |             |
|                    | [7,7]      | 0.93      | 0.93      | 0.93                   | 0.93        | 0.93        |             |             |             |
| Greengenes         | Recall     | [6,6]     | 0.76      | 0.71                   | 0.71        | 0.69        | 0.76        |             |             |
|                    |            | [7,7]     | 0.81      | 0.76                   | 0.69        | 0.69        | 0.86        |             |             |
|                    | F1-score   | [6,6]     | 0.93      | 0.93                   | 0.90        | 0.89        | 0.95        |             |             |
| [7,7]              |            | 0.93      | 0.93      | 0.90                   | 0.90        | 0.95        |             |             |             |
| V7                 | V7         | Precision | [6,6]     | 0.97                   | 0.97        | 0.97        | 0.96        | 0.97        |             |
|                    |            |           | [7,7]     | 0.97                   | 0.97        | 0.97        | 0.96        | 0.97        |             |
|                    |            | Recall    | [6,6]     | 0.91                   | 0.91        | 0.86        | 0.84        | 0.93        |             |
| [7,7]              | 0.91       |           | 0.91      | 0.86                   | 0.85        | 0.93        |             |             |             |
| V8                 | V8         | F1-score  | [6,6]     | 0.96                   | 0.92        | 0.93        | 0.91        | 0.96        |             |
|                    |            |           | [7,7]     | 0.96                   | 0.92        | 0.93        | 0.91        | 0.96        |             |

Continued on next page

Supplementary Table 3: N-gram-range and confidence threshold benchmarking at genus level. F1-score, precision and recall are shown for each database, evaluated region and validation datasets. The values are the average of the five metagenomic samples. Bold represents the highest value.

| Validation Dataset | Region    | Database  | Metrics | Conf. thres.<br>N-gram | 0.5         | 0.7         | 0.9         | 0.98        | disable     |             |
|--------------------|-----------|-----------|---------|------------------------|-------------|-------------|-------------|-------------|-------------|-------------|
| full-16S           | RDP       | Precision | [6,6]   | [7,7]                  | 0.96        | 0.92        | 0.93        | 0.92        | 0.96        |             |
|                    |           |           | [6,6]   | [7,7]                  | <b>1.00</b> | 0.99        | 0.99        | 0.99        | <b>1.00</b> |             |
|                    |           |           | [6,6]   | [7,7]                  | <b>1.00</b> | 0.99        | 0.99        | 0.99        | <b>1.00</b> |             |
|                    |           |           | [6,6]   | [7,7]                  | 0.92        | 0.87        | 0.89        | 0.87        | 0.93        |             |
|                    |           |           | [6,6]   | [7,7]                  | 0.92        | 0.87        | 0.89        | 0.87        | 0.93        |             |
|                    |           |           | [6,6]   | [7,7]                  | 0.93        | 0.93        | 0.90        | 0.87        | 0.96        |             |
|                    |           | Recall    | [6,6]   | [7,7]                  | <b>1.00</b> | <b>1.00</b> | <b>1.00</b> | <b>1.00</b> | <b>1.00</b> | <b>1.00</b> |
|                    |           |           | [6,6]   | [7,7]                  | <b>1.00</b> | <b>1.00</b> | <b>1.00</b> | <b>1.00</b> | <b>1.00</b> |             |
|                    |           |           | [6,6]   | [7,7]                  | 0.88        | 0.88        | 0.83        | 0.77        | 0.93        |             |
|                    |           |           | [6,6]   | [7,7]                  | 0.88        | 0.88        | 0.83        | 0.83        | 0.93        |             |
|                    |           |           | [6,6]   | [7,7]                  | 0.95        | 0.95        | 0.99        | 0.96        | 0.96        |             |
|                    |           |           | [6,6]   | [7,7]                  | 0.95        | 0.95        | 0.99        | 0.94        | 0.96        |             |
|                    | SILVA     | Precision | [6,6]   | [7,7]                  | 0.99        | 0.99        | 0.99        | 0.99        | <b>1.00</b> |             |
|                    |           |           | [6,6]   | [7,7]                  | 0.99        | 0.99        | 0.99        | 0.99        | <b>1.00</b> |             |
|                    |           |           | [6,6]   | [7,7]                  | 0.92        | 0.92        | 0.99        | 0.94        | 0.92        |             |
|                    |           | Recall    | [6,6]   | [7,7]                  | 0.92        | 0.92        | 0.99        | 0.89        | 0.92        |             |
|                    |           |           | [6,6]   | [7,7]                  | 0.98        | 0.98        | 0.98        | 0.98        | 0.98        |             |
|                    |           |           | [6,6]   | [7,7]                  | 0.98        | 0.98        | 0.98        | 0.98        | 0.98        |             |
|                    | GSR       | Precision | [6,6]   | [7,7]                  | <b>1.00</b> | <b>1.00</b> | <b>1.00</b> | <b>1.00</b> | <b>1.00</b> |             |
|                    |           |           | [6,6]   | [7,7]                  | <b>1.00</b> | <b>1.00</b> | <b>1.00</b> | <b>1.00</b> | <b>1.00</b> |             |
|                    |           |           | [6,6]   | [7,7]                  | 0.96        | 0.96        | 0.96        | 0.96        | 0.96        |             |
|                    |           | Recall    | [6,6]   | [7,7]                  | 0.96        | 0.96        | 0.96        | 0.96        | 0.96        |             |
|                    |           |           | [6,6]   | [7,7]                  | 0.89        | 0.89        | 0.87        | 0.84        | 0.89        |             |
|                    |           |           | [6,6]   | [7,7]                  | 0.91        | 0.91        | 0.91        | 0.89        | 0.91        |             |
| GTDB               | Precision | [6,6]     | [7,7]   | 0.92                   | 0.92        | 0.92        | 0.92        | 0.92        |             |             |
|                    |           | [6,6]     | [7,7]   | 0.92                   | 0.92        | 0.92        | 0.92        | 0.92        |             |             |
|                    |           | [6,6]     | [7,7]   | 0.86                   | 0.86        | 0.82        | 0.78        | 0.86        |             |             |
|                    | Recall    | [6,6]     | [7,7]   | 0.89                   | 0.89        | 0.89        | 0.86        | 0.89        |             |             |
|                    |           | [6,6]     | [7,7]   | 0.96                   | 0.96        | 0.95        | 0.94        | 0.96        |             |             |
|                    |           | [6,6]     | [7,7]   | 0.96                   | 0.96        | 0.96        | 0.96        | 0.96        |             |             |
| Greengenes         | Precision | [6,6]     | [7,7]   | <b>1.00</b>            | <b>1.00</b> | 0.97        | 0.97        | <b>1.00</b> |             |             |
|                    |           | [6,6]     | [7,7]   | <b>1.00</b>            | <b>1.00</b> | <b>1.00</b> | <b>1.00</b> | <b>1.00</b> |             |             |
|                    |           | [6,6]     | [7,7]   | 0.94                   | 0.94        | 0.93        | 0.91        | 0.94        |             |             |
|                    | Recall    | [6,6]     | [7,7]   | 0.96                   | 0.96        | 0.96        | 0.96        | 0.96        |             |             |
|                    |           | [6,6]     | [7,7]   | 0.98                   | 0.98        | 0.96        | 0.95        | 0.98        |             |             |
|                    |           | [6,6]     | [7,7]   | 0.98                   | 0.98        | 0.96        | 0.96        | 0.98        |             |             |
| ITGDB              | Precision | [6,6]     | [7,7]   | <b>1.00</b>            | <b>1.00</b> | <b>1.00</b> | <b>1.00</b> | <b>1.00</b> |             |             |
|                    |           | [6,6]     | [7,7]   | <b>1.00</b>            | <b>1.00</b> | <b>1.00</b> | <b>1.00</b> | <b>1.00</b> |             |             |
|                    |           | [6,6]     | [7,7]   | 0.96                   | 0.96        | 0.94        | 0.92        | 0.96        |             |             |
|                    | Recall    | [6,6]     | [7,7]   | 0.96                   | 0.96        | 0.94        | 0.93        | 0.96        |             |             |
|                    |           | [6,6]     | [7,7]   | 0.98                   | 0.98        | 0.98        | 0.98        | 0.98        |             |             |
|                    |           | [6,6]     | [7,7]   | 0.98                   | 0.98        | 0.98        | 0.98        | 0.98        |             |             |
| RDP                | Precision | [6,6]     | [7,7]   | <b>1.00</b>            | <b>1.00</b> | <b>1.00</b> | <b>1.00</b> | <b>1.00</b> |             |             |
|                    |           | [6,6]     | [7,7]   | <b>1.00</b>            | <b>1.00</b> | <b>1.00</b> | <b>1.00</b> | <b>1.00</b> |             |             |
|                    |           | [6,6]     | [7,7]   | 0.96                   | 0.96        | 0.96        | 0.96        | 0.96        |             |             |
|                    | Recall    | [6,6]     | [7,7]   | 0.96                   | 0.96        | 0.96        | 0.96        | 0.96        |             |             |
|                    |           | [6,6]     | [7,7]   | 0.98                   | 0.98        | 0.98        | 0.98        | 0.98        |             |             |
|                    |           | [6,6]     | [7,7]   | 0.98                   | 0.98        | 0.98        | 0.98        | 0.98        |             |             |
| SILVA              | Precision | [6,6]     | [7,7]   | <b>1.00</b>            | <b>1.00</b> | <b>1.00</b> | <b>1.00</b> | <b>1.00</b> |             |             |
|                    |           | [6,6]     | [7,7]   | <b>1.00</b>            | <b>1.00</b> | <b>1.00</b> | <b>1.00</b> | <b>1.00</b> |             |             |
|                    |           | [6,6]     | [7,7]   | 0.96                   | 0.96        | 0.96        | 0.96        | 0.96        |             |             |
|                    | Recall    | [6,6]     | [7,7]   | 0.96                   | 0.96        | 0.96        | 0.96        | 0.96        |             |             |
|                    |           | [6,6]     | [7,7]   | 0.96                   | 0.96        | 0.96        | 0.96        | 0.96        |             |             |
|                    |           | [6,6]     | [7,7]   | 0.96                   | 0.96        | 0.96        | 0.96        | 0.96        |             |             |

Supplementary Table 4: N-gram-range and confidence threshold benchmarking at species level. F1-score, precision and recall are shown for each database, evaluated region and validation datasets. The values are the average of the five metagenomic samples. Bold represents the highest value.

| Validation Dataset | Region     | Database  | Metrics   | Conf. thres.<br>N-gram | <b>0.5</b> | <b>0.7</b> | <b>0.9</b> | <b>0.98</b> | <b>disable</b> |
|--------------------|------------|-----------|-----------|------------------------|------------|------------|------------|-------------|----------------|
| V1-V3              | GSR        | F1-score  | [6,6]     | 0.96                   | 0.95       | 0.93       | 0.93       | 0.96        |                |
|                    |            |           | [7,7]     | 0.99                   | 0.98       | 0.94       | 0.94       | 0.99        |                |
|                    |            |           | Precision | [6,6]                  | 0.96       | 0.97       | 0.95       | 0.94        | 0.96           |
|                    |            |           |           | [7,7]                  | 0.99       | 0.99       | 0.96       | 0.95        | 0.99           |
|                    |            |           | Recall    | [6,6]                  | 0.95       | 0.95       | 0.93       | 0.92        | 0.95           |
|                    |            |           |           | [7,7]                  | 0.98       | 0.98       | 0.94       | 0.93        | 0.98           |
|                    |            | GTDB      | F1-score  | [6,6]                  | 0.80       | 0.74       | 0.69       | 0.60        | 0.81           |
|                    |            |           |           | [7,7]                  | 0.80       | 0.77       | 0.71       | 0.63        | 0.80           |
|                    |            |           | Precision | [6,6]                  | 0.85       | 0.83       | 0.75       | 0.71        | 0.85           |
|                    |            |           |           | [7,7]                  | 0.85       | 0.84       | 0.82       | 0.74        | 0.85           |
|                    |            |           | Recall    | [6,6]                  | 0.79       | 0.72       | 0.66       | 0.57        | 0.80           |
|                    |            |           |           | [7,7]                  | 0.77       | 0.74       | 0.68       | 0.60        | 0.78           |
|                    | Greengenes | F1-score  | [6,6]     | 0.56                   | 0.55       | 0.53       | 0.51       | 0.57        |                |
|                    |            |           | [7,7]     | 0.57                   | 0.56       | 0.55       | 0.53       | 0.57        |                |
|                    |            | Precision | [6,6]     | 0.59                   | 0.59       | 0.58       | 0.58       | 0.59        |                |
|                    |            |           | [7,7]     | 0.60                   | 0.60       | 0.59       | 0.58       | 0.60        |                |
|                    |            | Recall    | [6,6]     | 0.55                   | 0.53       | 0.52       | 0.50       | 0.55        |                |
|                    |            |           | [7,7]     | 0.55                   | 0.54       | 0.53       | 0.51       | 0.56        |                |
|                    | ITGDB      | F1-score  | [6,6]     | 0.76                   | 0.75       | 0.70       | 0.65       | 0.85        |                |
|                    |            |           | [7,7]     | 0.76                   | 0.75       | 0.71       | 0.65       | 0.88        |                |
|                    |            | Precision | [6,6]     | 0.77                   | 0.76       | 0.76       | 0.74       | 0.86        |                |
|                    |            |           | [7,7]     | 0.77                   | 0.77       | 0.76       | 0.74       | 0.88        |                |
|                    |            | Recall    | [6,6]     | 0.77                   | 0.74       | 0.68       | 0.62       | 0.86        |                |
|                    |            |           | [7,7]     | 0.77                   | 0.73       | 0.68       | 0.62       | 0.88        |                |
| RDP                | F1-score   | [6,6]     | 0.60      | 0.60                   | 0.61       | 0.61       | 0.59       |             |                |
|                    |            | [7,7]     | 0.59      | 0.60                   | 0.61       | 0.61       | 0.59       |             |                |
|                    | Precision  | [6,6]     | 0.60      | 0.60                   | 0.61       | 0.62       | 0.59       |             |                |
|                    |            | [7,7]     | 0.59      | 0.60                   | 0.61       | 0.61       | 0.59       |             |                |
|                    | Recall     | [6,6]     | 0.61      | 0.61                   | 0.61       | 0.60       | 0.61       |             |                |
|                    |            | [7,7]     | 0.61      | 0.61                   | 0.61       | 0.60       | 0.61       |             |                |
| SILVA              | F1-score   | [6,6]     | 0.65      | 0.60                   | 0.54       | 0.44       | 0.72       |             |                |
|                    |            | [7,7]     | 0.71      | 0.66                   | 0.57       | 0.54       | 0.74       |             |                |
|                    | Precision  | [6,6]     | 0.77      | 0.75                   | 0.66       | 0.50       | 0.82       |             |                |
|                    |            | [7,7]     | 0.83      | 0.79                   | 0.72       | 0.60       | 0.83       |             |                |
|                    | Recall     | [6,6]     | 0.63      | 0.58                   | 0.53       | 0.42       | 0.70       |             |                |
|                    |            | [7,7]     | 0.69      | 0.64                   | 0.56       | 0.52       | 0.71       |             |                |
| V3-V4              | GSR        | F1-score  | [6,6]     | 0.89                   | 0.85       | 0.79       | 0.74       | 0.93        |                |
|                    |            |           | [7,7]     | 0.89                   | 0.86       | 0.85       | 0.79       | 0.99        |                |
|                    |            | Precision | [6,6]     | 0.90                   | 0.86       | 0.81       | 0.76       | 0.94        |                |
|                    |            |           | [7,7]     | 0.89                   | 0.87       | 0.86       | 0.81       | 0.99        |                |
|                    |            | Recall    | [6,6]     | 0.89                   | 0.85       | 0.79       | 0.74       | 0.92        |                |
|                    |            |           | [7,7]     | 0.88                   | 0.85       | 0.85       | 0.79       | 0.98        |                |
|                    | GTDB       | F1-score  | [6,6]     | 0.72                   | 0.61       | 0.52       | 0.34       | 0.76        |                |
|                    |            |           | [7,7]     | 0.71                   | 0.64       | 0.53       | 0.35       | 0.75        |                |
|                    |            | Precision | [6,6]     | 0.74                   | 0.67       | 0.61       | 0.39       | 0.78        |                |
|                    |            |           | [7,7]     | 0.75                   | 0.70       | 0.63       | 0.37       | 0.78        |                |
|                    |            | Recall    | [6,6]     | 0.71                   | 0.60       | 0.50       | 0.33       | 0.76        |                |
|                    |            |           | [7,7]     | 0.70                   | 0.63       | 0.52       | 0.34       | 0.74        |                |
| Greengenes         | F1-score   | [6,6]     | 0.52      | 0.42                   | 0.40       | 0.31       | 0.53       |             |                |
|                    |            | [7,7]     | 0.54      | 0.46                   | 0.43       | 0.35       | 0.55       |             |                |
|                    | Precision  | [6,6]     | 0.53      | 0.45                   | 0.43       | 0.34       | 0.54       |             |                |
|                    |            | [7,7]     | 0.55      | 0.49                   | 0.47       | 0.41       | 0.56       |             |                |
|                    | Recall     | [6,6]     | 0.52      | 0.42                   | 0.39       | 0.30       | 0.52       |             |                |
|                    |            | [7,7]     | 0.53      | 0.45                   | 0.42       | 0.34       | 0.54       |             |                |
| ITGDB              | F1-score   | [6,6]     | 0.66      | 0.63                   | 0.50       | 0.42       | 0.86       |             |                |
|                    |            | [7,7]     | 0.69      | 0.64                   | 0.51       | 0.44       | 0.92       |             |                |
|                    | Precision  | [6,6]     | 0.67      | 0.65                   | 0.53       | 0.46       | 0.87       |             |                |
|                    |            | [7,7]     | 0.70      | 0.66                   | 0.54       | 0.48       | 0.92       |             |                |
|                    | Recall     | [6,6]     | 0.65      | 0.62                   | 0.48       | 0.41       | 0.86       |             |                |
|                    |            | [7,7]     | 0.69      | 0.63                   | 0.50       | 0.43       | 0.91       |             |                |

Continued on next page

Supplementary Table 4: Supplementary table 4. N-gram-range and confidence threshold benchmarking at species level. F1-score, precision and recall are shown for each database, evaluated region and validation datasets. The values are the average of the five metagenomic samples. Bold represents the highest value.

| Validation Dataset | Region    | Database  | Metrics | Conf. thres.<br>N-gram | <b>0.5</b> | <b>0.7</b> | <b>0.9</b> | <b>0.98</b> | <b>disable</b> |
|--------------------|-----------|-----------|---------|------------------------|------------|------------|------------|-------------|----------------|
| V3-V5              | RDP       | F1-score  | [6,6]   | 0.80                   | 0.73       | 0.61       | 0.51       | 0.88        |                |
|                    |           |           | [7,7]   | 0.74                   | 0.70       | 0.62       | 0.59       | 0.82        |                |
|                    |           | Precision | [6,6]   | 0.88                   | 0.81       | 0.62       | 0.53       | 0.89        |                |
|                    |           |           | [7,7]   | 0.82                   | 0.78       | 0.64       | 0.60       | 0.87        |                |
|                    |           | Recall    | [6,6]   | 0.78                   | 0.70       | 0.60       | 0.51       | 0.88        |                |
|                    |           |           | [7,7]   | 0.71                   | 0.68       | 0.62       | 0.58       | 0.81        |                |
|                    | SILVA     | F1-score  | [6,6]   | 0.37                   | 0.34       | 0.28       | 0.15       | 0.47        |                |
|                    |           |           | [7,7]   | 0.42                   | 0.38       | 0.34       | 0.30       | 0.50        |                |
|                    |           | Precision | [6,6]   | 0.40                   | 0.35       | 0.30       | 0.20       | 0.52        |                |
|                    |           |           | [7,7]   | 0.47                   | 0.40       | 0.36       | 0.32       | 0.56        |                |
|                    |           | Recall    | [6,6]   | 0.36                   | 0.33       | 0.27       | 0.12       | 0.44        |                |
|                    |           |           | [7,7]   | 0.40                   | 0.37       | 0.34       | 0.29       | 0.47        |                |
|                    | GSR       | F1-score  | [6,6]   | 0.94                   | 0.92       | 0.89       | 0.82       | 0.94        |                |
|                    |           |           | [7,7]   | 0.95                   | 0.95       | 0.93       | 0.87       | 0.95        |                |
|                    |           | Precision | [6,6]   | 0.95                   | 0.94       | 0.91       | 0.86       | 0.95        |                |
|                    |           |           | [7,7]   | 0.96                   | 0.96       | 0.95       | 0.91       | 0.96        |                |
|                    |           | Recall    | [6,6]   | 0.94                   | 0.92       | 0.89       | 0.80       | 0.94        |                |
|                    |           |           | [7,7]   | 0.95                   | 0.94       | 0.92       | 0.85       | 0.95        |                |
|                    | GTDB      | F1-score  | [6,6]   | 0.68                   | 0.56       | 0.47       | 0.38       | 0.74        |                |
|                    |           |           | [7,7]   | 0.63                   | 0.56       | 0.51       | 0.41       | 0.69        |                |
|                    |           | Precision | [6,6]   | 0.73                   | 0.66       | 0.59       | 0.46       | 0.78        |                |
|                    |           |           | [7,7]   | 0.69                   | 0.67       | 0.61       | 0.53       | 0.72        |                |
|                    |           | Recall    | [6,6]   | 0.66                   | 0.54       | 0.46       | 0.36       | 0.73        |                |
|                    |           |           | [7,7]   | 0.61                   | 0.54       | 0.49       | 0.39       | 0.68        |                |
| Greengenes         | F1-score  | [6,6]     | 0.53    | 0.48                   | 0.42       | 0.36       | 0.54       |             |                |
|                    |           | [7,7]     | 0.55    | 0.52                   | 0.45       | 0.41       | 0.56       |             |                |
|                    | Precision | [6,6]     | 0.55    | 0.53                   | 0.48       | 0.45       | 0.56       |             |                |
|                    |           | [7,7]     | 0.57    | 0.55                   | 0.50       | 0.48       | 0.58       |             |                |
|                    | Recall    | [6,6]     | 0.52    | 0.46                   | 0.40       | 0.33       | 0.53       |             |                |
|                    |           | [7,7]     | 0.54    | 0.50                   | 0.44       | 0.39       | 0.55       |             |                |
| ITGDB              | F1-score  | [6,6]     | 0.72    | 0.68                   | 0.57       | 0.48       | 0.86       |             |                |
|                    |           | [7,7]     | 0.73    | 0.70                   | 0.61       | 0.51       | 0.87       |             |                |
|                    | Precision | [6,6]     | 0.73    | 0.72                   | 0.63       | 0.57       | 0.87       |             |                |
|                    |           | [7,7]     | 0.74    | 0.72                   | 0.70       | 0.62       | 0.88       |             |                |
|                    | Recall    | [6,6]     | 0.71    | 0.66                   | 0.55       | 0.45       | 0.86       |             |                |
|                    |           | [7,7]     | 0.72    | 0.68                   | 0.58       | 0.47       | 0.87       |             |                |
| RDP                | F1-score  | [6,6]     | 0.74    | 0.73                   | 0.67       | 0.60       | 0.77       |             |                |
|                    |           | [7,7]     | 0.73    | 0.74                   | 0.69       | 0.67       | 0.77       |             |                |
|                    | Precision | [6,6]     | 0.84    | 0.83                   | 0.70       | 0.62       | 0.83       |             |                |
|                    |           | [7,7]     | 0.82    | 0.84                   | 0.71       | 0.70       | 0.83       |             |                |
|                    | Recall    | [6,6]     | 0.72    | 0.71                   | 0.66       | 0.59       | 0.76       |             |                |
|                    |           | [7,7]     | 0.72    | 0.72                   | 0.68       | 0.66       | 0.76       |             |                |
| SILVA              | F1-score  | [6,6]     | 0.44    | 0.37                   | 0.30       | 0.21       | 0.56       |             |                |
|                    |           | [7,7]     | 0.56    | 0.47                   | 0.38       | 0.32       | 0.62       |             |                |
|                    | Precision | [6,6]     | 0.59    | 0.49                   | 0.39       | 0.28       | 0.71       |             |                |
|                    |           | [7,7]     | 0.71    | 0.60                   | 0.51       | 0.39       | 0.74       |             |                |
|                    | Recall    | [6,6]     | 0.41    | 0.35                   | 0.29       | 0.19       | 0.53       |             |                |
|                    |           | [7,7]     | 0.52    | 0.45                   | 0.36       | 0.31       | 0.59       |             |                |
| GSR                | F1-score  | [6,6]     | 0.91    | 0.85                   | 0.76       | 0.64       | 0.91       |             |                |
|                    |           | [7,7]     | 0.91    | 0.89                   | 0.79       | 0.72       | 0.92       |             |                |
|                    | Precision | [6,6]     | 0.91    | 0.86                   | 0.78       | 0.70       | 0.91       |             |                |
|                    |           | [7,7]     | 0.92    | 0.90                   | 0.80       | 0.75       | 0.93       |             |                |
|                    | Recall    | [6,6]     | 0.91    | 0.85                   | 0.76       | 0.61       | 0.91       |             |                |
|                    |           | [7,7]     | 0.91    | 0.89                   | 0.78       | 0.70       | 0.92       |             |                |
| GTDB               | F1-score  | [6,6]     | 0.61    | 0.52                   | 0.33       | 0.16       | 0.70       |             |                |
|                    |           | [7,7]     | 0.58    | 0.53                   | 0.35       | 0.23       | 0.68       |             |                |
|                    | Precision | [6,6]     | 0.68    | 0.61                   | 0.42       | 0.22       | 0.72       |             |                |
|                    |           | [7,7]     | 0.66    | 0.62                   | 0.43       | 0.31       | 0.70       |             |                |
|                    | Recall    | [6,6]     | 0.59    | 0.50                   | 0.32       | 0.14       | 0.69       |             |                |
|                    |           | [7,7]     | 0.56    | 0.51                   | 0.33       | 0.21       | 0.68       |             |                |
| F1-score           | [6,6]     | 0.50      | 0.44    | 0.38                   | 0.30       | 0.53       |            |             |                |

Continued on next page

Supplementary Table 4: Supplementary table 4. N-gram-range and confidence threshold benchmarking at species level. F1-score, precision and recall are shown for each database, evaluated region and validation datasets. The values are the average of the five metagenomic samples. Bold represents the highest value.

| Validation Dataset | Region   | Database  | Metrics | Conf. thres.<br>N-gram | 0.5  | 0.7  | 0.9  | 0.98 | disable |
|--------------------|----------|-----------|---------|------------------------|------|------|------|------|---------|
| full-16S           | ITGDB    | Precision | [6,6]   | [7,7]                  | 0.51 | 0.45 | 0.42 | 0.33 | 0.54    |
|                    |          |           | [6,6]   | [7,7]                  | 0.53 | 0.48 | 0.40 | 0.35 | 0.55    |
|                    |          |           | [6,6]   | [7,7]                  | 0.54 | 0.49 | 0.44 | 0.37 | 0.56    |
|                    |          | Recall    | [6,6]   | [7,7]                  | 0.49 | 0.44 | 0.37 | 0.28 | 0.52    |
|                    |          |           | [6,6]   | [7,7]                  | 0.51 | 0.44 | 0.41 | 0.32 | 0.53    |
|                    |          |           | [6,6]   | [7,7]                  | 0.61 | 0.57 | 0.44 | 0.29 | 0.84    |
|                    |          | F1-score  | [6,6]   | [7,7]                  | 0.61 | 0.57 | 0.45 | 0.35 | 0.84    |
|                    |          |           | [6,6]   | [7,7]                  | 0.62 | 0.59 | 0.49 | 0.41 | 0.85    |
|                    |          |           | [6,6]   | [7,7]                  | 0.61 | 0.60 | 0.49 | 0.46 | 0.86    |
|                    |          | Recall    | [6,6]   | [7,7]                  | 0.61 | 0.55 | 0.43 | 0.26 | 0.83    |
|                    |          |           | [6,6]   | [7,7]                  | 0.60 | 0.56 | 0.43 | 0.31 | 0.84    |
|                    |          |           | [6,6]   | [7,7]                  | 0.85 | 0.72 | 0.56 | 0.50 | 0.87    |
|                    | RDP      | F1-score  | [6,6]   | [7,7]                  | 0.85 | 0.84 | 0.58 | 0.52 | 0.87    |
|                    |          |           | [6,6]   | [7,7]                  | 0.85 | 0.79 | 0.57 | 0.51 | 0.88    |
|                    |          |           | [6,6]   | [7,7]                  | 0.86 | 0.85 | 0.59 | 0.53 | 0.88    |
|                    | Recall   | [6,6]     | [7,7]   | 0.84                   | 0.70 | 0.56 | 0.49 | 0.87 |         |
|                    |          | [6,6]     | [7,7]   | 0.85                   | 0.84 | 0.58 | 0.51 | 0.87 |         |
|                    |          | [6,6]     | [7,7]   | 0.34                   | 0.27 | 0.13 | 0.05 | 0.44 |         |
|                    | SILVA    | F1-score  | [6,6]   | [7,7]                  | 0.40 | 0.34 | 0.23 | 0.09 | 0.49    |
|                    |          |           | [6,6]   | [7,7]                  | 0.38 | 0.29 | 0.20 | 0.06 | 0.50    |
|                    |          |           | [6,6]   | [7,7]                  | 0.46 | 0.37 | 0.27 | 0.10 | 0.57    |
|                    | Recall   | [6,6]     | [7,7]   | 0.32                   | 0.26 | 0.11 | 0.05 | 0.43 |         |
|                    |          | [6,6]     | [7,7]   | 0.38                   | 0.33 | 0.21 | 0.08 | 0.46 |         |
|                    |          | [6,6]     | [7,7]   | 0.99                   | 0.99 | 0.98 | 0.94 | 0.99 |         |
|                    | GSR      | F1-score  | [6,6]   | [7,7]                  | 1.00 | 1.00 | 0.99 | 0.98 | 1.00    |
|                    |          |           | [6,6]   | [7,7]                  | 1.00 | 1.00 | 0.98 | 0.95 | 0.99    |
|                    |          |           | [6,6]   | [7,7]                  | 1.00 | 1.00 | 1.00 | 0.99 | 1.00    |
|                    | Recall   | [6,6]     | [7,7]   | 0.99                   | 0.98 | 0.97 | 0.93 | 0.99 |         |
|                    |          | [6,6]     | [7,7]   | 0.99                   | 0.99 | 0.99 | 0.97 | 0.99 |         |
|                    |          | [6,6]     | [7,7]   | 0.52                   | 0.36 | 0.30 | 0.21 | 0.58 |         |
| GTDB               | F1-score | [6,6]     | [7,7]   | 0.47                   | 0.44 | 0.40 | 0.36 | 0.47 |         |
|                    |          | [6,6]     | [7,7]   | 0.59                   | 0.44 | 0.37 | 0.29 | 0.65 |         |
|                    |          | [6,6]     | [7,7]   | 0.55                   | 0.53 | 0.48 | 0.45 | 0.55 |         |
| Recall             | [6,6]    | [7,7]     | 0.48    | 0.34                   | 0.29 | 0.20 | 0.55 |      |         |
|                    | [6,6]    | [7,7]     | 0.45    | 0.42                   | 0.38 | 0.35 | 0.45 |      |         |
|                    | [6,6]    | [7,7]     | 0.55    | 0.52                   | 0.48 | 0.43 | 0.56 |      |         |
| Greengenes         | F1-score | [6,6]     | [7,7]   | 0.56                   | 0.55 | 0.53 | 0.50 | 0.57 |         |
|                    |          | [6,6]     | [7,7]   | 0.59                   | 0.58 | 0.56 | 0.48 | 0.59 |         |
|                    |          | [6,6]     | [7,7]   | 0.60                   | 0.60 | 0.59 | 0.57 | 0.60 |         |
| Recall             | [6,6]    | [7,7]     | 0.53    | 0.50                   | 0.47 | 0.41 | 0.54 |      |         |
|                    | [6,6]    | [7,7]     | 0.55    | 0.53                   | 0.51 | 0.48 | 0.55 |      |         |
|                    | [6,6]    | [7,7]     | 0.84    | 0.80                   | 0.70 | 0.55 | 0.91 |      |         |
| ITGDB              | F1-score | [6,6]     | [7,7]   | 0.84                   | 0.81 | 0.72 | 0.63 | 0.91 |         |
|                    |          | [6,6]     | [7,7]   | 0.84                   | 0.84 | 0.80 | 0.67 | 0.91 |         |
|                    |          | [6,6]     | [7,7]   | 0.84                   | 0.84 | 0.82 | 0.76 | 0.91 |         |
| Recall             | [6,6]    | [7,7]     | 0.84    | 0.78                   | 0.66 | 0.51 | 0.91 |      |         |
|                    | [6,6]    | [7,7]     | 0.84    | 0.80                   | 0.67 | 0.58 | 0.91 |      |         |
|                    | [6,6]    | [7,7]     | 0.87    | 0.87                   | 0.84 | 0.75 | 0.88 |      |         |
| RDP                | F1-score | [6,6]     | [7,7]   | 0.88                   | 0.88 | 0.87 | 0.84 | 0.88 |         |
|                    |          | [6,6]     | [7,7]   | 0.88                   | 0.88 | 0.88 | 0.87 | 0.88 |         |
|                    |          | [6,6]     | [7,7]   | 0.89                   | 0.89 | 0.88 | 0.88 | 0.89 |         |
| Recall             | [6,6]    | [7,7]     | 0.87    | 0.87                   | 0.81 | 0.71 | 0.88 |      |         |
|                    | [6,6]    | [7,7]     | 0.88    | 0.88                   | 0.87 | 0.81 | 0.88 |      |         |
|                    | [6,6]    | [7,7]     | 0.71    | 0.68                   | 0.54 | 0.35 | 0.73 |      |         |
| SILVA              | F1-score | [6,6]     | [7,7]   | 0.76                   | 0.74 | 0.71 | 0.66 | 0.77 |         |
|                    |          | [6,6]     | [7,7]   | 0.87                   | 0.85 | 0.73 | 0.45 | 0.88 |         |
|                    |          | [6,6]     | [7,7]   | 0.90                   | 0.89 | 0.88 | 0.84 | 0.90 |         |
| Recall             | [6,6]    | [7,7]     | 0.69    | 0.66                   | 0.50 | 0.33 | 0.71 |      |         |
|                    | [6,6]    | [7,7]     | 0.74    | 0.72                   | 0.69 | 0.62 | 0.74 |      |         |
|                    | [6,6]    | [7,7]     | 0.85    | 0.82                   | 0.76 | 0.62 | 0.87 |      |         |
| GSR                | F1-score | [6,6]     | [7,7]   | 0.85                   | 0.84 | 0.79 | 0.68 | 0.87 |         |
|                    |          | [6,6]     | [7,7]   | 0.85                   | 0.84 | 0.79 | 0.68 | 0.87 |         |

Continued on next page

Supplementary Table 4: Supplementary table 4. N-gram-range and confidence threshold benchmarking at species level. F1-score, precision and recall are shown for each database, evaluated region and validation datasets. The values are the average of the five metagenomic samples. Bold represents the highest value.

| Validation Dataset | Region     | Database  | Metrics    | Conf. thres.<br>N-gram | 0.5   | 0.7  | 0.9  | 0.98 | disable |      |
|--------------------|------------|-----------|------------|------------------------|-------|------|------|------|---------|------|
|                    |            |           | Precision  | [6,6]                  | 0.85  | 0.83 | 0.79 | 0.67 | 0.91    |      |
|                    |            |           |            | [7,7]                  | 0.85  | 0.85 | 0.81 | 0.73 | 0.91    |      |
|                    |            |           | Recall     | [6,6]                  | 0.84  | 0.81 | 0.74 | 0.60 | 0.86    |      |
|                    |            |           |            | [7,7]                  | 0.84  | 0.84 | 0.78 | 0.66 | 0.86    |      |
|                    |            |           | GTDB       | F1-score               | [6,6] | 0.78 | 0.69 | 0.58 | 0.45    | 0.82 |
|                    |            |           |            |                        | [7,7] | 0.79 | 0.71 | 0.62 | 0.53    | 0.81 |
|                    |            |           |            | Precision              | [6,6] | 0.85 | 0.76 | 0.66 | 0.48    | 0.87 |
|                    |            |           |            |                        | [7,7] | 0.86 | 0.78 | 0.69 | 0.57    | 0.87 |
|                    |            |           |            | Recall                 | [6,6] | 0.76 | 0.67 | 0.55 | 0.44    | 0.81 |
|                    |            |           |            |                        | [7,7] | 0.77 | 0.69 | 0.59 | 0.51    | 0.79 |
|                    |            |           | Greengenes | F1-score               | [6,6] | 0.49 | 0.47 | 0.42 | 0.40    | 0.50 |
|                    |            |           |            |                        | [7,7] | 0.51 | 0.49 | 0.44 | 0.41    | 0.51 |
|                    |            |           |            | Precision              | [6,6] | 0.53 | 0.52 | 0.44 | 0.42    | 0.54 |
|                    |            |           |            |                        | [7,7] | 0.54 | 0.53 | 0.48 | 0.44    | 0.54 |
|                    |            |           |            | Recall                 | [6,6] | 0.48 | 0.46 | 0.41 | 0.39    | 0.49 |
|                    |            |           |            |                        | [7,7] | 0.50 | 0.47 | 0.43 | 0.41    | 0.50 |
|                    |            |           | ITGDB      | F1-score               | [6,6] | 0.72 | 0.66 | 0.49 | 0.31    | 0.78 |
|                    |            |           |            |                        | [7,7] | 0.72 | 0.67 | 0.52 | 0.34    | 0.78 |
|                    |            |           |            | Precision              | [6,6] | 0.73 | 0.70 | 0.54 | 0.33    | 0.82 |
|                    |            |           |            |                        | [7,7] | 0.73 | 0.70 | 0.56 | 0.38    | 0.81 |
|                    |            |           |            | Recall                 | [6,6] | 0.71 | 0.65 | 0.46 | 0.30    | 0.77 |
|                    |            |           |            |                        | [7,7] | 0.72 | 0.66 | 0.50 | 0.33    | 0.78 |
|                    |            |           | RDP        | F1-score               | [6,6] | 0.65 | 0.62 | 0.61 | 0.48    | 0.65 |
|                    |            |           |            |                        | [7,7] | 0.65 | 0.64 | 0.62 | 0.52    | 0.65 |
| Precision          | [6,6]      | 0.69      |            | 0.68                   | 0.66  | 0.59 | 0.69 |      |         |      |
|                    | [7,7]      | 0.69      |            | 0.69                   | 0.67  | 0.62 | 0.69 |      |         |      |
| Recall             | [6,6]      | 0.63      |            | 0.60                   | 0.58  | 0.45 | 0.63 |      |         |      |
|                    | [7,7]      | 0.63      |            | 0.63                   | 0.59  | 0.49 | 0.64 |      |         |      |
| SILVA              | F1-score   | [6,6]     | 0.82       | 0.76                   | 0.60  | 0.38 | 0.85 |      |         |      |
|                    |            | [7,7]     | 0.83       | 0.80                   | 0.71  | 0.55 | 0.85 |      |         |      |
|                    | Precision  | [6,6]     | 0.83       | 0.78                   | 0.65  | 0.46 | 0.89 |      |         |      |
|                    |            | [7,7]     | 0.83       | 0.81                   | 0.77  | 0.60 | 0.88 |      |         |      |
|                    | Recall     | [6,6]     | 0.81       | 0.75                   | 0.58  | 0.36 | 0.84 |      |         |      |
|                    |            | [7,7]     | 0.82       | 0.79                   | 0.68  | 0.53 | 0.84 |      |         |      |
| V3-V4              | GSR        | F1-score  | [6,6]      | 0.75                   | 0.71  | 0.58 | 0.35 | 0.89 |         |      |
|                    |            |           | [7,7]      | 0.75                   | 0.71  | 0.60 | 0.40 | 0.84 |         |      |
|                    |            | Precision | [6,6]      | 0.75                   | 0.71  | 0.58 | 0.35 | 0.89 |         |      |
|                    |            |           | [7,7]      | 0.75                   | 0.71  | 0.60 | 0.40 | 0.84 |         |      |
|                    |            | Recall    | [6,6]      | 0.75                   | 0.71  | 0.58 | 0.35 | 0.89 |         |      |
|                    |            |           | [7,7]      | 0.75                   | 0.71  | 0.60 | 0.40 | 0.84 |         |      |
|                    | GTDB       | F1-score  | [6,6]      | 0.66                   | 0.64  | 0.24 | 0.15 | 0.75 |         |      |
|                    |            |           | [7,7]      | 0.66                   | 0.64  | 0.43 | 0.19 | 0.75 |         |      |
|                    |            | Precision | [6,6]      | 0.66                   | 0.64  | 0.24 | 0.15 | 0.75 |         |      |
|                    |            |           | [7,7]      | 0.66                   | 0.64  | 0.43 | 0.19 | 0.75 |         |      |
|                    | Greengenes | F1-score  | [6,6]      | 0.45                   | 0.42  | 0.27 | 0.26 | 0.59 |         |      |
|                    |            |           | [7,7]      | 0.48                   | 0.42  | 0.31 | 0.26 | 0.60 |         |      |
| Precision          |            | [6,6]     | 0.45       | 0.42                   | 0.27  | 0.26 | 0.59 |      |         |      |
|                    |            | [7,7]     | 0.48       | 0.42                   | 0.31  | 0.26 | 0.60 |      |         |      |
| Recall             |            | [6,6]     | 0.45       | 0.42                   | 0.27  | 0.26 | 0.59 |      |         |      |
|                    |            | [7,7]     | 0.48       | 0.42                   | 0.31  | 0.26 | 0.60 |      |         |      |
| ITGDB              | F1-score   | [6,6]     | 0.71       | 0.56                   | 0.33  | 0.13 | 0.94 |      |         |      |
|                    |            | [7,7]     | 0.71       | 0.60                   | 0.33  | 0.22 | 0.86 |      |         |      |
|                    | Precision  | [6,6]     | 0.71       | 0.56                   | 0.33  | 0.13 | 0.94 |      |         |      |
|                    |            | [7,7]     | 0.71       | 0.60                   | 0.33  | 0.22 | 0.86 |      |         |      |
|                    | Recall     | [6,6]     | 0.71       | 0.56                   | 0.33  | 0.13 | 0.94 |      |         |      |
|                    |            | [7,7]     | 0.71       | 0.60                   | 0.33  | 0.22 | 0.86 |      |         |      |
| RDP                | F1-score   | [6,6]     | 0.43       | 0.43                   | 0.26  | 0.17 | 0.51 |      |         |      |
|                    |            | [7,7]     | 0.43       | 0.43                   | 0.37  | 0.22 | 0.51 |      |         |      |
|                    | Precision  | [6,6]     | 0.43       | 0.43                   | 0.26  | 0.17 | 0.51 |      |         |      |

Continued on next page

Supplementary Table 4: Supplementary table 4. N-gram-range and confidence threshold benchmarking at species level. F1-score, precision and recall are shown for each database, evaluated region and validation datasets. The values are the average of the five metagenomic samples. Bold represents the highest value.

| Validation Dataset | Region     | Database  | Metrics   | Conf. thres.<br>N-gram | 0.5  | 0.7  | 0.9  | 0.98 | disable |
|--------------------|------------|-----------|-----------|------------------------|------|------|------|------|---------|
| V3-V5              | V3         | SILVA     | Recall    | [7,7]                  | 0.43 | 0.43 | 0.37 | 0.22 | 0.51    |
|                    |            |           |           | [6,6]                  | 0.43 | 0.43 | 0.26 | 0.17 | 0.51    |
|                    |            |           |           | [7,7]                  | 0.43 | 0.43 | 0.37 | 0.22 | 0.51    |
|                    |            |           | F1-score  | [6,6]                  | 0.68 | 0.41 | 0.24 | 0.07 | 0.88    |
|                    |            |           |           | [7,7]                  | 0.68 | 0.63 | 0.36 | 0.21 | 0.75    |
|                    |            |           |           | [6,6]                  | 0.68 | 0.41 | 0.24 | 0.07 | 0.88    |
|                    |            | Precision | [7,7]     | 0.68                   | 0.63 | 0.36 | 0.21 | 0.75 |         |
|                    |            |           | [6,6]     | 0.68                   | 0.41 | 0.24 | 0.07 | 0.88 |         |
|                    |            |           | [7,7]     | 0.68                   | 0.63 | 0.36 | 0.21 | 0.75 |         |
|                    |            | Recall    | [6,6]     | 0.68                   | 0.41 | 0.24 | 0.07 | 0.88 |         |
|                    |            |           | [7,7]     | 0.68                   | 0.63 | 0.36 | 0.21 | 0.75 |         |
|                    |            |           | [6,6]     | 0.66                   | 0.59 | 0.53 | 0.35 | 0.77 |         |
|                    |            | GSR       | F1-score  | [7,7]                  | 0.67 | 0.64 | 0.56 | 0.40 | 0.78    |
|                    |            |           |           | [6,6]                  | 0.66 | 0.60 | 0.55 | 0.37 | 0.80    |
|                    |            |           |           | [7,7]                  | 0.67 | 0.64 | 0.57 | 0.42 | 0.81    |
|                    |            |           | Precision | [6,6]                  | 0.67 | 0.60 | 0.52 | 0.35 | 0.78    |
|                    |            |           |           | [7,7]                  | 0.69 | 0.65 | 0.57 | 0.40 | 0.79    |
|                    |            |           |           | [6,6]                  | 0.59 | 0.47 | 0.35 | 0.19 | 0.66    |
|                    |            | GTDB      | F1-score  | [7,7]                  | 0.59 | 0.49 | 0.39 | 0.25 | 0.65    |
|                    |            |           |           | [6,6]                  | 0.61 | 0.49 | 0.40 | 0.20 | 0.70    |
|                    |            |           |           | [7,7]                  | 0.62 | 0.51 | 0.43 | 0.26 | 0.67    |
|                    |            |           | Recall    | [6,6]                  | 0.59 | 0.47 | 0.35 | 0.18 | 0.67    |
|                    |            |           |           | [7,7]                  | 0.60 | 0.49 | 0.38 | 0.26 | 0.66    |
|                    |            |           |           | [6,6]                  | 0.37 | 0.33 | 0.28 | 0.19 | 0.47    |
|                    | Greengenes | F1-score  | [7,7]     | 0.41                   | 0.35 | 0.31 | 0.26 | 0.47 |         |
|                    |            |           | [6,6]     | 0.40                   | 0.34 | 0.30 | 0.21 | 0.51 |         |
|                    |            |           | [7,7]     | 0.43                   | 0.36 | 0.32 | 0.27 | 0.50 |         |
|                    |            | Precision | [6,6]     | 0.37                   | 0.34 | 0.27 | 0.19 | 0.47 |         |
|                    |            |           | [7,7]     | 0.41                   | 0.35 | 0.31 | 0.26 | 0.47 |         |
|                    |            |           | [6,6]     | 0.61                   | 0.43 | 0.27 | 0.13 | 0.82 |         |
|                    | ITGDB      | F1-score  | [7,7]     | 0.63                   | 0.46 | 0.34 | 0.15 | 0.79 |         |
|                    |            |           | [6,6]     | 0.62                   | 0.45 | 0.27 | 0.15 | 0.84 |         |
|                    |            |           | [7,7]     | 0.66                   | 0.46 | 0.34 | 0.17 | 0.83 |         |
|                    |            | Recall    | [6,6]     | 0.62                   | 0.44 | 0.27 | 0.13 | 0.83 |         |
|                    |            |           | [7,7]     | 0.64                   | 0.47 | 0.36 | 0.14 | 0.80 |         |
|                    |            |           | [6,6]     | 0.53                   | 0.53 | 0.38 | 0.29 | 0.60 |         |
|                    | RDP        | F1-score  | [7,7]     | 0.57                   | 0.54 | 0.43 | 0.34 | 0.62 |         |
|                    |            |           | [6,6]     | 0.61                   | 0.60 | 0.39 | 0.31 | 0.64 |         |
|                    |            |           | [7,7]     | 0.67                   | 0.61 | 0.45 | 0.36 | 0.69 |         |
|                    |            | Precision | [6,6]     | 0.51                   | 0.50 | 0.37 | 0.28 | 0.58 |         |
|                    |            |           | [7,7]     | 0.54                   | 0.51 | 0.42 | 0.33 | 0.59 |         |
|                    |            |           | [6,6]     | 0.53                   | 0.42 | 0.25 | 0.16 | 0.72 |         |
|                    | SILVA      | F1-score  | [7,7]     | 0.61                   | 0.52 | 0.37 | 0.23 | 0.70 |         |
|                    |            |           | [6,6]     | 0.53                   | 0.45 | 0.27 | 0.18 | 0.75 |         |
|                    |            |           | [7,7]     | 0.61                   | 0.53 | 0.43 | 0.24 | 0.74 |         |
|                    |            | Recall    | [6,6]     | 0.54                   | 0.40 | 0.25 | 0.14 | 0.73 |         |
|                    |            |           | [7,7]     | 0.62                   | 0.52 | 0.36 | 0.22 | 0.70 |         |
|                    |            |           | [6,6]     | 0.68                   | 0.50 | 0.35 | 0.14 | 0.78 |         |
| GSR                | F1-score   | [7,7]     | 0.70      | 0.57                   | 0.35 | 0.21 | 0.78 |      |         |
|                    |            | [6,6]     | 0.68      | 0.50                   | 0.35 | 0.14 | 0.78 |      |         |
|                    |            | [7,7]     | 0.70      | 0.57                   | 0.35 | 0.21 | 0.78 |      |         |
|                    | Precision  | [6,6]     | 0.68      | 0.50                   | 0.35 | 0.14 | 0.78 |      |         |
|                    |            | [7,7]     | 0.70      | 0.57                   | 0.35 | 0.21 | 0.78 |      |         |
|                    |            | [6,6]     | 0.49      | 0.45                   | 0.20 | 0.08 | 0.54 |      |         |
| GTDB               | F1-score   | [7,7]     | 0.49      | 0.48                   | 0.22 | 0.08 | 0.54 |      |         |
|                    |            | [6,6]     | 0.49      | 0.45                   | 0.20 | 0.08 | 0.54 |      |         |
|                    |            | [7,7]     | 0.49      | 0.48                   | 0.22 | 0.08 | 0.54 |      |         |
|                    | Precision  | [6,6]     | 0.49      | 0.45                   | 0.20 | 0.08 | 0.54 |      |         |
|                    |            | [7,7]     | 0.49      | 0.48                   | 0.22 | 0.08 | 0.54 |      |         |
|                    |            | [6,6]     | 0.49      | 0.45                   | 0.20 | 0.08 | 0.54 |      |         |
| Greengenes         | F1-score   | [7,7]     | 0.49      | 0.48                   | 0.22 | 0.08 | 0.54 |      |         |
|                    |            | [6,6]     | 0.37      | 0.29                   | 0.18 | 0.09 | 0.48 |      |         |
|                    |            | [7,7]     | 0.37      | 0.29                   | 0.21 | 0.11 | 0.48 |      |         |
|                    | Precision  | [6,6]     | 0.37      | 0.29                   | 0.18 | 0.09 | 0.48 |      |         |
|                    |            | [7,7]     | 0.37      | 0.29                   | 0.21 | 0.11 | 0.48 |      |         |
|                    |            | [6,6]     | 0.37      | 0.29                   | 0.21 | 0.11 | 0.48 |      |         |

Continued on next page

Supplementary Table 4: Supplementary table 4. N-gram-range and confidence threshold benchmarking at species level. F1-score, precision and recall are shown for each database, evaluated region and validation datasets. The values are the average of the five metagenomic samples. Bold represents the highest value.

| Validation Dataset | Region     | Database  | Metrics   | Conf. thres.<br>N-gram | <b>0.5</b> | <b>0.7</b> | <b>0.9</b> | <b>0.98</b> | <b>disable</b> |
|--------------------|------------|-----------|-----------|------------------------|------------|------------|------------|-------------|----------------|
| full-16S           | ITGDB      | Recall    | [6,6]     | 0.37                   | 0.29       | 0.18       | 0.09       | 0.48        |                |
|                    |            |           | [7,7]     | 0.37                   | 0.29       | 0.21       | 0.11       | 0.48        |                |
|                    |            | F1-score  | [6,6]     | 0.42                   | 0.26       | 0.16       | 0.01       | 0.89        |                |
|                    |            |           | [7,7]     | 0.56                   | 0.32       | 0.17       | 0.01       | 0.91        |                |
|                    |            | Precision | [6,6]     | 0.42                   | 0.26       | 0.16       | 0.01       | 0.89        |                |
|                    |            |           | [7,7]     | 0.56                   | 0.32       | 0.17       | 0.01       | 0.91        |                |
|                    |            | Recall    | [6,6]     | 0.42                   | 0.26       | 0.16       | 0.01       | 0.89        |                |
|                    |            |           | [7,7]     | 0.56                   | 0.32       | 0.17       | 0.01       | 0.91        |                |
|                    |            | RDP       | F1-score  | [6,6]                  | 0.44       | 0.27       | 0.20       | 0.11        | 0.56           |
|                    |            |           |           | [7,7]                  | 0.44       | 0.40       | 0.20       | 0.11        | 0.56           |
|                    |            |           | Precision | [6,6]                  | 0.44       | 0.27       | 0.20       | 0.11        | 0.56           |
|                    |            |           |           | [7,7]                  | 0.44       | 0.40       | 0.20       | 0.11        | 0.56           |
|                    | Recall     | [6,6]     | 0.44      | 0.27                   | 0.20       | 0.11       | 0.56       |             |                |
|                    |            | [7,7]     | 0.44      | 0.40                   | 0.20       | 0.11       | 0.56       |             |                |
|                    | SILVA      | F1-score  | [6,6]     | 0.31                   | 0.20       | 0.11       | 0.04       | 0.78        |                |
|                    |            |           | [7,7]     | 0.38                   | 0.25       | 0.13       | 0.04       | 0.79        |                |
|                    |            | Precision | [6,6]     | 0.31                   | 0.20       | 0.11       | 0.04       | 0.78        |                |
|                    |            |           | [7,7]     | 0.38                   | 0.25       | 0.13       | 0.04       | 0.79        |                |
|                    | Recall     | [6,6]     | 0.31      | 0.20                   | 0.11       | 0.04       | 0.78       |             |                |
|                    |            | [7,7]     | 0.38      | 0.25                   | 0.13       | 0.04       | 0.79       |             |                |
|                    | GSR        | F1-score  | [6,6]     | 0.75                   | 0.70       | 0.62       | 0.44       | 0.79        |                |
|                    |            |           | [7,7]     | 0.74                   | 0.71       | 0.66       | 0.60       | 0.77        |                |
|                    |            | Precision | [6,6]     | 0.77                   | 0.72       | 0.66       | 0.44       | 0.83        |                |
|                    |            |           | [7,7]     | 0.75                   | 0.73       | 0.66       | 0.62       | 0.79        |                |
|                    | Recall     | [6,6]     | 0.75      | 0.70                   | 0.61       | 0.43       | 0.79       |             |                |
|                    |            | [7,7]     | 0.75      | 0.71                   | 0.67       | 0.59       | 0.77       |             |                |
|                    | GTDB       | F1-score  | [6,6]     | 0.30                   | 0.25       | 0.19       | 0.13       | 0.33        |                |
|                    |            |           | [7,7]     | 0.32                   | 0.29       | 0.24       | 0.20       | 0.35        |                |
|                    |            | Precision | [6,6]     | 0.32                   | 0.27       | 0.21       | 0.18       | 0.34        |                |
|                    |            |           | [7,7]     | 0.34                   | 0.31       | 0.25       | 0.23       | 0.37        |                |
|                    | Recall     | [6,6]     | 0.30      | 0.24                   | 0.18       | 0.11       | 0.33       |             |                |
|                    |            | [7,7]     | 0.31      | 0.28                   | 0.23       | 0.19       | 0.34       |             |                |
|                    | Greengenes | F1-score  | [6,6]     | 0.49                   | 0.42       | 0.36       | 0.25       | 0.50        |                |
|                    |            |           | [7,7]     | 0.51                   | 0.48       | 0.40       | 0.36       | 0.52        |                |
|                    |            | Precision | [6,6]     | 0.51                   | 0.45       | 0.38       | 0.28       | 0.53        |                |
|                    |            |           | [7,7]     | 0.53                   | 0.52       | 0.41       | 0.38       | 0.55        |                |
|                    | Recall     | [6,6]     | 0.49      | 0.42                   | 0.35       | 0.25       | 0.50       |             |                |
|                    |            | [7,7]     | 0.51      | 0.47                   | 0.40       | 0.36       | 0.52       |             |                |
|                    | ITGDB      | F1-score  | [6,6]     | 0.79                   | 0.66       | 0.38       | 0.19       | 0.85        |                |
|                    |            |           | [7,7]     | 0.80                   | 0.71       | 0.54       | 0.32       | 0.84        |                |
|                    |            | Precision | [6,6]     | 0.79                   | 0.70       | 0.41       | 0.26       | 0.87        |                |
|                    |            |           | [7,7]     | 0.82                   | 0.75       | 0.60       | 0.36       | 0.86        |                |
|                    | Recall     | [6,6]     | 0.80      | 0.65                   | 0.37       | 0.17       | 0.86       |             |                |
|                    |            | [7,7]     | 0.81      | 0.71                   | 0.52       | 0.30       | 0.86       |             |                |
|                    | RDP        | F1-score  | [6,6]     | 0.72                   | 0.64       | 0.54       | 0.42       | 0.76        |                |
|                    |            |           | [7,7]     | 0.76                   | 0.72       | 0.63       | 0.52       | 0.76        |                |
|                    |            | Precision | [6,6]     | 0.79                   | 0.69       | 0.59       | 0.50       | 0.79        |                |
|                    |            |           | [7,7]     | 0.79                   | 0.75       | 0.74       | 0.56       | 0.79        |                |
| Recall             | [6,6]      | 0.69      | 0.62      | 0.52                   | 0.40       | 0.75       |            |             |                |
|                    | [7,7]      | 0.75      | 0.71      | 0.61                   | 0.50       | 0.75       |            |             |                |
| SILVA              | F1-score   | [6,6]     | 0.77      | 0.70                   | 0.49       | 0.30       | 0.80       |             |                |
|                    |            | [7,7]     | 0.79      | 0.74                   | 0.70       | 0.54       | 0.82       |             |                |
|                    | Precision  | [6,6]     | 0.78      | 0.73                   | 0.53       | 0.31       | 0.82       |             |                |
|                    |            | [7,7]     | 0.79      | 0.76                   | 0.73       | 0.63       | 0.84       |             |                |
| Recall             | [6,6]      | 0.77      | 0.69      | 0.47                   | 0.29       | 0.81       |            |             |                |
|                    | [7,7]      | 0.80      | 0.74      | 0.69                   | 0.51       | 0.82       |            |             |                |
| GSR                | F1-score   | [6,6]     | 0.83      | 0.83                   | 0.80       | 0.77       | 0.83       |             |                |
|                    |            | [7,7]     | 0.83      | 0.83                   | 0.80       | 0.77       | 0.83       |             |                |
|                    | Precision  | [6,6]     | 0.96      | 0.96                   | 0.96       | 0.97       | 0.96       |             |                |
|                    |            | [7,7]     | 0.96      | 0.96                   | 0.96       | 0.97       | 0.96       |             |                |
| Recall             | [6,6]      | 0.78      | 0.78      | 0.73                   | 0.68       | 0.78       |            |             |                |
|                    | [7,7]      | 0.78      | 0.78      | 0.73                   | 0.68       | 0.78       |            |             |                |

Continued on next page



Supplementary Table 4: Supplementary table 4. N-gram-range and confidence threshold benchmarking at species level. F1-score, precision and recall are shown for each database, evaluated region and validation datasets. The values are the average of the five metagenomic samples. Bold represents the highest value.

| Validation Dataset | Region    | Database   | Metrics   | Conf. thres.<br>N-gram | 0.5         | 0.7         | 0.9         | 0.98        | disable |
|--------------------|-----------|------------|-----------|------------------------|-------------|-------------|-------------|-------------|---------|
|                    | V3-V4     | GTDB       | F1-score  | [7,7]                  | 0.78        | 0.78        | 0.73        | 0.69        | 0.78    |
|                    |           |            |           | [6,6]                  | 0.54        | 0.51        | 0.51        | 0.49        | 0.55    |
|                    |           |            | [7,7]     | 0.54                   | 0.52        | 0.51        | 0.49        | 0.55        |         |
|                    |           |            | Precision | [6,6]                  | 0.89        | 0.85        | 0.85        | 0.87        | 0.89    |
|                    |           |            |           | [7,7]                  | 0.89        | 0.89        | 0.85        | 0.87        | 0.89    |
|                    |           |            | Recall    | [6,6]                  | 0.46        | 0.42        | 0.42        | 0.38        | 0.48    |
|                    |           | [7,7]      |           | 0.46                   | 0.43        | 0.42        | 0.38        | 0.47        |         |
|                    |           | Greengenes | F1-score  | [6,6]                  | 0.53        | 0.53        | 0.52        | 0.52        | 0.52    |
|                    |           |            |           | [7,7]                  | 0.54        | 0.53        | 0.52        | 0.52        | 0.54    |
|                    |           |            | Precision | [6,6]                  | 0.70        | 0.70        | 0.70        | 0.70        | 0.70    |
|                    |           |            |           | [7,7]                  | 0.73        | 0.70        | 0.70        | 0.70        | 0.73    |
|                    |           |            | Recall    | [6,6]                  | 0.50        | 0.49        | 0.48        | 0.47        | 0.50    |
|                    | [7,7]     |            |           | 0.51                   | 0.49        | 0.49        | 0.48        | 0.51        |         |
|                    | ITGDB     | F1-score   | [6,6]     | 0.79                   | 0.79        | 0.79        | 0.78        | 0.80        |         |
|                    |           |            | [7,7]     | 0.80                   | 0.80        | 0.79        | 0.79        | 0.81        |         |
|                    |           | Precision  | [6,6]     | 0.95                   | 0.97        | 0.97        | 0.97        | 0.95        |         |
|                    |           |            | [7,7]     | 0.97                   | 0.97        | 0.97        | 0.97        | 0.97        |         |
|                    |           | Recall     | [6,6]     | 0.72                   | 0.71        | 0.70        | 0.69        | 0.72        |         |
|                    |           |            | [7,7]     | 0.72                   | 0.72        | 0.70        | 0.69        | 0.72        |         |
|                    | RDP       | F1-score   | [6,6]     | 0.30                   | 0.32        | 0.29        | 0.29        | 0.30        |         |
|                    |           |            | [7,7]     | 0.30                   | 0.30        | 0.30        | 0.29        | 0.30        |         |
|                    |           | Precision  | [6,6]     | 0.27                   | 0.30        | 0.31        | 0.31        | 0.27        |         |
|                    |           |            | [7,7]     | 0.27                   | 0.27        | 0.30        | 0.31        | 0.27        |         |
|                    |           | Recall     | [6,6]     | 0.35                   | 0.35        | 0.28        | 0.28        | 0.35        |         |
| [7,7]              |           |            | 0.35      | 0.35                   | 0.31        | 0.28        | 0.35        |             |         |
| SILVA              | F1-score  | [6,6]      | 0.33      | 0.32                   | 0.30        | 0.30        | 0.33        |             |         |
|                    |           | [7,7]      | 0.33      | 0.31                   | 0.30        | 0.29        | 0.33        |             |         |
|                    | Precision | [6,6]      | 0.32      | 0.32                   | 0.31        | 0.33        | 0.32        |             |         |
|                    |           | [7,7]      | 0.32      | 0.32                   | 0.31        | 0.31        | 0.32        |             |         |
|                    | Recall    | [6,6]      | 0.37      | 0.36                   | 0.33        | 0.32        | 0.37        |             |         |
|                    |           | [7,7]      | 0.37      | 0.35                   | 0.33        | 0.33        | 0.37        |             |         |
| V3-V4              | GSR       | F1-score   | [6,6]     | 0.94                   | 0.88        | 0.82        | 0.73        | 0.94        |         |
|                    |           |            | [7,7]     | 0.96                   | 0.92        | 0.85        | 0.76        | 0.96        |         |
|                    |           | Precision  | [6,6]     | <b>1.00</b>            | <b>1.00</b> | <b>1.00</b> | <b>1.00</b> | <b>1.00</b> |         |
|                    |           |            | [7,7]     | <b>1.00</b>            | <b>1.00</b> | <b>1.00</b> | <b>1.00</b> | <b>1.00</b> |         |
|                    |           | Recall     | [6,6]     | 0.89                   | 0.81        | 0.75        | 0.68        | 0.90        |         |
|                    |           |            | [7,7]     | 0.92                   | 0.86        | 0.78        | 0.70        | 0.92        |         |
|                    | GTDB      | F1-score   | [6,6]     | 0.58                   | 0.50        | 0.50        | 0.50        | 0.62        |         |
|                    |           |            | [7,7]     | 0.55                   | 0.54        | 0.50        | 0.50        | 0.55        |         |
|                    |           | Precision  | [6,6]     | 0.64                   | 0.64        | 0.64        | 0.64        | 0.66        |         |
|                    |           |            | [7,7]     | 0.66                   | 0.64        | 0.64        | 0.64        | 0.66        |         |
|                    |           | Recall     | [6,6]     | 0.53                   | 0.41        | 0.41        | 0.41        | 0.59        |         |
|                    |           |            | [7,7]     | 0.48                   | 0.47        | 0.41        | 0.41        | 0.48        |         |
| Greengenes         | F1-score  | [6,6]      | 0.58      | 0.57                   | 0.55        | 0.53        | 0.64        |             |         |
|                    |           | [7,7]      | 0.62      | 0.55                   | 0.55        | 0.55        | 0.67        |             |         |
|                    | Precision | [6,6]      | 0.66      | 0.64                   | 0.64        | 0.63        | 0.79        |             |         |
|                    |           | [7,7]      | 0.78      | 0.65                   | 0.64        | 0.64        | 0.79        |             |         |
|                    | Recall    | [6,6]      | 0.52      | 0.52                   | 0.49        | 0.46        | 0.57        |             |         |
|                    |           | [7,7]      | 0.56      | 0.49                   | 0.49        | 0.49        | 0.60        |             |         |
| ITGDB              | F1-score  | [6,6]      | 0.92      | 0.88                   | 0.81        | 0.71        | 0.94        |             |         |
|                    |           | [7,7]      | 0.94      | 0.89                   | 0.83        | 0.73        | 0.94        |             |         |
|                    | Precision | [6,6]      | 0.99      | 0.99                   | 0.98        | 0.98        | <b>1.00</b> |             |         |
|                    |           | [7,7]      | 0.99      | 0.99                   | 0.98        | 0.98        | <b>1.00</b> |             |         |
|                    | Recall    | [6,6]      | 0.87      | 0.81                   | 0.73        | 0.65        | 0.90        |             |         |
|                    |           | [7,7]      | 0.89      | 0.82                   | 0.76        | 0.67        | 0.90        |             |         |
| RDP                | F1-score  | [6,6]      | 0.63      | 0.63                   | 0.62        | 0.58        | 0.64        |             |         |
|                    |           | [7,7]      | 0.64      | 0.63                   | 0.62        | 0.59        | 0.64        |             |         |
|                    | Precision | [6,6]      | 0.69      | 0.69                   | 0.68        | 0.68        | 0.71        |             |         |
|                    |           | [7,7]      | 0.71      | 0.69                   | 0.68        | 0.68        | 0.71        |             |         |
|                    | Recall    | [6,6]      | 0.58      | 0.58                   | 0.57        | 0.51        | 0.59        |             |         |
|                    |           | [7,7]      | 0.59      | 0.58                   | 0.57        | 0.51        | 0.59        |             |         |

Continued on next page

Supplementary Table 4: Supplementary table 4. N-gram-range and confidence threshold benchmarking at species level. F1-score, precision and recall are shown for each database, evaluated region and validation datasets. The values are the average of the five metagenomic samples. Bold represents the highest value.

| Validation Dataset | Region     | Database   | Metrics   | Conf. thres.<br>N-gram | 0.5         | 0.7         | 0.9         | 0.98        | disable     |
|--------------------|------------|------------|-----------|------------------------|-------------|-------------|-------------|-------------|-------------|
| V3-V5              | V3         | SILVA      | F1-score  | [6,6]                  | 0.85        | 0.77        | 0.60        | 0.47        | 0.87        |
|                    |            |            |           | [7,7]                  | 0.87        | 0.81        | 0.74        | 0.60        | 0.91        |
|                    |            |            | Precision | [6,6]                  | <b>1.00</b> | 0.99        | 0.99        | 0.94        | <b>1.00</b> |
|                    |            |            |           | [7,7]                  | <b>1.00</b> | <b>1.00</b> | 0.99        | 0.99        | <b>1.00</b> |
|                    |            |            | Recall    | [6,6]                  | 0.74        | 0.65        | 0.45        | 0.33        | 0.78        |
|                    |            |            |           | [7,7]                  | 0.78        | 0.69        | 0.61        | 0.48        | 0.83        |
|                    |            | GSR        | F1-score  | [6,6]                  | 0.97        | 0.92        | 0.83        | 0.76        | 0.98        |
|                    |            |            |           | [7,7]                  | 0.98        | 0.97        | 0.88        | 0.79        | 0.98        |
|                    |            |            | Precision | [6,6]                  | <b>1.00</b> | <b>1.00</b> | <b>1.00</b> | <b>1.00</b> | <b>1.00</b> |
|                    |            |            |           | [7,7]                  | <b>1.00</b> | <b>1.00</b> | <b>1.00</b> | <b>1.00</b> | <b>1.00</b> |
|                    |            |            | Recall    | [6,6]                  | 0.95        | 0.87        | 0.77        | 0.71        | 0.97        |
|                    |            |            |           | [7,7]                  | 0.97        | 0.94        | 0.82        | 0.73        | 0.97        |
|                    | GTDB       | F1-score   | [6,6]     | 0.52                   | 0.51        | 0.51        | 0.50        | 0.62        |             |
|                    |            |            | [7,7]     | 0.56                   | 0.51        | 0.51        | 0.51        | 0.56        |             |
|                    |            | Precision  | [6,6]     | 0.67                   | 0.65        | 0.64        | 0.64        | 0.94        |             |
|                    |            |            | [7,7]     | 0.67                   | 0.65        | 0.64        | 0.64        | 0.67        |             |
|                    |            | Recall     | [6,6]     | 0.43                   | 0.42        | 0.42        | 0.42        | 0.52        |             |
|                    |            |            | [7,7]     | 0.48                   | 0.42        | 0.42        | 0.42        | 0.48        |             |
|                    | Greengenes | F1-score   | [6,6]     | 0.57                   | 0.56        | 0.56        | 0.54        | 0.66        |             |
|                    |            |            | [7,7]     | 0.61                   | 0.56        | 0.56        | 0.56        | 0.70        |             |
|                    |            | Precision  | [6,6]     | 0.66                   | 0.64        | 0.64        | 0.64        | 0.79        |             |
|                    |            |            | [7,7]     | 0.78                   | 0.66        | 0.64        | 0.64        | 0.79        |             |
|                    |            | Recall     | [6,6]     | 0.51                   | 0.50        | 0.50        | 0.48        | 0.58        |             |
|                    |            |            | [7,7]     | 0.54                   | 0.51        | 0.50        | 0.50        | 0.64        |             |
| V4                 | V4         | ITGDB      | F1-score  | [6,6]                  | 0.95        | 0.91        | 0.79        | 0.71        | 0.97        |
|                    |            |            |           | [7,7]                  | 0.96        | 0.95        | 0.84        | 0.75        | 0.97        |
|                    |            |            | Precision | [6,6]                  | 0.99        | 0.99        | 0.99        | 0.99        | <b>1.00</b> |
|                    |            | [7,7]      |           | 0.99                   | 0.99        | 0.99        | 0.99        | <b>1.00</b> |             |
|                    |            | Recall     | [6,6]     | 0.92                   | 0.84        | 0.71        | 0.65        | 0.94        |             |
|                    |            |            | [7,7]     | 0.93                   | 0.90        | 0.76        | 0.68        | 0.94        |             |
| V5                 | V5         | RDP        | F1-score  | [6,6]                  | 0.63        | 0.63        | 0.60        | 0.56        | 0.68        |
|                    |            |            |           | [7,7]                  | 0.65        | 0.63        | 0.63        | 0.60        | 0.74        |
|                    |            |            | Precision | [6,6]                  | 0.71        | 0.71        | 0.70        | 0.70        | 0.73        |
|                    |            | [7,7]      |           | 0.73                   | 0.71        | 0.70        | 0.70        | 0.97        |             |
|                    |            | Recall     | [6,6]     | 0.58                   | 0.57        | 0.53        | 0.48        | 0.64        |             |
|                    |            |            | [7,7]     | 0.59                   | 0.58        | 0.57        | 0.53        | 0.67        |             |
| V6                 | V6         | SILVA      | F1-score  | [6,6]                  | 0.83        | 0.75        | 0.58        | 0.40        | 0.88        |
|                    |            |            |           | [7,7]                  | 0.85        | 0.79        | 0.66        | 0.57        | 0.85        |
|                    |            |            | Precision | [6,6]                  | <b>1.00</b> | <b>1.00</b> | 0.98        | 0.92        | <b>1.00</b> |
|                    |            | [7,7]      |           | <b>1.00</b>            | <b>1.00</b> | <b>1.00</b> | 0.93        | <b>1.00</b> |             |
|                    |            | Recall     | [6,6]     | 0.73                   | 0.60        | 0.43        | 0.27        | 0.80        |             |
|                    |            |            | [7,7]     | 0.75                   | 0.66        | 0.51        | 0.44        | 0.75        |             |
| V7                 | V7         | GSR        | F1-score  | [6,6]                  | 0.92        | 0.89        | 0.77        | 0.72        | 0.94        |
|                    |            |            |           | [7,7]                  | 0.94        | 0.90        | 0.82        | 0.72        | 0.95        |
|                    |            |            | Precision | [6,6]                  | 0.98        | 0.98        | 0.97        | 0.95        | 0.98        |
|                    |            | [7,7]      |           | 0.98                   | 0.98        | 0.97        | 0.95        | 0.98        |             |
|                    |            | Recall     | [6,6]     | 0.88                   | 0.83        | 0.71        | 0.67        | 0.91        |             |
|                    |            |            | [7,7]     | 0.90                   | 0.84        | 0.76        | 0.68        | 0.93        |             |
| V8                 | V8         | GTDB       | F1-score  | [6,6]                  | 0.50        | 0.50        | 0.50        | 0.49        | 0.57        |
|                    |            |            |           | [7,7]                  | 0.50        | 0.50        | 0.50        | 0.50        | 0.56        |
|                    |            |            | Precision | [6,6]                  | 0.63        | 0.63        | 0.63        | 0.62        | 0.66        |
|                    |            | [7,7]      |           | 0.63                   | 0.63        | 0.63        | 0.63        | 0.66        |             |
|                    |            | Recall     | [6,6]     | 0.42                   | 0.42        | 0.42        | 0.41        | 0.50        |             |
|                    |            |            | [7,7]     | 0.42                   | 0.42        | 0.42        | 0.42        | 0.49        |             |
| V9                 | V9         | Greengenes | F1-score  | [6,6]                  | 0.55        | 0.55        | 0.55        | 0.54        | 0.63        |
|                    |            |            |           | [7,7]                  | 0.57        | 0.55        | 0.55        | 0.55        | 0.68        |
|                    |            |            | Precision | [6,6]                  | 0.63        | 0.63        | 0.63        | 0.62        | 0.76        |
|                    |            | [7,7]      |           | 0.63                   | 0.63        | 0.63        | 0.63        | 0.76        |             |
|                    |            | Recall     | [6,6]     | 0.50                   | 0.50        | 0.49        | 0.49        | 0.57        |             |
|                    |            |            | [7,7]     | 0.52                   | 0.50        | 0.49        | 0.49        | 0.62        |             |
| V10                | V10        | ITGDB      | F1-score  | [6,6]                  | 0.91        | 0.84        | 0.72        | 0.67        | 0.95        |
|                    |            |            |           | [7,7]                  | 0.91        | 0.84        | 0.72        | 0.67        | 0.95        |

Continued on next page

Supplementary Table 4: Supplementary table 4. N-gram-range and confidence threshold benchmarking at species level. F1-score, precision and recall are shown for each database, evaluated region and validation datasets. The values are the average of the five metagenomic samples. Bold represents the highest value.

| Validation Dataset | Region    | Database  | Metrics     | Conf. thres.<br>N-gram | 0.5         | 0.7         | 0.9         | 0.98        | disable     |
|--------------------|-----------|-----------|-------------|------------------------|-------------|-------------|-------------|-------------|-------------|
| full-16S           | RDP       | Precision | [6,6]       | 0.91                   | 0.86        | 0.77        | 0.68        | 0.95        |             |
|                    |           |           | [7,7]       | <b>0.97</b>            | <b>0.97</b> | <b>0.95</b> | <b>0.94</b> | <b>0.98</b> |             |
|                    |           |           | [6,6]       | 0.97                   | 0.97        | 0.95        | 0.95        | 0.98        |             |
|                    |           |           | [7,7]       | <b>0.87</b>            | <b>0.77</b> | <b>0.65</b> | <b>0.61</b> | <b>0.92</b> |             |
|                    |           |           | [6,6]       | 0.87                   | 0.79        | 0.69        | 0.62        | 0.92        |             |
|                    |           |           | [7,7]       | <b>0.61</b>            | <b>0.61</b> | <b>0.57</b> | <b>0.57</b> | <b>0.67</b> |             |
|                    |           | Recall    | [6,6]       | <b>0.70</b>            | <b>0.70</b> | <b>0.70</b> | <b>0.69</b> | <b>0.70</b> |             |
|                    |           |           | [7,7]       | 0.70                   | 0.70        | 0.70        | 0.69        | 0.70        |             |
|                    |           |           | [6,6]       | <b>0.54</b>            | <b>0.54</b> | <b>0.49</b> | <b>0.49</b> | <b>0.65</b> |             |
|                    |           |           | [7,7]       | 0.59                   | 0.54        | 0.54        | 0.49        | 0.65        |             |
|                    |           |           | F1-score    | [6,6]                  | <b>0.80</b> | <b>0.66</b> | <b>0.53</b> | <b>0.08</b> | <b>0.82</b> |
|                    |           |           |             | [7,7]                  | 0.80        | 0.70        | 0.61        | 0.50        | 0.86        |
|                    | SILVA     | Precision |             | [6,6]                  | <b>0.97</b> | <b>0.97</b> | <b>0.94</b> | <b>0.33</b> | <b>0.98</b> |
|                    |           |           |             | [7,7]                  | 0.97        | 0.97        | 0.94        | 0.94        | 0.98        |
|                    |           |           |             | [6,6]                  | <b>0.69</b> | <b>0.52</b> | <b>0.39</b> | <b>0.05</b> | <b>0.72</b> |
|                    |           | Recall    |             | [6,6]                  | <b>0.69</b> | <b>0.56</b> | <b>0.46</b> | <b>0.36</b> | <b>0.77</b> |
|                    |           |           | [7,7]       | 0.98                   | 0.98        | 0.98        | 0.93        | 0.98        |             |
|                    |           |           | [6,6]       | <b>1.00</b>            | <b>1.00</b> | <b>1.00</b> | <b>1.00</b> | <b>1.00</b> |             |
|                    | GSR       | Precision | [6,6]       | <b>1.00</b>            | <b>1.00</b> | <b>1.00</b> | <b>1.00</b> | <b>1.00</b> |             |
|                    |           |           | [7,7]       | <b>1.00</b>            | <b>1.00</b> | <b>1.00</b> | <b>1.00</b> | <b>1.00</b> |             |
|                    |           |           | [6,6]       | 0.96                   | 0.96        | 0.95        | 0.88        | 0.96        |             |
|                    |           | Recall    | [6,6]       | 0.96                   | 0.96        | 0.96        | 0.95        | 0.96        |             |
|                    |           |           | [7,7]       | 0.73                   | 0.65        | 0.47        | 0.40        | 0.78        |             |
|                    |           |           | [6,6]       | <b>0.88</b>            | <b>0.87</b> | <b>0.63</b> | <b>0.62</b> | <b>0.88</b> |             |
| GTDB               | Precision | [6,6]     | <b>0.88</b> | <b>0.88</b>            | <b>0.88</b> | <b>0.62</b> | <b>0.88</b> |             |             |
|                    |           | [7,7]     | 0.62        | 0.53                   | 0.37        | 0.29        | 0.71        |             |             |
|                    |           | [6,6]     | <b>0.62</b> | <b>0.53</b>            | <b>0.37</b> | <b>0.29</b> | <b>0.71</b> |             |             |
|                    | Recall    | [6,6]     | 0.53        | 0.49                   | 0.38        | 0.30        | 0.54        |             |             |
|                    |           | [7,7]     | 0.72        | 0.71                   | 0.65        | 0.59        | 0.73        |             |             |
|                    |           | [6,6]     | <b>0.82</b> | <b>0.82</b>            | <b>0.78</b> | <b>0.76</b> | <b>0.82</b> |             |             |
| Greengenes         | Precision | [6,6]     | <b>0.82</b> | <b>0.82</b>            | <b>0.78</b> | <b>0.76</b> | <b>0.82</b> |             |             |
|                    |           | [7,7]     | 0.80        | 0.80                   | 0.81        | 0.79        | 0.80        |             |             |
|                    |           | [6,6]     | <b>0.66</b> | <b>0.64</b>            | <b>0.57</b> | <b>0.52</b> | <b>0.68</b> |             |             |
|                    | Recall    | [6,6]     | 0.65        | 0.64                   | 0.61        | 0.59        | 0.66        |             |             |
|                    |           | [7,7]     | 0.98        | 0.97                   | 0.96        | 0.89        | 0.98        |             |             |
|                    |           | [6,6]     | <b>0.98</b> | <b>0.97</b>            | <b>0.96</b> | <b>0.95</b> | <b>0.98</b> |             |             |
| ITGDB              | Precision | [6,6]     | <b>0.99</b> | <b>0.99</b>            | <b>0.99</b> | <b>0.99</b> | <b>1.00</b> |             |             |
|                    |           | [7,7]     | 0.99        | 0.99                   | 0.99        | 0.99        | 1.00        |             |             |
|                    |           | [6,6]     | <b>0.96</b> | <b>0.95</b>            | <b>0.92</b> | <b>0.83</b> | <b>0.96</b> |             |             |
|                    | Recall    | [6,6]     | 0.96        | 0.96                   | 0.93        | 0.91        | 0.96        |             |             |
|                    |           | [7,7]     | 0.93        | 0.93                   | 0.88        | 0.64        | 0.93        |             |             |
|                    |           | [6,6]     | <b>0.99</b> | <b>1.00</b>            | <b>1.00</b> | <b>0.96</b> | <b>0.99</b> |             |             |
| RDP                | Precision | [6,6]     | <b>1.00</b> | <b>1.00</b>            | <b>1.00</b> | <b>1.00</b> | <b>1.00</b> |             |             |
|                    |           | [7,7]     | <b>1.00</b> | <b>1.00</b>            | <b>1.00</b> | <b>1.00</b> | <b>1.00</b> |             |             |
|                    |           | [6,6]     | 0.89        | 0.88                   | 0.80        | 0.54        | 0.89        |             |             |
|                    | Recall    | [6,6]     | 0.89        | 0.86                   | 0.76        | 0.58        | 0.92        |             |             |
|                    |           | [7,7]     | 0.96        | 0.96                   | 0.91        | 0.87        | 0.96        |             |             |
|                    |           | [6,6]     | <b>1.00</b> | <b>1.00</b>            | <b>1.00</b> | <b>0.99</b> | <b>1.00</b> |             |             |
| SILVA              | Precision | [6,6]     | <b>1.00</b> | <b>1.00</b>            | <b>1.00</b> | <b>1.00</b> | <b>1.00</b> |             |             |
|                    |           | [7,7]     | <b>1.00</b> | <b>1.00</b>            | <b>1.00</b> | <b>1.00</b> | <b>1.00</b> |             |             |
|                    |           | [6,6]     | 0.82        | 0.78                   | 0.65        | 0.43        | 0.85        |             |             |
|                    | Recall    | [6,6]     | 0.82        | 0.78                   | 0.65        | 0.43        | 0.85        |             |             |
|                    |           | [7,7]     | 0.93        | 0.92                   | 0.84        | 0.78        | 0.93        |             |             |
|                    |           | [6,6]     | 0.93        | 0.92                   | 0.84        | 0.78        | 0.93        |             |             |

Supplementary Table 5: Database benchmarking at family levels using validation metrics. F1-score, precision and recall are shown for each database in all the evaluated regions and datasets. Values are the average of the five metagenomic samples. Bold values are the highest and underlined values are the second highest.

| Validation Dataset | Region   | Metrics   | Greengenes | Greengenes2 | GSR         | GTDB | ITGDB       | RDP         | SILVA       |
|--------------------|----------|-----------|------------|-------------|-------------|------|-------------|-------------|-------------|
| gutmock            | V1-V3    | F1-score  | 0.35       | 0.79        | 0.99        | 0.80 | 0.88        | 0.59        | 0.74        |
|                    |          | Precision | 0.36       | 0.84        | 0.99        | 0.85 | 0.88        | 0.59        | 0.83        |
|                    |          | Recall    | 0.35       | 0.77        | 0.98        | 0.78 | 0.88        | 0.61        | 0.71        |
|                    | V3-V4    | F1-score  | 0.28       | 0.82        | 0.98        | 0.75 | 0.92        | 0.82        | 0.50        |
|                    |          | Precision | 0.28       | 0.84        | 0.99        | 0.78 | 0.92        | 0.87        | 0.56        |
|                    |          | Recall    | 0.28       | 0.81        | 0.98        | 0.74 | 0.91        | 0.81        | 0.47        |
|                    | V3-V5    | F1-score  | 0.29       | 0.82        | 0.95        | 0.69 | 0.87        | 0.77        | 0.62        |
|                    |          | Precision | 0.30       | 0.87        | 0.96        | 0.72 | 0.88        | 0.83        | 0.74        |
|                    |          | Recall    | 0.30       | 0.80        | 0.95        | 0.68 | 0.87        | 0.76        | 0.59        |
|                    | V4       | F1-score  | 0.30       | 0.77        | 0.93        | 0.68 | 0.84        | 0.87        | 0.49        |
|                    |          | Precision | 0.30       | 0.81        | 0.94        | 0.70 | 0.86        | 0.88        | 0.57        |
|                    |          | Recall    | 0.30       | 0.76        | 0.92        | 0.68 | 0.84        | 0.87        | 0.46        |
|                    | full-16S | F1-score  | 0.30       | 0.83        | <b>1.00</b> | 0.47 | 0.91        | 0.88        | 0.77        |
|                    |          | Precision | 0.30       | 0.89        | <b>1.00</b> | 0.55 | 0.91        | 0.89        | 0.90        |
|                    |          | Recall    | 0.30       | 0.80        | 0.99        | 0.45 | 0.91        | 0.88        | 0.74        |
| mockrobiota        | V1-V3    | F1-score  | 0.27       | 0.76        | 0.88        | 0.81 | 0.78        | 0.65        | 0.85        |
|                    |          | Precision | 0.30       | 0.79        | 0.92        | 0.87 | 0.81        | 0.69        | 0.88        |
|                    |          | Recall    | 0.26       | 0.75        | 0.87        | 0.79 | 0.78        | 0.64        | 0.84        |
|                    | V3-V4    | F1-score  | 0.33       | 0.86        | 0.90        | 0.75 | 0.86        | 0.51        | 0.75        |
|                    |          | Precision | 0.33       | 0.86        | 0.90        | 0.75 | 0.86        | 0.51        | 0.75        |
|                    |          | Recall    | 0.33       | 0.86        | 0.90        | 0.75 | 0.86        | 0.51        | 0.75        |
|                    | V3-V5    | F1-score  | 0.28       | 0.67        | 0.84        | 0.65 | 0.79        | 0.62        | 0.70        |
|                    |          | Precision | 0.30       | 0.70        | 0.86        | 0.67 | 0.83        | 0.69        | 0.74        |
|                    |          | Recall    | 0.27       | 0.67        | 0.85        | 0.66 | 0.80        | 0.59        | 0.70        |
|                    | V4       | F1-score  | 0.21       | 0.76        | 0.87        | 0.54 | 0.91        | 0.56        | 0.79        |
|                    |          | Precision | 0.21       | 0.76        | 0.87        | 0.54 | 0.91        | 0.56        | 0.79        |
|                    |          | Recall    | 0.21       | 0.76        | 0.87        | 0.54 | 0.91        | 0.56        | 0.79        |
|                    | full-16S | F1-score  | 0.33       | 0.72        | 0.77        | 0.35 | 0.84        | 0.76        | 0.82        |
|                    |          | Precision | 0.36       | 0.74        | 0.79        | 0.37 | 0.86        | 0.79        | 0.84        |
|                    |          | Recall    | 0.32       | 0.72        | 0.77        | 0.34 | 0.86        | 0.75        | 0.82        |
| vagimock           | V1-V3    | F1-score  | 0.51       | 0.56        | 0.87        | 0.55 | 0.81        | 0.30        | 0.33        |
|                    |          | Precision | 0.52       | 0.93        | 0.96        | 0.89 | 0.97        | 0.27        | 0.32        |
|                    |          | Recall    | 0.54       | 0.47        | 0.83        | 0.47 | 0.72        | 0.35        | 0.37        |
|                    | V3-V4    | F1-score  | 0.60       | 0.74        | 0.97        | 0.55 | 0.94        | 0.64        | 0.91        |
|                    |          | Precision | 0.63       | 0.96        | <b>1.00</b> | 0.66 | <b>1.00</b> | 0.71        | <b>1.00</b> |
|                    |          | Recall    | 0.57       | 0.62        | 0.95        | 0.48 | 0.90        | 0.59        | 0.83        |
|                    | V3-V5    | F1-score  | 0.61       | 0.80        | 0.99        | 0.56 | 0.97        | 0.74        | 0.85        |
|                    |          | Precision | 0.63       | 0.94        | <b>1.00</b> | 0.67 | <b>1.00</b> | 0.97        | <b>1.00</b> |
|                    |          | Recall    | 0.59       | 0.70        | 0.99        | 0.48 | 0.94        | 0.67        | 0.75        |
|                    | V4       | F1-score  | 0.59       | 0.77        | 0.96        | 0.56 | 0.95        | 0.67        | 0.86        |
|                    |          | Precision | 0.62       | 0.89        | 0.98        | 0.66 | 0.98        | 0.70        | 0.98        |
|                    |          | Recall    | 0.57       | 0.68        | 0.95        | 0.49 | 0.92        | 0.65        | 0.77        |
|                    | full-16S | F1-score  | 0.61       | 0.82        | 0.98        | 0.67 | 0.98        | 0.96        | 0.96        |
|                    |          | Precision | 0.63       | 0.98        | <b>1.00</b> | 0.88 | <b>1.00</b> | <b>1.00</b> | <b>1.00</b> |
|                    |          | Recall    | 0.59       | 0.73        | 0.96        | 0.54 | 0.96        | 0.92        | 0.93        |

Supplementary Table 6: Database benchmarking at family levels using validation metrics. F1-score, precision and recall are shown for each database in all the evaluated regions and datasets. Values are the average of the five metagenomic samples. Bold values are the highest and underlined values are the second highest.

| Validation Dataset | Region   | Metrics   | Greengenes  | Greengenes2 | GSR         | GTDB        | ITGDB       | RDP         | SILVA       |
|--------------------|----------|-----------|-------------|-------------|-------------|-------------|-------------|-------------|-------------|
| gutmock            | V1-V3    | F1-score  | 0.95        | 0.97        | <b>1.00</b> | 0.98        | 0.98        | 0.97        | 0.99        |
|                    |          | Precision | 0.95        | 0.98        | <b>1.00</b> | 0.98        | 0.98        | 0.97        | 0.99        |
|                    |          | Recall    | 0.95        | 0.96        | <b>1.00</b> | 0.98        | 0.98        | 0.97        | 0.99        |
|                    | V3-V4    | F1-score  | 0.92        | 0.98        | <b>1.00</b> | 0.96        | 0.98        | 0.98        | 0.99        |
|                    |          | Precision | 0.93        | 0.99        | <b>1.00</b> | 0.98        | 0.99        | 0.99        | <b>1.00</b> |
|                    |          | Recall    | 0.92        | 0.97        | 0.99        | 0.96        | 0.98        | 0.98        | 0.98        |
|                    | V3-V5    | F1-score  | 0.91        | 0.98        | <b>1.00</b> | 0.96        | 0.99        | 0.98        | 0.98        |
|                    |          | Precision | 0.92        | 0.98        | <b>1.00</b> | 0.97        | 0.99        | 0.99        | 0.98        |
|                    |          | Recall    | 0.91        | 0.98        | <b>1.00</b> | 0.96        | 0.99        | 0.98        | 0.97        |
|                    | V4       | F1-score  | 0.92        | 0.98        | <b>1.00</b> | 0.95        | 0.99        | 0.98        | 0.99        |
|                    |          | Precision | 0.93        | 0.99        | <b>1.00</b> | 0.97        | 0.99        | 0.99        | <b>1.00</b> |
|                    |          | Recall    | 0.92        | 0.97        | <b>1.00</b> | 0.93        | 0.98        | 0.98        | 0.98        |
|                    | full-16S | F1-score  | 0.92        | 0.98        | <b>1.00</b> | 0.93        | 0.99        | 0.99        | 0.99        |
|                    |          | Precision | 0.94        | 0.98        | <b>1.00</b> | 0.95        | 0.99        | 0.99        | <b>1.00</b> |
|                    |          | Recall    | 0.92        | 0.97        | <b>1.00</b> | 0.92        | 0.99        | 0.99        | 0.98        |
| mockrobiota        | V1-V3    | F1-score  | 0.93        | 0.95        | 0.96        | 0.95        | 0.96        | 0.84        | 0.95        |
|                    |          | Precision | 0.98        | 0.99        | 0.99        | 0.97        | 0.99        | 0.87        | 0.99        |
|                    |          | Recall    | 0.92        | 0.93        | 0.95        | 0.94        | 0.95        | 0.84        | 0.94        |
|                    | V3-V4    | F1-score  | 0.98        | 0.99        | 0.99        | 0.98        | 0.99        | 0.80        | 0.99        |
|                    |          | Precision | 0.98        | 0.99        | 0.99        | 0.98        | 0.99        | 0.80        | 0.99        |
|                    |          | Recall    | 0.98        | 0.99        | 0.99        | 0.99        | 0.99        | 0.80        | 0.99        |
|                    | V3-V5    | F1-score  | 0.95        | 0.97        | 0.98        | 0.96        | 0.99        | 0.88        | 0.98        |
|                    |          | Precision | 0.97        | 0.99        | 0.99        | 0.97        | 0.99        | 0.95        | 0.99        |
|                    |          | Recall    | 0.94        | 0.96        | 0.98        | 0.95        | 0.99        | 0.87        | 0.97        |
|                    | V4       | F1-score  | 0.98        | 0.99        | 0.99        | 0.90        | 0.99        | 0.84        | 0.99        |
|                    |          | Precision | 0.98        | 0.99        | 0.99        | 0.92        | 0.99        | 0.84        | 0.99        |
|                    |          | Recall    | 0.98        | 0.99        | 0.99        | 0.90        | 0.99        | 0.84        | 0.99        |
|                    | full-16S | F1-score  | 0.95        | 0.96        | 0.98        | 0.96        | <b>1.00</b> | 0.86        | 0.97        |
|                    |          | Precision | 0.98        | 0.99        | 0.99        | 0.96        | <b>1.00</b> | 0.87        | 0.99        |
|                    |          | Recall    | 0.94        | 0.95        | 0.98        | 0.97        | 0.99        | 0.86        | 0.96        |
| vagimock           | V1-V3    | F1-score  | <b>1.00</b> | <b>1.00</b> | <b>1.00</b> | <b>1.00</b> | <b>1.00</b> | 0.99        | <b>1.00</b> |
|                    |          | Precision | <b>1.00</b> | <b>1.00</b> | <b>1.00</b> | <b>1.00</b> | <b>1.00</b> | 0.99        | <b>1.00</b> |
|                    |          | Recall    | <b>1.00</b> | <b>1.00</b> | <b>1.00</b> | <b>1.00</b> | <b>1.00</b> | 0.99        | <b>1.00</b> |
|                    | V3-V4    | F1-score  | <b>1.00</b> | <b>1.00</b> | <b>1.00</b> | <b>1.00</b> | <b>1.00</b> | <b>1.00</b> | <b>1.00</b> |
|                    |          | Precision | <b>1.00</b> | <b>1.00</b> | <b>1.00</b> | <b>1.00</b> | <b>1.00</b> | <b>1.00</b> | <b>1.00</b> |
|                    |          | Recall    | <b>1.00</b> | <b>1.00</b> | <b>1.00</b> | <b>1.00</b> | <b>1.00</b> | <b>1.00</b> | <b>1.00</b> |
|                    | V3-V5    | F1-score  | <b>1.00</b> | <b>1.00</b> | <b>1.00</b> | <b>1.00</b> | <b>1.00</b> | <b>1.00</b> | <b>1.00</b> |
|                    |          | Precision | <b>1.00</b> | <b>1.00</b> | <b>1.00</b> | <b>1.00</b> | <b>1.00</b> | <b>1.00</b> | <b>1.00</b> |
|                    |          | Recall    | <b>1.00</b> | <b>1.00</b> | <b>1.00</b> | <b>1.00</b> | <b>1.00</b> | <b>1.00</b> | <b>1.00</b> |
|                    | V4       | F1-score  | <b>1.00</b> | <b>1.00</b> | <b>1.00</b> | <b>1.00</b> | <b>1.00</b> | <b>1.00</b> | <b>1.00</b> |
|                    |          | Precision | <b>1.00</b> | <b>1.00</b> | <b>1.00</b> | <b>1.00</b> | <b>1.00</b> | <b>1.00</b> | <b>1.00</b> |
|                    |          | Recall    | <b>1.00</b> | <b>1.00</b> | <b>1.00</b> | <b>1.00</b> | <b>1.00</b> | <b>1.00</b> | <b>1.00</b> |
|                    | full-16S | F1-score  | <b>1.00</b> | <b>1.00</b> | <b>1.00</b> | 0.99        | <b>1.00</b> | <b>1.00</b> | <b>1.00</b> |
|                    |          | Precision | <b>1.00</b> | <b>1.00</b> | <b>1.00</b> | 0.99        | <b>1.00</b> | <b>1.00</b> | <b>1.00</b> |
|                    |          | Recall    | <b>1.00</b> | <b>1.00</b> | <b>1.00</b> | 0.99        | <b>1.00</b> | <b>1.00</b> | <b>1.00</b> |

Supplementary Table 7: Database benchmarking at genus level using validation metrics. F1-score, precision and recall are shown for each database in all the evaluated regions and datasets. Values are the average of the five metagenomic samples. Bold values are the highest and underlined values are the second highest.

| Validation Dataset | Region   | Metrics   | Greengenes  | Greengenes2 | GSR         | GTDB | ITGDB       | RDP         | SILVA       |
|--------------------|----------|-----------|-------------|-------------|-------------|------|-------------|-------------|-------------|
| gutmock            | V1-V3    | F1-score  | 0.49        | 0.85        | 0.98        | 0.84 | 0.89        | 0.71        | 0.93        |
|                    |          | Precision | 0.66        | 0.87        | 0.99        | 0.87 | 0.90        | 0.75        | 0.94        |
|                    |          | Recall    | 0.53        | 0.85        | 0.98        | 0.83 | 0.90        | 0.71        | 0.92        |
|                    | V3-V4    | F1-score  | 0.51        | 0.89        | 0.99        | 0.86 | 0.92        | 0.91        | 0.89        |
|                    |          | Precision | 0.62        | 0.91        | <b>1.00</b> | 0.87 | 0.93        | 0.92        | 0.92        |
|                    |          | Recall    | 0.54        | 0.89        | 0.99        | 0.86 | 0.92        | 0.90        | 0.88        |
|                    | V3-V5    | F1-score  | 0.52        | 0.88        | 0.98        | 0.85 | 0.91        | 0.90        | 0.91        |
|                    |          | Precision | 0.65        | 0.90        | 0.99        | 0.87 | 0.92        | 0.92        | 0.93        |
|                    |          | Recall    | 0.56        | 0.88        | 0.98        | 0.85 | 0.91        | 0.90        | 0.91        |
|                    | V4       | F1-score  | 0.55        | 0.89        | 0.96        | 0.82 | 0.89        | 0.91        | 0.88        |
|                    |          | Precision | 0.70        | 0.90        | 0.96        | 0.84 | 0.91        | 0.92        | 0.91        |
|                    |          | Recall    | 0.58        | 0.88        | 0.97        | 0.81 | 0.90        | 0.90        | 0.86        |
|                    | full-16S | F1-score  | 0.56        | 0.87        | <b>1.00</b> | 0.75 | 0.93        | 0.91        | 0.94        |
|                    |          | Precision | 0.70        | 0.89        | <b>1.00</b> | 0.79 | 0.94        | 0.92        | 0.95        |
|                    |          | Recall    | 0.60        | 0.87        | <b>1.00</b> | 0.75 | 0.93        | 0.91        | 0.94        |
| mockrobiota        | V1-V3    | F1-score  | 0.79        | 0.86        | 0.90        | 0.85 | 0.83        | 0.80        | 0.92        |
|                    |          | Precision | 0.81        | 0.90        | 0.93        | 0.89 | 0.86        | 0.83        | 0.96        |
|                    |          | Recall    | 0.80        | 0.85        | 0.90        | 0.84 | 0.83        | 0.79        | 0.92        |
|                    | V3-V4    | F1-score  | 0.86        | 0.98        | 0.99        | 0.98 | 0.99        | 0.80        | 0.99        |
|                    |          | Precision | 0.85        | 0.98        | 0.99        | 0.98 | 0.99        | 0.80        | 0.99        |
|                    |          | Recall    | 0.89        | 0.98        | 0.99        | 0.98 | 0.99        | 0.80        | 0.99        |
|                    | V3-V5    | F1-score  | 0.71        | 0.83        | 0.87        | 0.83 | 0.89        | 0.83        | 0.86        |
|                    |          | Precision | 0.72        | 0.85        | 0.88        | 0.85 | 0.90        | 0.85        | 0.92        |
|                    |          | Recall    | 0.75        | 0.85        | 0.88        | 0.84 | 0.90        | 0.82        | 0.87        |
|                    | V4       | F1-score  | 0.82        | 0.95        | 0.96        | 0.88 | 0.99        | 0.79        | 0.98        |
|                    |          | Precision | 0.81        | 0.95        | 0.96        | 0.89 | 0.99        | 0.79        | 0.98        |
|                    |          | Recall    | 0.85        | 0.95        | 0.96        | 0.88 | 0.99        | 0.79        | 0.98        |
|                    | full-16S | F1-score  | 0.75        | 0.83        | 0.86        | 0.79 | 0.89        | 0.83        | 0.87        |
|                    |          | Precision | 0.75        | 0.84        | 0.87        | 0.82 | 0.90        | 0.85        | 0.92        |
|                    |          | Recall    | 0.78        | 0.84        | 0.87        | 0.80 | 0.90        | 0.83        | 0.88        |
| vagimock           | V1-V3    | F1-score  | <b>1.00</b> | 0.91        | <b>1.00</b> | 0.89 | 0.95        | 0.94        | 0.95        |
|                    |          | Precision | <b>1.00</b> | 0.99        | <b>1.00</b> | 0.93 | <b>1.00</b> | 0.99        | <b>1.00</b> |
|                    |          | Recall    | <b>1.00</b> | 0.86        | <b>1.00</b> | 0.85 | 0.91        | 0.90        | 0.90        |
|                    | V3-V4    | F1-score  | <b>1.00</b> | 0.92        | <b>1.00</b> | 0.92 | 0.97        | 0.97        | 0.97        |
|                    |          | Precision | 0.99        | 0.95        | <b>1.00</b> | 0.95 | <b>1.00</b> | <b>1.00</b> | <b>1.00</b> |
|                    |          | Recall    | <b>1.00</b> | 0.90        | <b>1.00</b> | 0.90 | 0.94        | 0.94        | 0.94        |
|                    | V3-V5    | F1-score  | <b>1.00</b> | 0.91        | <b>1.00</b> | 0.91 | 0.98        | 0.97        | 0.98        |
|                    |          | Precision | <b>1.00</b> | 0.94        | <b>1.00</b> | 0.93 | <b>1.00</b> | <b>1.00</b> | <b>1.00</b> |
|                    |          | Recall    | <b>1.00</b> | 0.89        | <b>1.00</b> | 0.88 | 0.96        | 0.94        | 0.95        |
|                    | V4       | F1-score  | <b>1.00</b> | 0.90        | 0.99        | 0.90 | 0.96        | 0.96        | 0.96        |
|                    |          | Precision | <b>1.00</b> | 0.94        | <b>1.00</b> | 0.93 | <b>1.00</b> | <b>1.00</b> | <b>1.00</b> |
|                    |          | Recall    | <b>1.00</b> | 0.87        | 0.98        | 0.86 | 0.93        | 0.93        | 0.92        |
|                    | full-16S | F1-score  | <b>1.00</b> | 0.93        | 0.98        | 0.91 | 0.98        | 0.98        | 0.98        |
|                    |          | Precision | <b>1.00</b> | 0.99        | <b>1.00</b> | 0.92 | <b>1.00</b> | <b>1.00</b> | <b>1.00</b> |
|                    |          | Recall    | <b>1.00</b> | 0.91        | 0.96        | 0.89 | 0.96        | 0.96        | 0.96        |

Supplementary Table 8: Database benchmarking using Bray-Curtis distances between the expected and observed composition at family, genus and species level. Values are the average of the five metagenomic samples. Bold values are the highest

| Validation Dataset | Region   | Level   | Greengenes  | Greengenes2 | GSR         | GTDB        | ITGDB       | RDP         | SILVA       |
|--------------------|----------|---------|-------------|-------------|-------------|-------------|-------------|-------------|-------------|
| gutmock            | V1-V3    | Family  | 0.03        | 0.04        | <b>0.00</b> | 0.02        | 0.01        | 0.03        | 0.01        |
|                    |          | Genus   | 0.43        | 0.14        | 0.02        | 0.15        | 0.09        | 0.27        | 0.08        |
|                    |          | Species | 0.65        | 0.23        | 0.02        | 0.22        | 0.11        | 0.39        | 0.29        |
|                    | V3-V4    | Family  | 0.06        | 0.02        | 0.01        | 0.04        | 0.01        | 0.02        | 0.02        |
|                    |          | Genus   | 0.44        | 0.11        | 0.01        | 0.14        | 0.08        | 0.10        | 0.12        |
|                    |          | Species | 0.72        | 0.19        | 0.02        | 0.26        | 0.09        | 0.19        | 0.53        |
|                    | V3-V5    | Family  | 0.06        | 0.02        | <b>0.00</b> | 0.03        | 0.01        | 0.01        | 0.02        |
|                    |          | Genus   | 0.41        | 0.11        | 0.02        | 0.12        | 0.08        | 0.10        | 0.09        |
|                    |          | Species | 0.70        | 0.20        | 0.05        | 0.32        | 0.13        | 0.24        | 0.41        |
|                    | V4       | Family  | 0.07        | 0.03        | <b>0.00</b> | 0.06        | 0.01        | 0.02        | 0.02        |
|                    |          | Genus   | 0.41        | 0.11        | 0.03        | 0.18        | 0.10        | 0.10        | 0.13        |
|                    |          | Species | 0.70        | 0.24        | 0.08        | 0.32        | 0.16        | 0.13        | 0.54        |
|                    | full-16S | Family  | 0.06        | 0.03        | <b>0.00</b> | 0.06        | 0.01        | 0.01        | 0.02        |
|                    |          | Genus   | 0.38        | 0.12        | <b>0.00</b> | 0.22        | 0.06        | 0.09        | 0.06        |
|                    |          | Species | 0.70        | 0.20        | 0.01        | 0.54        | 0.09        | 0.12        | 0.26        |
| mockrobiota        | V1-V3    | Family  | 0.08        | 0.07        | 0.05        | 0.04        | 0.05        | 0.14        | 0.06        |
|                    |          | Genus   | 0.20        | 0.15        | 0.10        | 0.16        | 0.16        | 0.21        | 0.08        |
|                    |          | Species | 0.74        | 0.25        | 0.13        | 0.21        | 0.22        | 0.36        | 0.16        |
|                    | V3-V4    | Family  | 0.02        | 0.01        | 0.01        | 0.01        | 0.01        | 0.20        | 0.01        |
|                    |          | Genus   | 0.11        | 0.02        | 0.01        | 0.02        | 0.01        | 0.20        | 0.01        |
|                    |          | Species | 0.67        | 0.14        | 0.10        | 0.25        | 0.14        | 0.49        | 0.25        |
|                    | V3-V5    | Family  | 0.06        | 0.04        | 0.02        | 0.05        | 0.01        | 0.13        | 0.03        |
|                    |          | Genus   | 0.25        | 0.15        | 0.12        | 0.16        | 0.08        | 0.18        | 0.13        |
|                    |          | Species | 0.73        | 0.33        | 0.15        | 0.34        | 0.20        | 0.41        | 0.30        |
|                    | V4       | Family  | 0.02        | 0.01        | 0.01        | 0.09        | 0.01        | 0.16        | 0.01        |
|                    |          | Genus   | 0.15        | 0.05        | 0.04        | 0.12        | 0.01        | 0.21        | 0.02        |
|                    |          | Species | 0.79        | 0.24        | 0.13        | 0.46        | 0.09        | 0.44        | 0.21        |
|                    | full-16S | Family  | 0.06        | 0.05        | 0.02        | 0.03        | 0.01        | 0.14        | 0.04        |
|                    |          | Genus   | 0.22        | 0.16        | 0.13        | 0.20        | 0.09        | 0.17        | 0.12        |
|                    |          | Species | 0.68        | 0.28        | 0.23        | 0.66        | 0.15        | 0.25        | 0.18        |
| vagimock           | V1-V3    | Family  | <b>0.00</b> | <b>0.00</b> | <b>0.00</b> | <b>0.00</b> | <b>0.00</b> | 0.01        | <b>0.00</b> |
|                    |          | Genus   | <b>0.00</b> | 0.14        | <b>0.00</b> | 0.15        | 0.09        | 0.10        | 0.10        |
|                    |          | Species | 0.41        | 0.50        | 0.17        | 0.53        | 0.28        | 0.65        | 0.63        |
|                    | V3-V4    | Family  | <b>0.00</b> | <b>0.00</b> | <b>0.00</b> | <b>0.00</b> | <b>0.00</b> | <b>0.00</b> | <b>0.00</b> |
|                    |          | Genus   | <b>0.00</b> | 0.10        | <b>0.00</b> | 0.10        | 0.06        | 0.06        | 0.06        |
|                    |          | Species | 0.43        | 0.38        | 0.05        | 0.52        | 0.10        | 0.41        | 0.17        |
|                    | V3-V5    | Family  | <b>0.00</b> | <b>0.00</b> | <b>0.00</b> | <b>0.00</b> | <b>0.00</b> | <b>0.00</b> | <b>0.00</b> |
|                    |          | Genus   | <b>0.00</b> | 0.11        | <b>0.00</b> | 0.12        | 0.04        | 0.06        | 0.05        |
|                    |          | Species | 0.41        | 0.30        | 0.01        | 0.52        | 0.06        | 0.33        | 0.25        |
|                    | V4       | Family  | <b>0.00</b> | <b>0.00</b> | <b>0.00</b> | <b>0.00</b> | <b>0.00</b> | <b>0.00</b> | <b>0.00</b> |
|                    |          | Genus   | <b>0.00</b> | 0.13        | 0.02        | 0.14        | 0.07        | 0.07        | 0.08        |
|                    |          | Species | 0.43        | 0.32        | 0.05        | 0.51        | 0.08        | 0.35        | 0.23        |
|                    | full-16S | Family  | <b>0.00</b> | <b>0.00</b> | <b>0.00</b> | 0.01        | <b>0.00</b> | <b>0.00</b> | <b>0.00</b> |
|                    |          | Genus   | <b>0.00</b> | 0.09        | 0.04        | 0.11        | 0.04        | 0.04        | 0.04        |
|                    |          | Species | 0.41        | 0.25        | 0.04        | 0.46        | 0.04        | 0.08        | 0.07        |
